# Supplementary material
Source: PubMed Central journal article supplement (PMC7081149)
Supplement: jamapsychiatry-77-694-s001.pdf [file jamapsychiatry-77-694-s001.pdf]

## Supplementary Online Content

Cuijpers P, Karyotaki E, Eckshtain D, et al. Psychotherapy for depression across different age groups: a systematic review and meta-analysis. *JAMA Psychiatry*. Published online March 18, 2020. doi:10.1001/jamapsychiatry.2020.0164

- eAppendix 1.** Search string for PubMed
- eAppendix 2.** Algorithm for selecting one depression measure for each study
- eAppendix 3.** Flowchart on the selection of studies
- eAppendix 4.** Key characteristics of the included studies
- eAppendix 5.** References of the included studies
- eAppendix 6.** Description of sample of included studies
- eAppendix 7.** Sensitivity analyses: only low risk of bias
- eAppendix 8.** Sensitivity analyses: only CBT
- eAppendix 9.** Sensitivity analyses: specific target populations excluded
- eAppendix 10.** Sensitivity analyses: only diagnosed mood disorders
- eAppendix 11.** Sensitivity analyses using the multilevel meta-analysis model
- eAppendix 12.** Long-term effects across different age groups
- eAppendix 13.** Long-term effects of psychotherapies

This supplementary material has been provided by the authors to give readers additional information about their work.

## Appendix A. Search string for PubMed

(Psychotherapy [MH] OR psychotherap\*[All Fields] OR cbt[All Fields] OR "behavior therapies"[All Fields] OR "behavior therapy"[All Fields] OR "behavior therapeutic"[All Fields] OR "behavior therapeutical"[All Fields] OR "behavior therapeutics"[All Fields] OR "behavior therapist"[All Fields] OR "behavior therapists"[All Fields] OR "behavior treatment"[All Fields] OR "behavior treatments"[All Fields] OR "behaviors therapies"[All Fields] OR "behaviors therapy"[All Fields] OR "behaviors therapeutics"[All Fields] OR "behaviors therapeutic"[All Fields] OR "behaviors therapeutical"[All Fields] OR "behaviors therapist"[All Fields] OR "behaviors therapists"[All Fields] OR "behaviors treatment"[All Fields] OR "behaviors treatments"[All Fields] OR "behavioral therapies"[All Fields] OR "behavioral therapy"[All Fields] OR "behavioral therapeutics"[All Fields] OR "behavioral therapeutic"[All Fields] OR "behavioral therapeutical"[All Fields] OR "behavioral therapist"[All Fields] OR "behavioral therapists"[All Fields] OR "behavioral treatment"[All Fields] OR "behavioral treatments"[All Fields] OR "behaviour therapies"[All Fields] OR "behaviour therapy"[All Fields] OR "behaviour therapeutic"[All Fields] OR "behaviour therapeutical"[All Fields] OR "behaviour therapeutics"[All Fields] OR "behaviour therapist"[All Fields] OR "behaviour therapists"[All Fields] OR "behaviour treatment"[All Fields] OR "behaviour treatments"[All Fields] OR "behaviours therapies"[All Fields] OR "behaviours therapy"[All Fields] OR "behaviours therapeutics"[All Fields] OR "behaviours therapeutic"[All Fields] OR "behaviours therapeutical"[All Fields] OR "behaviours therapist"[All Fields] OR "behaviours therapists"[All Fields] OR "behaviours treatment"[All Fields] OR "behaviours treatments"[All Fields] OR "behavioural therapies"[All Fields] OR "behavioural therapy"[All Fields] OR "behavioural therapeutics"[All Fields] OR "behavioural therapeutic"[All Fields] OR "behavioural therapeutical"[All Fields] OR "behavioural therapist"[All Fields] OR "behavioural therapists"[All Fields] OR "behavioural treatment"[All Fields] OR "behavioural treatments"[All Fields] OR "cognition therapies"[All Fields] OR "cognition therapie"[All Fields] OR "cognition therapy"[All Fields] OR "cognition therapeutical"[All Fields] OR "cognition therapeutic"[All Fields] OR "cognition therapeutics"[All Fields] OR "cognition therapist"[All Fields] OR "cognition therapists"[All Fields] OR "cognition treatment"[All Fields] OR "cognition treatments"[All Fields] OR psychodynamic[All Fields] OR Psychoanalysis[MH] OR psychoanalysis[All Fields] OR psychoanalytic\*[All Fields] OR counselling[All Fields] OR counseling[All Fields] OR Counseling[MH] OR "problem-solving"[All Fields] OR mindfulness[All Fields] OR (acceptance[All Fields] AND commitment[All Fields] ) OR "assertiveness training"[All Fields] OR "behavior activation"[All Fields] OR "behaviors activation"[All Fields] OR "behavioral activation"[All Fields] OR "cognitive therapies"[All Fields] OR "cognitive therapy"[All Fields] OR "cognitive therapeutic"[All Fields] OR "cognitive therapeutics"[All Fields] OR "cognitive therapeutical"[All Fields] OR "cognitive therapist"[All Fields] OR "cognitive therapists"[All Fields] OR "cognitive treatment"[All Fields] OR "cognitive treatments"[All Fields] OR "cognitive restructuring"[All Fields] OR (("compassion-focused"[All Fields] OR "compassion-focussed"[All Fields]) AND (therapy[SH] OR therapies[All Fields] OR therapy[All Fields] OR therap\*[All Fields] OR therapis\*[All Fields] OR Therapeutics [OR treatment\*[All Fields]]) OR ((therapy[SH] OR therapies[All Fields] OR therapy [All Fields] OR therap\*[All Fields] OR therapis\*[All Fields] OR Therapeutics[MH] OR treatment\*[All Fields]) AND constructivist\*[All Fields])) OR "metacognitive therapies"[All Fields] OR "metacognitive therapy"[All Fields] OR "metacognitive therapeutic"[All Fields] OR "metacognitive therapeutics"[All Fields] OR "metacognitive therapeutical"[All Fields] OR "metacognitive therapist"[All Fields] OR

"metacognitive therapists"[All Fields] OR "metacognitive treatment"[All Fields] OR "metacognitive treatments"[All Fields] OR "meta-cognitive therapies"[All Fields] OR "metacognitive therapy"[All Fields] OR "meta-cognitive therapeutic"[All Fields] OR "metacognitive therapeutics"[All Fields] OR "meta-cognitive therapeutical"[All Fields] OR "metacognitive therapist"[All Fields] OR "meta-cognitive therapists"[All Fields] OR "metacognitive treatment"[All Fields] OR "meta-cognitive treatments"[All Fields] OR "solution-focused therapies"[All Fields] OR "solution-focused therapy"[All Fields] OR "solution-focused therapeutic"[All Fields] OR "solution-focused therapeutics"[All Fields] OR "solution-focused therapeutical"[All Fields] OR "solution focused therapies"[All Fields] OR "solution focused therapy"[All Fields] OR "solution focused therapeutic"[All Fields] OR "solution focused therapeutics"[All Fields] OR "solution focussed therapies"[All Fields] OR "solution-focussed therapy"[All Fields] OR "solution-focussed therapeutic"[All Fields] OR "solution-focussed therapeutics"[All Fields] OR "solution-focussed therapeutical"[All Fields] OR "solution focussed therapies"[All Fields] OR "solution focussed therapy"[All Fields] OR "solution focussed therapeutic"[All Fields] OR "solution focussed therapeutics"[All Fields] OR "solution focussed therapeutical"[All Fields] OR "self-control therapies"[All Fields] OR "self-control therapy"[All Fields] OR "self-control therapeutics"[All Fields] OR "self-control therapeutical"[All Fields] OR "self-control therapeutic"[All Fields] OR "self-control training"[All Fields] OR "self-control trainings"[All Fields] OR "self control therapies"[All Fields] OR "self control therapy"[All Fields] OR "self control therapeutics"[All Fields] OR "self control therapeutical"[All Fields] OR "self control therapeutic"[All Fields] OR "self control training"[All Fields] OR "self control trainings"[All Fields] AND (Depressive Disorder[MH] OR Depression[MH] OR dysthymi\*[All Fields] OR "affective disorder"[All Fields] OR "affective disorders"[All Fields] OR "mood disorder"[All Fields] OR "mood disorders"[All Fields] OR depression\*[All Fields] OR depressive\*[All Fields] OR "dysthymic disorder"[MeSH Terms]) AND ((randomized controlled trial [pt] OR controlled clinical trial [pt] OR randomized [tiab] OR randomly [tiab] NOT (animals[mh] NOT (animals[mh] AND humans [mh])))

## Appendix B. Algorithm for selecting one depression measure for each study

The algorithm used the following priorities:

1. HAMD;
2. BDI-I or II;
3. Another clinician-rated instrument;
4. Another self-report instrument, with priority for:
  - a. PHQ-9,
  - b. CES-D
  - c. HADS-D;
  - d. GDS;
  - e. EPDS;
  - f. MMPI-D;
  - g. CDI (in children/adolescents),
  - h. RADS-R;
5. When two or more dichotomous outcomes were given we preferred “response” as outcome,
6. When ratings from parents and children were given we preferred parent ratings.

## Appendix C. Flowchart on the selection of studies

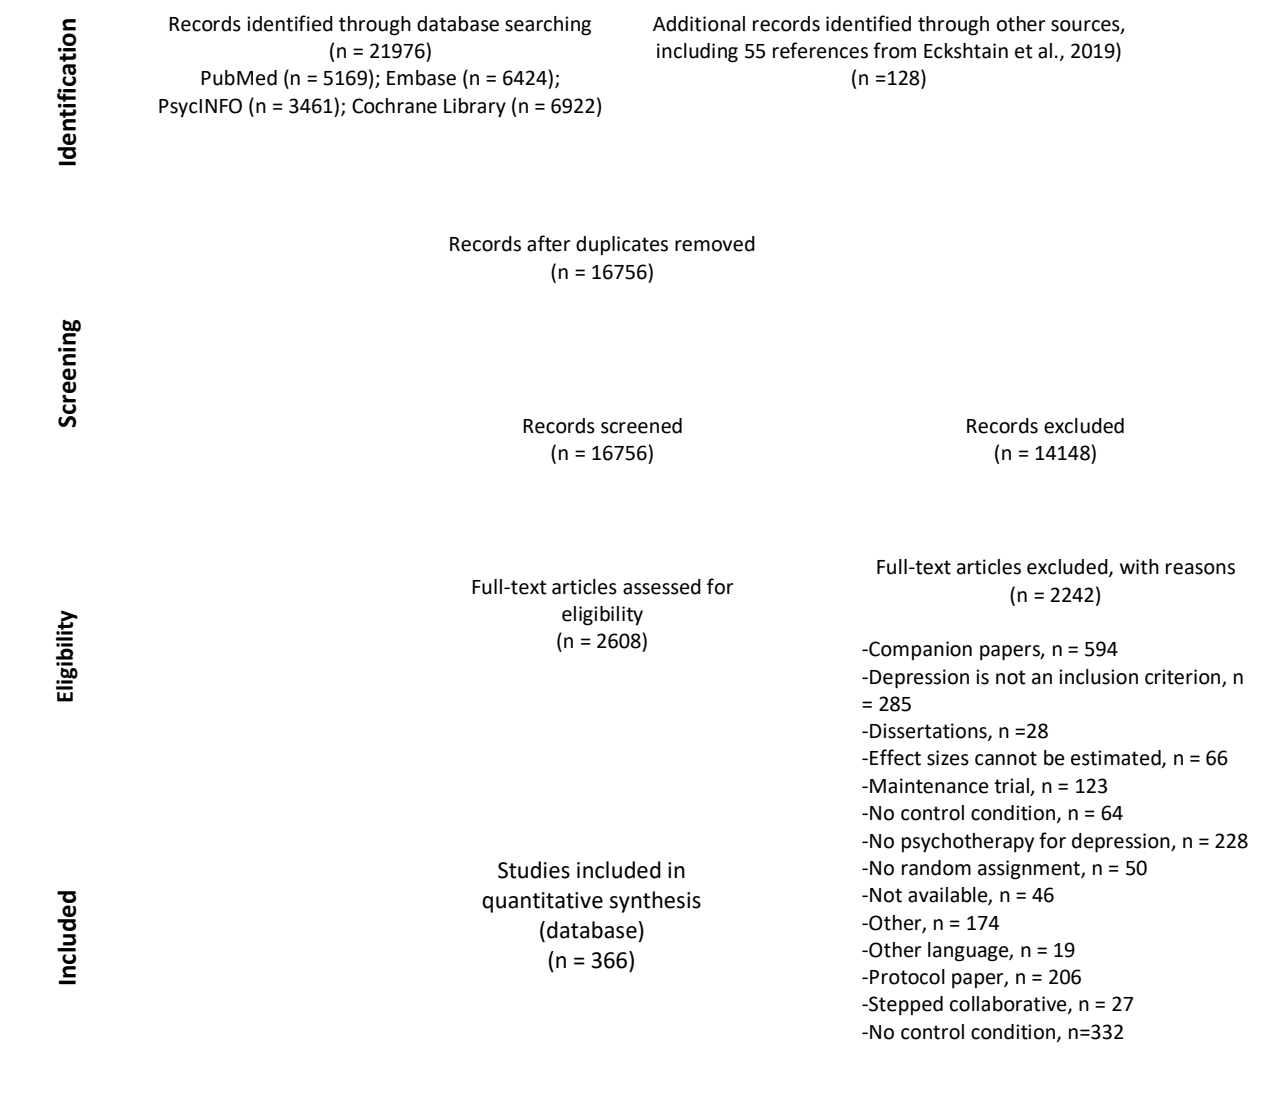

## Appendix D. Key characteristics of the included studies

| <i>Study</i>        | <i>g</i> | <i>se</i> | <i>Age group</i> | <i>Mean age</i> | <i>Recr</i> | <i>Dx</i> | <i>spec pop</i> | <i>Pr wom</i> | <i>Ther-apy</i> | <i>For- mat</i> | <i>N sess</i> | <i>Ctr</i> | <i>Country</i> | <i>SG</i> | <i>AC</i> | <i>BA</i> | <i>ITT</i> | <i>RoB</i> |
|---------------------|----------|-----------|------------------|-----------------|-------------|-----------|-----------------|---------------|-----------------|-----------------|---------------|------------|----------------|-----------|-----------|-----------|------------|------------|
| Aagaard, 2017       | 0,00     | 0,23      | adults           | 48.00           | Clin        | +         | No              | 0,71          | cbt             | Grp             | 8             | cau        | EU             | +         | +         | sr        | -          | 3          |
| Abas, 2018          | 0,71     | 0,38      | adults           | 37.80           | Other       | -         | Gen med         | 0,66          | pst             | Ind             | 5             | cau        | Other          | +         | +         | sr        | +          | 4          |
| Ackerson, 1998      | 1,31     | 0,47      | adol             | 16.00           | Comm        | -         | No              | 0,64          | cbt             | Gsh             | 4             | wl         | US             | -         | -         | -         | -          | 0          |
| Ahmadpanah, 2016    | 1,57     | 0,41      | adults           | 36.50           | Other       | -         | Gen med         | 1,00          | 3rd             | Ind             | 8             | cau        | Other          | +         | +         | sr        | -          | 3          |
| Alexopoulos, 2016   | -0,19    | 0,18      | elderly          | 74.90           | Other       | +         | Gen med         |               | pst             | Ind             | 11            | othctr     | US             | +         | -         | +         | +          | 3          |
| Allart,2003         | 0,57     | 0,20      | adults           | 45.50           | Comm        | -         | No              | 0,62          | cbt             | Grp             | 12            | cau        | EU             | -         | -         | sr        | -          | 1          |
| Ammerman, 2013a     | 0,87     | 0,22      | Young ad         | 21.90           | Other       | +         | PPD             | 1,00          | cbt             | Ind             | 11            | cau        | US             | -         | +         | +         | +          | 3          |
| Andersson,2005      | 0,87     | 0,23      | adults           | 36.30           | Comm        | -         | No              | 0,74          | cbt             | Gsh             | 5             | othctr     | EU             | +         | +         | sr        | +          | 4          |
| Arean,1993 - pst    | 1,27     | 0,42      | elderly          | 66.50           | Comm        | +         | No              | 0,75          | pst             | Grp             | 12            | wl         | US             | -         | -         | +         | -          | 1          |
| Arean,1993 - rem    | 0,42     | 0,36      | elderly          | 66.50           | Comm        | +         | No              | 0,75          | lrt             | Grp             | 12            | wl         | US             | -         | -         | +         | -          | 1          |
| Arjadi, 2018        | 0,39     | 0,11      | adults           | 24.50           | Comm        | +         | No              | 0,81          | bat             | Gsh             | 5             | othctr     | Other          | +         | +         | sr        | +          | 4          |
| Asarnow, 2002       | 0,30     | 0,40      | children         |                 | Other       | -         | No              | 0,65          | cbt             | Ind             | 10            | wl         | US             | -         | -         | sr        | -          | 1          |
| Ayen, 2004 - cbt    | 3,68     | 0,71      | adults           | 51.30           | Comm        | +         | Other           | 1,00          | cbt             | Grp             | 12            | wl         | EU             | -         | -         | sr        | -          | 1          |
| Ayen, 2004 - sup    | 2,00     | 0,46      | adults           | 51.30           | Comm        | +         | Other           | 1,00          | sup             | Grp             | 12            | wl         | EU             | -         | -         | sr        | -          | 1          |
| Barber, 2012        | 0,08     | 0,26      | adults           | 37.50           | Comm        | +         | No              | 0,59          | dyn             | Ind             | 20            | othctr     | US             | +         | -         | +         | +          | 3          |
| Barnhofer, 2009     | 0,92     | 0,37      | adults           | 41.90           | Comm        | +         | No              | 0,68          | 3rd             | Grp             | 6             | cau        | UK             | +         | +         | sr        | +          | 4          |
| Barrera, 1979       | 0,96     | 0,45      | adults           | 35.80           | Comm        | -         | No              | 0,50          | bat             | Grp             | 8             | wl         | US             | -         | -         | sr        | -          | 1          |
| Barret, 2001        | -0,07    | 0,16      | adults           | 44.10           | Clin        | +         | No              | 0,64          | pst             | Ind             | 6             | othctr     | US             | +         | +         | sr        | +          | 4          |
| Beach, 1992 - ind   | 1,05     | 0,45      | adults           | 39.10           | Comm        | +         | Other           | 1,00          | cbt             | Ind             | 18            | wl         | US             | -         | -         | sr        | -          | 1          |
| Beach, 1992 - mar   | 1,46     | 0,47      | adults           | 39.10           | Comm        | +         | Other           | 1,00          | cbt             | Other           | 18            | wl         | US             | -         | -         | sr        | -          | 1          |
| Bedard, 2014        | 0,35     | 0,23      | adults           | 46.50           | Comm        | -         | Gen med         | 0,45          | 3rd             | Grp             | 10            | wl         | Can            | +         | +         | sr        | -          | 3          |
| Beeber, 2010        | 0,77     | 0,24      | adults           | 26.00           | Other       | -         | Other           | 1,00          | ipt             | Ind             | 16            | cau        | US             | -         | -         | sr        | -          | 1          |
| Berger, 2011        | 1,13     | 0,30      | adults           | 38.80           | Comm        | +         | No              | 0,70          | cbt             | Gsh             | 10            | wl         | EU             | +         | +         | sr        | +          | 4          |
| Berger, 2017        | 0,43     | 0,20      | adults           | 43.10           | Clin        | +         | No              | 0,66          | cbt             | Gsh             | 9             | cau        | EU             | +         | +         | sr        | +          | 4          |
| Beutel, 2014        | 0,52     | 0,19      | adults           | 51.80           | Other       | +         | Gen med         | 1,00          | dyn             | Ind             | 18            | cau        | EU             | +         | +         | +         | +          | 4          |
| Boele, 2018         | 0,61     | 0,29      | adults           | 44.90           | Other       | -         | Gen med         | 0,55          | pst             | Gsh             | 5             | wl         | EU             | +         | +         | sr        | +          | 4          |
| Boeschoten, 2017    | 0,08     | 0,16      | adults           | 48.90           | Comm        | -         | Gen med         | 0,80          | pst             | Gsh             | 5             | wl         | EU             | +         | +         | sr        | +          | 4          |
| Bohlmeijer, 2011    | 0,60     | 0,21      | adults           | 49.00           | Comm        | -         | No              | 0,82          | 3rd             | Grp             | 7             | wl         | EU             | +         | +         | sr        | +          | 4          |
| Bolton, 2003        | 1,32     | 0,13      | adults           | 45.20           | Other       | +         | No              | 0,51          | ipt             | Grp             | 16            | cau        | Other          | +         | -         | sr        | +          | 3          |
| Bolton, 2007        | 0,57     | 0,14      | adol             | 15.00           | Other       | -         | Other           | 0,57          | ipt             | Grp             | 16            | othctr     | Other          | +         | -         | +         | +          | 3          |
| Bowman, 1995 - cogn | 0,96     | 0,54      | adults           | 36.20           | Comm        | -         | No              | 0,63          | cbt             | Gsh             | 4             | wl         | US             | -         | -         | -         | -          | 0          |
| Bowman, 1995 - se   | 1,44     | 0,58      | adults           | 36.20           | Comm        | -         | No              | 0,63          | pst             | Gsh             | 4             | wl         | US             | -         | -         | -         | -          | 0          |
| Brown, 1984 - grp   | 0,43     | 0,60      | adults           | 36.50           | Comm        | +         | No              | 0,70          | cbt             | Grp             | 12            | wl         | US             | -         | -         | sr        | -          | 1          |
| Brown, 1984 - gsh   | 0,44     | 0,61      | adults           | 36.50           | Comm        | +         | No              | 0,70          | cbt             | Ind             | 12            | wl         | US             | -         | -         | sr        | -          | 1          |
| Brown, 1984 - ind   | 0,34     | 0,61      | adults           | 36.50           | Comm        | +         | No              | 0,70          | cbt             | Gsh             | 12            | wl         | US             | -         | -         | sr        | -          | 1          |
| Buhrman, 2015       | 0,30     | 0,28      | adults           | 50.70           | Comm        | -         | Gen med         | 0,85          | cbt             | Gsh             | 6             | wl         | EU             | +         | +         | sr        | +          | 4          |
| Buntrock, 2015      | 0,66     | 0,10      | adults           | 45.00           | Comm        | -         | No              | 0,74          | other           | Gsh             | 5             | cau        | EU             | +         | +         | sr        | +          | 4          |
| Burns, 2007         | 0,40     | 0,22      | older old        | 81.10           | Other       | -         | Gen med         | 0,77          | other           | Ind             | 6             | cau        | UK             | +         | +         | sr        | +          | 4          |
| Burns, 2013         | 0,93     | 0,38      | adults           | 29.20           | Other       | -         | PPD             | 1,00          | cbt             | Ind             | 12            | cau        | UK             | +         | +         | sr        | +          | 4          |

|                      |       |      |           |       |       |   |         |      |       |       |    |        |        |   |   |    |   |   |
|----------------------|-------|------|-----------|-------|-------|---|---------|------|-------|-------|----|--------|--------|---|---|----|---|---|
| Carlbring, 2013a     | 0,74  | 0,23 | adults    | 44.40 | Comm  | + | No      | 0,83 | 3rd   | Gsh   | 5  | wl     | EU     | + | + | sr | + | 4 |
| Carr, 2016           | 0,34  | 0,22 | adults    | 41.00 | Clin  | + | No      | 0,66 | cbt   | Grp   | 20 | cau    | EU     | - | - | +  | + | 2 |
| Carta, 2012          | 0,25  | 0,25 | adults    | 42.50 | Clin  | + | No      | 0,66 | cbt   | Ind   | 12 | cau    | EU     | - | - | sr | - | 1 |
| Casanas, 2012        | 0,29  | 0,13 | adults    | 53.40 | Clin  | + | No      | 0,89 | cbt   | Grp   | 9  | cau    | EU     | + | + | sr | + | 4 |
| Castonguay, 2004     | 1,75  | 0,50 | adults    | 38.80 | Comm  | + | No      | 0,75 | cbt   | Ind   | 16 | wl     | US     | - | - | +  | - | 1 |
| Chan, 2012 - cbt     | 1,94  | 0,53 | adults    | 46.40 | Clin  | + | No      | 0,82 | other | Grp   | 10 | wl     | East A | - | + | +  | - | 2 |
| Chan, 2012 - mbt     | 1,15  | 0,45 | adults    | 46.40 | Clin  | + | No      | 0,82 | cbt   | Grp   | 10 | wl     | East A | - | + | +  | - | 2 |
| Chan, 2013           | 1,43  | 0,43 | elderly   | 46.20 | Other | - | No      | 0,81 | lrt   | Ind   | 5  | cau    | East A | + | - | sr | + | 3 |
| Charkandeh, 2016     | 2,01  | 0,22 | adol      | 15.30 | Clin  | + | No      | 0,54 | cbt   | Ind   | 24 | wl     | Other  | + | - | sr | - | 2 |
| Chen, 2000           | 0,60  | 0,29 | adults    | 29.10 | Other | - | PPD     | 1,00 | sup   | Grp   | 4  | cau    | East A | - | - | sr | - | 1 |
| Chesney, 2003        | 0,16  | 0,22 | adults    | 39.00 | Comm  | - | Gen med | 0,00 | other | Grp   | 10 | wl     | US     | - | - | sr | - | 1 |
| Chiang, 2015         | 4,21  | 0,46 | adults    | 46.10 | Clin  | + | No      | 0,63 | cbt   | Grp   | 12 | cau    | East A | + | + | +  | - | 3 |
| Cho, 2008            | 1,04  | 0,44 | adults    | 29.60 | Other | + | PPD     | 1,00 | cbt   | Ind   | 9  | cau    | East A | - | - | sr | - | 1 |
| Choi, 2012           | 0,55  | 0,25 | adults    | 39.00 | Comm  | + | Other   | 0,80 | cbt   | Gsh   | 6  | wl     | Aus    | + | + | sr | - | 3 |
| Choi, 2013 - ind     | 0,30  | 0,37 | elderly   | 65.20 | Other | - | No      | 0,78 | pst   | Ind   | 6  | othctr | US     | - | - | -  | + | 1 |
| Choi, 2013 - tel     | 0,50  | 0,37 | elderly   | 65.20 | Other | - | No      | 0,78 | pst   | Other | 6  | othctr | US     | - | - | -  | + | 1 |
| Chowdhary, 2016      | 0,45  | 0,27 | adults    | 40.60 | Other | - | No      | 0,69 | bat   | Ind   | 7  | cau    | Other  | + | - | sr | + | 3 |
| Choy, 2016           | 0,99  | 0,23 | older old | 78.70 | Other | - | No      | 0,65 | lrt   | Grp   | 7  | wl     | East A | - | - | sr | - | 1 |
| Clark, 2003 ipt      | 0,46  | 0,47 | adults    | 31.40 | Comm  | + | PPD     | 1,00 | ipt   | Grp   | 12 | wl     | US     | - | - | sr | - | 1 |
| Clark, 2003 m-itg    | 0,60  | 0,51 | adults    | 31.40 | Comm  | + | PPD     | 1,00 | other | Grp   | 12 | wl     | US     | - | - | sr | - | 1 |
| Clark, 2008          | 1,09  | 0,39 | adults    | 30.90 | Comm  | + | PPD     | 1,00 | other | Grp   | 12 | wl     | US     | - | - | sr | - | 1 |
| Clarke, 1995         | 0,31  | 0,18 | adol      | 15.30 | Other | - | No      | 0,61 | cbt   | Grp   | 15 | cau    | US     | - | - | -  | - | 0 |
| Clarke, 1999 - cwd   | 0,22  | 0,31 | adol      | 16.20 | Comm  | + | No      | 0,71 | cbt   | Grp   | 16 | wl     | US     | - | - | +  | - | 1 |
| Clarke, 1999 - cwd+p | -0,01 | 0,32 | adol      | 16.20 | Comm  | + | No      | 0,71 | cbt   | Grp   | 16 | wl     | US     | - | - | +  | - | 1 |
| Clarke, 2001         | 0,15  | 0,21 | adol      | 14.60 | Other | - | Other   | 0,64 | cbt   | Grp   | 15 | cau    | US     | + | + | +  | - | 3 |
| Clarke, 2002         | 0,04  | 0,21 | adol      | 15.30 | Other | + | Other   | 0,69 | cbt   | Grp   | 16 | cau    | US     | - | - | +  | + | 2 |
| Cohen, 2010          | 0,54  | 0,36 | adults    | 43.20 | Comm  | + | Other   | 1,00 | other | Other | 5  | wl     | US     | - | - | +  | - | 1 |
| Cooper, 2003 - cbt   | 0,43  | 0,29 | adults    | 27.70 | Other | + | PPD     | 1,00 | cbt   | Ind   | 10 | cau    | UK     | + | + | sr | - | 3 |
| Cooper, 2003 - dyn   | 0,54  | 0,29 | adults    | 27.70 | Other | + | PPD     | 1,00 | dyn   | Ind   | 10 | cau    | UK     | + | + | sr | - | 3 |
| Cooper, 2003 - sup   | 0,25  | 0,28 | adults    | 27.70 | Other | + | PPD     | 1,00 | sup   | Ind   | 10 | cau    | UK     | + | + | sr | - | 3 |
| Cramer, 2011         | 0,25  | 0,27 | adults    | 42.50 | Comm  | - | Other   | 1,00 | cbt   | Grp   | 12 | cau    | UK     | + | - | sr | + | 3 |
| De Cuyper, 2004      | 0,27  | 0,43 | children  | 10.00 | Other | - | No      | 0,75 | cbt   | Grp   | 16 | wl     | EU     | - | - | sr | - | 1 |
| De Jong, 2018        | 0,06  | 0,33 | adults    | 50.70 | Comm  | + | Gen med | 0,75 | 3rd   | Grp   | 7  | wl     | US     | - | - | -  | + | 1 |
| Dekker, 2012         | 0,42  | 0,31 | elderly   | 66.00 | Other | - | Gen med | 0,74 | cbt   | Ind   | 1  | cau    | US     | + | + | sr | + | 4 |
| DeRubeis, 2005       | 0,45  | 0,22 | adults    | 40.00 | Comm  | + | No      | 0,59 | cbt   | Ind   | 14 | othctr | US     | - | - | +  | + | 2 |
| Desautels, 2017      | 1,07  | 0,38 | elderly   | 57.10 | Other | - | Gen med | 1,00 | cbt   | Ind   | 8  | wl     | Can    | + | + | +  | + | 4 |
| Diamond, 2002        | 0,72  | 0,36 | adol      | 14.90 | Other | + | No      | 0,78 | other | Ind   | 8  | wl     | US     | - | - | sr | - | 1 |
| Dimidjian, 2006 - ba | 0,85  | 0,34 | adults    | 39.90 | Comm  | + | No      | 0,66 | bat   | Ind   | 24 | othctr | US     | + | - | +  | + | 3 |
| Dimidjian, 2006 - ct | 0,66  | 0,24 | adults    | 39.90 | Comm  | + | No      | 0,66 | cbt   | Ind   | 24 | othctr | US     | + | - | +  | + | 3 |
| Dimidjian, 2017      | 0,33  | 0,17 | adults    | 28.80 | Other | - | PPD     | 1,00 | bat   | Other | 10 | cau    | US     | + | + | sr | + | 4 |
| Dindo, 2012          | 1,15  | 0,34 | adults    | 32.80 | Other | + | Gen med | 0,93 | other | Grp   | 1  | wl     | US     | - | - | -  | + | 1 |
| Dobkin, 2011         | 1,14  | 0,24 | elderly   | 64.60 | Comm  | + | Gen med | 0,40 | cbt   | Ind   | 10 | cau    | US     | + | - | +  | + | 3 |
| Doering, 2013        | 1,04  | 0,28 | elderly   | 63.60 | Other | + | Gen med | 0,31 | cbt   | Ind   | 8  | cau    | US     | + | - | +  | + | 3 |
| Dowrick, 2000 - cwd  | 0,25  | 0,16 | adults    | 44.90 | Other | + | No      | 0,65 | pst   | Ind   | 6  | cau    | EU     | + | + | sr | + | 4 |

|                         |       |      |           |       |       |   |         |      |       |       |    |        |        |   |   |    |   |   |
|-------------------------|-------|------|-----------|-------|-------|---|---------|------|-------|-------|----|--------|--------|---|---|----|---|---|
| Dowrick, 2000 - pst     | 0,07  | 0,16 | adults    | 44.90 | Other | + | No      | 0,65 | cbt   | Grp   | 8  | cau    | EU     | + | + | sr | + | 4 |
| Duarte, 2009            | 0,81  | 0,22 | adults    | 53.20 | Other | + | Gen med | 0,59 | cbt   | Grp   | 12 | cau    | Other  | - | + | +  | - | 2 |
| Dwight-Johnson, 2011    | 1,78  | 0,23 | adults    | 39.80 | Other | - | Other   | 0,78 | cbt   | Other | 5  | cau    | US     | + | - | sr | + | 3 |
| Ebert, 2014             | 0,69  | 0,17 | adults    | 47.10 | Comm  | - | Other   | 0,83 | pst   | Gsh   | 5  | wl     | EU     | + | + | sr | + | 4 |
| Ebert, 2017             | 0,53  | 0,14 | adults    | 44.20 | Comm  | - | No      | 0,80 | other | Gsh   | 5  | wl     | EU     | + | + | +  | + | 4 |
| Ekers, 2011             | 1,15  | 0,35 | adults    | 44.70 | Clin  | + | No      | 0,62 | bat   | Ind   | 12 | wl     | UK     | + | + | sr | + | 4 |
| Ekkers, 2011            | 1,09  | 0,22 | elderly   | 72.70 | Clin  | + | No      | 0,77 | cbt   | Grp   | 7  | cau    | EU     | - | + | sr | + | 3 |
| Elkin, 1990 - cbt       | 0,23  | 0,22 | adults    | 35.00 | Clin  | + | No      | 0,70 | cbt   | Ind   | 13 | othctr | US     | + | - | +  | - | 4 |
| Elkin, 1990 - ipt       | 0,36  | 0,22 | adults    | 35.00 | Clin  | + | No      | 0,70 | ipt   | Ind   | 13 | othctr | US     | + | + | +  | + | 4 |
| Embling, 2002           | 2,47  | 0,43 | adults    |       | Clin  | + | No      |      | cbt   | Grp   | 12 | wl     | UK     | - | - | sr | + | 2 |
| Eseadi, 2018            | 9,56  | 1,28 | adults    | 35.30 | Other | - | Other   | 0,00 | cbt   | Ind   | 12 | cau    | Other  | - | - | sr | + | 2 |
| Euteneuer, 2017 - cbt-c | 0,76  | 0,31 | adults    | 37.30 | Comm  | + | No      | 0,49 | cbt   | Ind   | 16 | wl     | EU     | + | - | sr | + | 3 |
| Euteneuer, 2017 - cbt-e | 0,68  | 0,31 | adults    | 37.30 | Comm  | + | No      | 0,49 | cbt   | Ind   | 16 | wl     | EU     | + | - | sr | + | 3 |
| Evans, 1995 - cbt       | 0,57  | 0,35 | adults    | 53.90 | Other | - | Gen med | 0,35 | cbt   | Grp   | 8  | othctr | US     | - | - | sr | - | 1 |
| Evans, 1995 - sup       | 0,98  | 0,37 | adults    | 53.90 | Other | - | Gen med | 0,35 | sup   | Grp   | 8  | othctr | US     | - | - | sr | - | 1 |
| Fann, 2015 ind          | 0,11  | 0,31 | adults    | 45.80 | Comm  | + | Gen med | 0,37 | cbt   | Other | 10 | cau    | US     | + | - | +  | - | 2 |
| Fann, 2015 tel          | 0,14  | 0,27 | adults    | 45.80 | Comm  | + | Gen med | 0,37 | cbt   | Ind   | 9  | cau    | US     | + | - | +  | - | 2 |
| Faramarzi, 2008         | 1,72  | 0,30 | adults    | 28.40 | Other | - | Other   | 1,00 | cbt   | Grp   | 10 | cau    | Other  | - | - | sr | - | 1 |
| Fledderus, 2012 - act-e | 0,75  | 0,16 | adults    | 42.00 | Comm  | - | No      | 0,70 | 3rd   | Gsh   | 9  | wl     | EU     | + | - | sr | + | 3 |
| Fledderus, 2012 - act-m | 0,92  | 0,16 | adults    | 42.00 | Comm  | - | No      | 0,70 | 3rd   | Gsh   | 9  | wl     | EU     | + | - | sr | + | 3 |
| Floyd, 2004 - gsh       | 0,75  | 0,46 | elderly   | 68.00 | Comm  | + | No      | 0,76 | cbt   | Ind   | 16 | wl     | US     | - | - | -  | - | 0 |
| Floyd, 2004 - ind       | 1,73  | 0,58 | elderly   | 68.00 | Comm  | + | No      | 0,76 | cbt   | Gsh   | 4  | wl     | US     | - | - | -  | - | 0 |
| Folke, 2012             | 0,66  | 0,34 | adults    | 43.20 | Other | + | Other   | 0,88 | 3rd   | Other | 6  | cau    | EU     | - | - | sr | + | 2 |
| Fonagy, 2015            | 0,33  | 0,20 | adults    | 44.30 | Clin  | + | No      | 0,66 | dyn   | Ind   | 60 | cau    | UK     | + | + | +  | + | 4 |
| Forand, 2017            | 1,57  | 0,26 | adults    | 33.00 | Comm  | - | No      | 0,75 | cbt   | Gsh   | 6  | wl     | US     | + | - | -  | + | 2 |
| Forsell, 2017           | 0,87  | 0,33 | adults    | 31.00 | Comm  | + | PPD     | 1,00 | cbt   | Gsh   | 5  | cau    | EU     | + | + | sr | + | 4 |
| Freedland, 2009 - cbt   | 0,89  | 0,28 | elderly   | 60.70 | Other | + | Gen med | 0,50 | cbt   | Ind   | 11 | cau    | US     | + | + | +  | + | 4 |
| Freedland, 2009 - ssm   | 0,47  | 0,27 | elderly   | 60.70 | Other | + | Gen med | 0,50 | sup   | Ind   | 8  | cau    | US     | + | + | +  | + | 4 |
| Freedland, 2015         | 0,62  | 0,16 | elderly   | 55.80 | Other | + | Gen med | 0,46 | cbt   | Ind   | 11 | cau    | US     | - | + | +  | + | 3 |
| Fry, 1983 - str rem     | 3,01  | 0,33 | elderly   |       | Other | - | No      | 0,59 | lrt   | Ind   | 5  | othctr | US     | - | - | sr | - | 1 |
| Fry, 1983 - unstr rem   | 1,61  | 0,27 | elderly   |       | Other | - | No      | 0,59 | lrt   | Ind   | 5  | othctr | US     | - | - | sr | - | 1 |
| Furukawa, 2012          | 0,67  | 0,19 | adults    | 39.40 | Other | - | Other   | 0,22 | cbt   | Other | 7  | wl     | East A | + | + | sr | + | 4 |
| Garcia-Pena, 2015       | 0,60  | 0,26 | elderly   | 70.80 | Clin  | - | No      | 0,83 | cbt   | Grp   | 12 | cau    | Other  | + | - | sr | - | 2 |
| Gawrysiak, 2009         | 1,66  | 0,42 | Young ad  | 18.40 | Comm  | - | No      | 0,80 | bat   | Ind   | 1  | cau    | US     | - | - | sr | + | 2 |
| Gellis, 2008            | 1,94  | 0,31 | older old | 77.40 | Other | - | Gen med | 0,87 | pst   | Ind   | 6  | cau    | US     | + | - | +  | - | 2 |
| Gellis, 2010            | 0,83  | 0,34 | older old | 75.90 | Other | - | Gen med | 0,92 | pst   | Ind   | 6  | cau    | US     | - | + | +  | - | 2 |
| Geraedts, 2014          | 0,25  | 0,13 | adults    | 43.40 | Other | - | Other   | 0,62 | cbt   | Gsh   | 6  | cau    | EU     | + | + | sr | + | 4 |
| Gibbons, 2012           | -0,11 | 0,36 | adults    | 41.20 | Clin  | - | No      | 0,87 | dyn   | Ind   | 7  | cau    | US     | - | - | -  | - | 0 |
| Gillham, 2006           | -0,02 | 0,14 | children  | 11.50 | Comm  | - | No      | 0,53 | cbt   | Grp   | 12 | cau    | US     | + | - | sr | + | 2 |
| Gitlin, 2013            | 0,46  | 0,14 | elderly   | 69.60 | Comm  | - | No      | 0,78 | other | Ind   | 8  | wl     | US     | + | + | sr | + | 4 |
| Goodman, 2015           | 0,03  | 0,30 | adults    | 30.70 | Other | - | PPD     | 1,00 | other | Ind   | 8  | cau    | US     | - | + | sr | + | 3 |
| Greenberg, 2018         | 1,08  | 0,41 | adults    | 38.50 | Comm  | - | No      | 0,63 | 3rd   | Grp   | 7  | wl     | US     | - | - | +  | - | 1 |
| Grote, 2009             | 1,25  | 0,30 | adults    | 24.50 | Other | - | PPD     | 1,00 | ipt   | Ind   | 8  | cau    | US     | - | - | sr | - | 1 |
| Hagen, 2017             | 2,47  | 0,42 | adults    | 33.70 | Comm  | + | No      | 0,49 | 3rd   | Ind   | 10 | wl     | EU     | + | - | sr | + | 3 |



|                         |       |      |           |       |       |   |         |      |       |       |    |        |        |   |   |    |   |   |
|-------------------------|-------|------|-----------|-------|-------|---|---------|------|-------|-------|----|--------|--------|---|---|----|---|---|
| Hallford, 2016          | 1,25  | 0,42 | Young ad  | 20.80 | Clin  | - | Other   | 0,50 | lrt   | Ind   | 6  | cau    | Aus    | - | + | sr | + | 3 |
| Hallgren, 2015          | 0,32  | 0,09 | adults    | 43.00 | Clin  | - | No      | 0,73 | cbt   | Gsh   | 8  | cau    | EU     | + | + | +  | - | 3 |
| Hamamci, 2006 - ct\     | 1,42  | 0,55 | Young ad  | 19.50 | Comm  | - | No      | 0,48 | cbt   | Grp   | 11 | cau    | Other  | - | - | sr | - | 1 |
| Hamamci, 2006 - ct+dr   | 1,44  | 0,55 | Young ad  | 19.50 | Comm  | - | No      | 0,48 | cbt   | Grp   | 11 | cau    | Other  | - | - | sr | - | 1 |
| Hamdan-Mansour,2009     | 0,63  | 0,22 | Young ad  |       | Comm  | - | No      | 0,45 | cbt   | Grp   | 10 | cau    | Other  | - | + | sr | - | 2 |
| Haringsma, 2005         | 0,45  | 0,19 | elderly   | 64.20 | Comm  | - | No      | 0,69 | cbt   | Grp   | 9  | wl     | EU     | - | - | sr | + | 2 |
| Harley, 2008            | 0,84  | 0,46 | adults    | 41.80 | Clin  | + | No      | 0,75 | 3rd   | Grp   | 14 | wl     | US     | - | - | +  | - | 1 |
| Hassiotis, 2013         | 0,02  | 0,36 | adults    | 36.00 | Other | - | Other   | 0,63 | cbt   | Ind   | 12 | cau    | UK     | - | + | sr | + | 3 |
| Hautzinger, 2004        | 0,94  | 0,22 | elderly   | 68.50 | Clin  | + | No      | 0,79 | cbt   | Grp   | 12 | wl     | EU     | + | - | +  | + | 3 |
| Hayman, 1980            | 0,47  | 0,38 | Young ad  | 21.30 | Comm  | - | No      | 1,00 | other | Grp   | 8  | wl     | US     | + | - | sr | - | 2 |
| Heckman, 2011 - cop     | 0,36  | 0,18 | elderly   | 55.30 | Comm  | - | Gen med | 0,33 | other | Grp   | 7  | cau    | US     | + | - | sr | + | 3 |
| Heckman, 2011 - sup     | 0,23  | 0,18 | elderly   | 55.30 | Comm  | - | Gen med | 0,33 | other | Grp   | 7  | cau    | US     | + | - | sr | + | 3 |
| Heckman, 2017           | 3,20  | 0,26 | adults    | 51.90 | Comm  | + | Gen med | 0,37 | ipt   | Other | 8  | cau    | US     | + | - | sr | + | 3 |
| Hegerl, 2010            | 0,35  | 0,23 | adults    | 46.40 | Clin  | + | No      | 0,65 | cbt   | Grp   | 10 | othctr | EU     | + | + | +  | + | 4 |
| Hermanns, 2015          | 0,20  | 0,15 | adults    | 43.30 | Other | - | Gen med | 0,57 | cbt   | Grp   | 5  | cau    | EU     | - | + | sr | + | 3 |
| Herrmann-Lingen, 2016   | 0,00  | 0,08 | elderly   | 59.20 | Other | - | Gen med | 0,21 | dyn   | Other | 16 | cau    | EU     | + | - | sr | + | 3 |
| Holden, 1989            | 0,72  | 0,32 | adults    | 26.00 | Other | + | PPD     | 1,00 | sup   | Ind   | 8  | cau    | UK     | + | - | +  | - | 2 |
| Honey, 2002             | 0,36  | 0,30 | adults    | 27.90 | Other | - | PPD     | 1,00 | cbt   | Grp   | 8  | cau    | UK     | - | - | sr | + | 2 |
| Horrell, 2014           | 0,51  | 0,10 | adults    | 44.10 | Comm  | - | No      | 0,80 | cbt   | Grp   | 4  | wl     | UK     | + | + | sr | + | 4 |
| Hou, 2014               | 0,71  | 0,14 | adults    | 28.00 | Other | + | PPD     | 1,00 | cbt   | Other | 19 | cau    | East A | - | - | sr | - | 1 |
| Huang, 2016             | 1,95  | 0,31 | elderly   | 56.40 | Other | - | Gen med | 0,52 | cbt   | Grp   | 12 | cau    | East A | - | - | sr | - | 1 |
| Hummel, 2017            | 1,40  | 0,19 | older old | 81.90 | Other | - | Gen med | 0,80 | cbt   | Grp   | 13 | wl     | EU     | + | - | +  | + | 3 |
| Hunter, 2012 I          | 0,42  | 0,28 | adults    | 35.20 | Clin  | - | Other   | 0,48 | cbt   | Grp   | 18 | cau    | US     | - | - | sr | + | 2 |
| Husain, 2017            | 0,89  | 0,14 | adults    | 27.70 | Other | + | PPD     | 1,00 | cbt   | Grp   | 6  | cau    | Other  | - | + | +  | + | 3 |
| Israel, 2013            | 0,89  | 0,45 | adol      | 15.60 | Clin  | + | No      | 0,55 | other | Ind   | 11 | cau    | EU     | + | + | +  | + | 4 |
| Jamison, 1995           | 1,59  | 0,27 | adults    | 38.00 | Comm  | + | No      | 0,84 | cbt   | Gsh   | 4  | wl     | US     | - | - | -  | - | 0 |
| Jarett, 1999            | 0,58  | 0,24 | adults    | 39.60 | Comm  | + | No      | 0,68 | cbt   | Ind   | 20 | othctr | US     | - | + | +  | + | 3 |
| Jelinek, 2016           | 0,45  | 0,26 | adults    | 45.50 | Clin  | + | No      | 0,74 | 3rd   | Grp   | 7  | othctr | EU     | - | - | +  | + | 2 |
| Jeong, 2005             | -0,04 | 0,31 | adol      | 16.00 | Other | - | No      | 1,00 | other | Ind   | 36 | wl     | East A | - | + | sr | - | 2 |
| Jesse, 2015             | 0,34  | 0,20 | adults    | 25.10 | Other | - | PPD     | 1,00 | cbt   | Grp   | 6  | cau    | US     | + | + | sr | - | 3 |
| Jiang, 2014             | 1,05  | 0,08 | adults    | 27.30 | Other | - | PPD     | 1,00 | other | Other | 18 | cau    | East A | + | - | sr | - | 2 |
| Johansson, 2012         | 0,97  | 0,22 | adults    | 45.60 | Comm  | + | No      | 0,75 | dyn   | Gsh   | 9  | othctr | EU     | + | + | sr | + | 4 |
| Johansson, 2012 - stand | 0,56  | 0,28 | adults    | 44.70 | Comm  | + | No      | 0,71 | cbt   | Gsh   | 10 | othctr | EU     | + | + | sr | - | 3 |
| Johansson, 2012 - tayl  | 0,82  | 0,29 | adults    | 44.70 | Comm  | + | No      | 0,71 | cbt   | Gsh   | 8  | othctr | EU     | + | + | sr | - | 3 |
| Johnson, 2012           | 0,67  | 0,33 | adults    | 35.00 | Other | + | Other   | 1,00 | ipt   | Other | 27 | othctr | US     | - | + | +  | + | 3 |
| Joling, 2011            | 0,10  | 0,15 | older old | 81.50 | Other | - | No      | 0,74 | cbt   | Gsh   | 3  | cau    | EU     | + | + | sr | + | 4 |
| Kahn, 1990 - cbt        | 1,35  | 0,38 | children  | 12.10 | Other | + | No      | 0,51 | cbt   | Grp   | 12 | wl     | US     | - | - | -  | + | 1 |
| Kahn, 1990 - other      | 1,07  | 0,36 | children  | 12.10 | Other | + | No      | 0,51 | other | Ind   | 12 | wl     | US     | - | - | -  | - | 0 |
| Kamga, 2017             | 0,43  | 0,24 | older old | 76.00 | Other | - | Gen med | 0,63 | cbt   | Gsh   | 8  | wl     | Can    | + | + | sr | + | 4 |
| Kanter, 2015            | 0,13  | 0,30 | adults    | 38.10 | Clin  | + | Other   | 0,79 | bat   | Ind   | 8  | cau    | US     | + | - | +  | + | 3 |
| Keeley, 2016            | 0,40  | 0,16 | adults    | 47.50 | Clin  | + | No      | 0,71 | other | Ind   | 4  | cau    | US     | + | + | sr | + | 4 |
| Kelly, 1993 - cbt       | 0,48  | 0,33 | adults    | 34.00 | Comm  | - | Gen med | 0,00 | cbt   | Grp   | 8  | othctr | US     | - | - | sr | - | 1 |
| Kelly, 1993 - sup       | 1,04  | 0,39 | adults    | 34.00 | Comm  | - | Gen med | 0,00 | sup   | Grp   | 8  | othctr | US     | - | - | sr | - | 1 |
| Kenter, 2016            | -0,74 | 0,13 | adults    | 38.00 | Clin  | + | No      | 0,54 | pst   | Gsh   | 5  | wl     | EU     | + | + | sr | + | 4 |

|                         |       |      |          |       |       |   |         |      |       |       |    |        |        |   |   |    |   |   |
|-------------------------|-------|------|----------|-------|-------|---|---------|------|-------|-------|----|--------|--------|---|---|----|---|---|
| Kessler, 2009           | 0,61  | 0,14 | adults   | 34.90 | Clin  | + | No      | 0,68 | cbt   | Gsh   | 10 | wl     | UK     | + | + | sr | + | 4 |
| Kim, 2018               | 0,82  | 0,27 | adults   | 48.00 | Other | - | Gen med | 1,00 | cbt   | Other | 7  | cau    | East A | + | - | sr | - | 2 |
| King, 2000 - cbt        | 0,35  | 0,21 | adults   | 37.50 | Clin  | - | No      | 0,77 | sup   | Ind   | 6  | cau    | UK     | - | + | sr | + | 3 |
| King, 2000 - sup        | 0,51  | 0,21 | adults   | 37.50 | Clin  | - | No      | 0,77 | cbt   | Ind   | 6  | cau    | UK     | - | + | sr | + | 3 |
| Kivi, 2014              | -0,16 | 0,25 | adults   | 36.60 | Clin  | + | No      | 0,57 | cbt   | Gsh   | 5  | cau    | EU     | - | + | sr | - | 2 |
| Kleiboer, 2015          | 0,39  | 0,14 | adults   | 44.50 | Comm  | - | No      | 0,65 | pst   | Other | 2  | wl     | EU     | + | + | sr | + | 4 |
| Korrelboom, 2012        | 0,79  | 0,26 | adults   | 40.90 | Clin  | + | No      | 0,80 | other | Grp   | 8  | cau    | EU     | - | + | sr | + | 3 |
| Korte, 2012             | 0,51  | 0,14 | elderly  | 63.30 | Comm  | - | No      | 0,77 | lrt   | Grp   | 8  | wl     | EU     | + | + | sr | + | 4 |
| Kramer, 2014            | 0,32  | 0,12 | Young ad | 19.50 | Comm  | - | No      | 0,79 | other | Other | 5  | wl     | EU     | + | + | sr | + | 4 |
| Laidlaw, 2008           | 0,42  | 0,31 | elderly  | 74.00 | Clin  | + | No      | 0,73 | cbt   | Ind   | 8  | cau    | UK     | + | + | +  | - | 3 |
| Lamers, 2010            | 0,26  | 0,13 | elderly  | 70.70 | Other | + | Gen med | 0,47 | cbt   | Ind   | 4  | cau    | EU     | + | + | sr | + | 4 |
| Lamers, 2015            | 0,34  | 0,19 | elderly  | 56.90 | Comm  | - | No      | 0,77 | lrt   | Gsh   | 7  | wl     | EU     | + | + | sr | + | 4 |
| Landreville, 1997       | 0,30  | 0,41 | elderly  | 72.00 | Comm  | - | Gen med | 0,87 | cbt   | Gsh   | 4  | wl     | Can    | - | - | sr | - | 1 |
| Lappalainen, 2015       | 0,62  | 0,33 | adults   | 51.90 | Comm  | + | No      | 0,72 | 3rd   | Gsh   | 6  | wl     | EU     | - | + | sr | + | 3 |
| Larcombe, 1984          | 2,74  | 0,63 | adults   | 42.50 | Comm  | + | Gen med | 0,68 | cbt   | Grp   | 6  | wl     | Aus    | - | - | +  | - | 1 |
| Lemma, 2013             | -0,12 | 0,47 | adults   |       | Comm  | - | No      | 0,76 | dyn   | Other | 8  | othctr | UK     | - | - | sr | + | 2 |
| Lenze, 2017             | -0,41 | 0,31 | adults   | 26.60 | Comm  | + | PPD     | 1,00 | ipt   | Ind   | 8  | cau    | US     | + | + | sr | + | 4 |
| Lerner, 2015            | 0,60  | 0,10 | adults   | 54.70 | Other | + | Other   | 0,72 | cbt   | Other | 8  | cau    | US     | + | - | sr | + | 3 |
| Leung, 2013             | 0,33  | 0,20 | adults   |       | Other | - | PPD     | 1,00 | cbt   | Grp   | 6  | cau    | East A | - | - | sr | + | 2 |
| Leung, 2016             | 0,16  | 0,16 | adults   | 31.00 | Other | - | PPD     | 1,00 | cbt   | Grp   | 6  | othctr | East A | - | - | sr | - | 1 |
| Lewinsohn, 1990 - cwd   | 0,65  | 0,32 | adol     | 16.20 | Comm  | + | No      | 0,61 | cbt   | Grp   | 14 | wl     | US     | - | - | sr | - | 1 |
| Lewinsohn, 1990 - cwd+p | 1,42  | 0,36 | adol     | 16.20 | Comm  | + | No      | 0,65 | cbt   | Grp   | 14 | wl     | US     | - | - | sr | - | 1 |
| Lexis, 2011             | 0,28  | 0,17 | adults   | 47.70 | Other | - | Other   | 0,39 | pst   | Ind   | 8  | cau    | EU     | + | - | sr | + | 3 |
| Liddle, 1990            | 0,35  | 0,42 | children | 9.20  | Other | - | No      | 0,32 | cbt   | Grp   | 8  | wl     | Aus    | - | - | sr | - | 2 |
| Linde, 2011             | 0,15  | 0,14 | adults   | 52.20 | Other | - | Other   | 1,00 | cbt   | Grp   | 11 | othctr | US     | + | + | sr | + | 4 |
| Listug-Lunde, 2013      | -0,11 | 0,47 | children | 12.40 | Other | - | No      | 0,38 | cbt   | Grp   | 13 | cau    | US     | - | - | sr | - | 1 |
| Liu, 2009               | 0,29  | 0,27 | adults   | 26.40 | Comm  | - | No      | 0,73 | cbt   | Gsh   | 8  | wl     | East A | - | - | sr | - | 1 |
| Lloyd-Williams, 2018    | 0,13  | 0,34 | elderly  | 65.10 | Other | - | Gen med | 0,71 | other | Ind   | 1  | cau    | UK     | - | + | sr | + | 3 |
| Losada, 2015 act        | 0,92  | 0,26 | elderly  | 61.80 | Comm  | - | Other   | 0,84 | cbt   | Ind   | 8  | othctr | EU     | + | - | sr | - | 2 |
| Losada, 2015 cbt        | 0,79  | 0,26 | elderly  | 61.80 | Comm  | - | Other   | 0,84 | 3rd   | Ind   | 8  | othctr | EU     | + | - | sr | - | 2 |
| Lovell, 2008            | 0,18  | 0,31 | adults   | 37.60 | Clin  | - | No      | 0,74 | cbt   | Ind   | 4  | cau    | UK     | - | + | sr | + | 3 |
| Luby, 2012              | 0,26  | 0,31 | children | 4.30  | Comm  | + | No      | 0,37 | other | Ind   | 14 | othctr | US     | + | - | +  | + | 3 |
| Lundgren, 2016          | 0,27  | 0,28 | elderly  | 62.90 | Other | - | Gen med | 0,42 | cbt   | Gsh   | 7  | othctr | EU     | + | + | sr | + | 4 |
| Lustman, 1998           | 1,00  | 0,34 | adults   | 54.80 | Comm  | + | Gen med | 0,60 | cbt   | Ind   | 10 | cau    | US     | + | + | sr | - | 3 |
| Lynch, 1997             | 0,90  | 0,42 | adults   | 48.30 | Clin  | - | No      | 0,86 | pst   | Other | 6  | cau    | US     | - | - | sr | - | 1 |
| Lynch, 2004             | 0,02  | 0,42 | adults   | 38.50 | Clin  | - | No      | 0,83 | pst   | Other | 6  | othctr | US     | - | - | sr | - | 1 |
| MacPherson, 2013        | 0,28  | 0,11 | adults   | 43.50 | Clin  | - | No      | 0,73 | sup   | Ind   | 8  | cau    | UK     | + | + | sr | + | 4 |
| Maina, 2005 - bdt       | 0,99  | 0,55 | adults   | 36.80 | Clin  | + | No      | 0,63 | dyn   | Ind   | 20 | wl     | EU     | - | - | +  | + | 2 |
| Maina, 2005 - bsp       | 1,06  | 0,55 | adults   | 36.80 | Clin  | + | No      | 0,63 | sup   | Ind   | 19 | wl     | EU     | - | - | +  | + | 2 |
| Malouff, 1988 - pst     | 1,28  | 0,48 | adults   | 39.10 | Comm  | - | Other   | 0,66 | cbt   | Grp   | 4  | wl     | US     | - | - | sr | - | 1 |
| Malouff, 1988 - ret     | 1,50  | 0,50 | adults   | 39.10 | Comm  | - | Other   | 0,66 | pst   | Grp   | 4  | wl     | US     | - | - | sr | - | 1 |
| Martin, 2015            | 1,42  | 0,34 | adults   | 40.60 | Comm  | + | Gen med | 0,74 | cbt   | Ind   | 12 | cau    | Aus    | + | + | sr | - | 3 |
| Matsuzaka, 2017         | 0,02  | 0,22 | adults   | 43.80 | Clin  | + | No      | 0,94 | ipt   | Ind   | 4  | cau    | Other  | + | + | +  | + | 4 |
| McCarty, 2013           | 0,28  | 0,19 | children | 12.70 | Other | - | No      | 0,60 | cbt   | Grp   | 12 | othctr | US     | + | + | sr | + | 4 |

|                         |       |      |          |       |       |   |         |      |       |       |    |        |        |   |   |    |   |   |
|-------------------------|-------|------|----------|-------|-------|---|---------|------|-------|-------|----|--------|--------|---|---|----|---|---|
| McClay, 2015            | 0,85  | 0,43 | adults   | 43.70 | Comm  | - | No      | 0,65 | cbt   | Other | 4  | wl     | UK     | - | + | sr | - | 2 |
| McIndoo, 2016 bat       | 1,21  | 0,47 | Young ad | 19.20 | Comm  | - | No      | 0,62 | 3rd   | Ind   | 4  | wl     | US     | + | - | -  | + | 2 |
| McIndoo, 2016 mbct      | 0,88  | 0,40 | Young ad | 19.20 | Comm  | - | No      | 0,62 | bat   | Ind   | 4  | wl     | US     | + | - | -  | + | 2 |
| McKee, 2006             | 0,07  | 0,31 | adults   | 24.40 | Other | - | PPD     | 1,00 | cbt   | Ind   | 2  | cau    | US     | - | - | sr | - | 1 |
| Michalak, 2015 cbasp    | 0,62  | 0,32 | adults   | 50.80 | Comm  | + | No      | 0,62 | 3rd   | Grp   | 8  | cau    | EU     | + | + | +  | + | 4 |
| Michalak, 2015 mbct     | 0,41  | 0,32 | adults   | 50.80 | Comm  | + | No      | 0,62 | other | Other | 10 | cau    | EU     | + | + | +  | + | 4 |
| Milgrom, 2005 - cbt     | 0,48  | 0,51 | adults   | 29.70 | Other | + | PPD     | 1,00 | cbt   | Grp   | 9  | cau    | Aus    | + | + | sr | + | 4 |
| Milgrom, 2005 - grp sup | 0,70  | 0,51 | adults   | 29.70 | Other | + | PPD     | 1,00 | sup   | Grp   | 9  | cau    | Aus    | + | + | sr | + | 4 |
| Milgrom, 2005 - ind sup | 0,55  | 0,50 | adults   | 29.70 | Other | + | PPD     | 1,00 | sup   | Ind   | 9  | cau    | Aus    | + | + | sr | + | 4 |
| Milgrom, 2011 - nurse   | 0,72  | 0,36 | adults   | 31.50 | Other | - | PPD     | 1,00 | cbt   | Ind   | 5  | cau    | Aus    | + | + | sr | + | 4 |
| Milgrom, 2011 - psy     | 0,06  | 0,35 | adults   | 31.50 | Other | - | PPD     | 1,00 | cbt   | Ind   | 4  | cau    | Aus    | + | + | sr | + | 4 |
| Milgrom, 2015           | 0,57  | 0,30 | adults   | 31.80 | Comm  | + | PPD     | 1,00 | cbt   | Ind   | 6  | cau    | Aus    | + | + | sr | + | 4 |
| Milgrom, 2016           | 0,83  | 0,31 | adults   | 31.60 | Comm  | + | PPD     | 1,00 | cbt   | Gsh   | 6  | cau    | Aus    | + | + | sr | + | 4 |
| Miller, 2002            | 0,45  | 0,36 | adults   | 32.10 | Other | - | No      | 1,00 | ipt   | Other | 12 | cau    | US     | - | - | +  | - | 1 |
| Miranda, 2003           | 0,16  | 0,15 | adults   | 29.30 | Other | + | Other   | 1,00 | cbt   | Other | 8  | cau    | US     | + | + | +  | + | 4 |
| Mohr, 2000              | 0,57  | 0,35 | adults   | 42.40 | Other | - | Gen med | 0,72 | cbt   | Other | 8  | cau    | US     | - | - | sr | + | 2 |
| Mohr, 2011              | 0,29  | 0,22 | elderly  | 55.90 | Clin  | + | Other   | 0,09 | cbt   | Other | 16 | cau    | US     | - | - | +  | + | 2 |
| Mohr, 2013              | 0,52  | 0,25 | adults   | 48.30 | Comm  | + | No      | 0,72 | cbt   | Gsh   | 18 | wl     | US     | + | + | sr | + | 4 |
| Moldovan, 2013          | 0,59  | 0,31 | Young ad | 23.00 | Comm  | - | No      | 0,88 | cbt   | Gsh   | 4  | othctr | EU     | + | + | sr | + | 4 |
| Mossey, 1996            | 0,21  | 0,27 | elderly  | 71.00 | Other | - | Gen med | 0,78 | ipt   | Ind   | 10 | cau    | US     | - | - | sr | - | 1 |
| Mufson, 1999            | 0,65  | 0,29 | adol     | 15.80 | Clin  | + | No      | 0,73 | ipt   | Ind   | 12 | othctr | US     | + | - | +  | + | 3 |
| Mufson, 2004            | 0,49  | 0,25 | adol     | 15.10 | Clin  | + | No      | 0,84 | ipt   | Ind   | 12 | cau    | US     | + | - | +  | + | 3 |
| Mukhtar, 2011           | 4,83  | 0,37 | adults   | 40.50 | Clin  | + | No      | 0,55 | cbt   | Grp   | 8  | wl     | East A | - | - | sr | - | 1 |
| Mulcahey, 2010          | 0,60  | 0,29 | adults   | 32.20 | Clin  | + | PPD     | 1,00 | ipt   | Other | 11 | cau    | Aus    | + | - | -  | - | 1 |
| Mynors-Wallis, 1995     | 0,68  | 0,27 | adults   | 37.10 | Clin  | + | No      | 0,77 | pst   | Ind   | 6  | othctr | UK     | - | + | +  | - | 2 |
| Naeem, 2013             | 1,12  | 0,16 | adults   | 33.40 | Clin  | + | No      | 0,56 | cbt   | Gsh   | 8  | cau    | Other  | + | + | sr | + | 4 |
| Naeem, 2015             | 0,86  | 0,18 | adults   | 31.70 | Clin  | + | No      | 0,60 | cbt   | Other | 7  | cau    | Other  | + | + | sr | + | 4 |
| Nakagawa, 2017          | 0,17  | 0,22 | adults   | 40.60 | Clin  | + | No      | 0,36 | cbt   | Ind   | 15 | cau    | East A | + | + | +  | + | 4 |
| Nakimuli, 2015          | 0,05  | 0,19 | adults   | 44.50 | Other | + | Gen med | 0,42 | other | Grp   | 8  | othctr | Other  | + | + | sr | + | 4 |
| Nasrin, 2017            | 1,74  | 0,39 | adults   | 36.30 | Clin  | + | No      | 0,59 | bat   | Ind   | 1  | wl     | UK     | + | + | sr | - | 3 |
| Neugebauer, 2006        | 0,15  | 0,44 | adults   | 29.70 | Other | - | Other   | 1,00 | ipt   | Other | 6  | cau    | US     | - | - | +  | + | 2 |
| Newby, 2014             | 0,10  | 0,31 | adults   | 26.30 | Comm  | - | No      | 0,44 | cbt   | Ind   | 1  | cau    | Aus    | - | - | sr | + | 2 |
| Newby, 2017             | 0,92  | 0,24 | adults   | 46.70 | Comm  | + | Gen med | 0,71 | cbt   | Gsh   | 6  | wl     | Aus    | + | + | sr | + | 4 |
| Nezu, 1986 - pf         | 0,85  | 0,65 | adults   | 41.70 | Comm  | + | No      | 0,77 | pst   | Grp   | 8  | wl     | US     | - | - | sr | - | 1 |
| Nezu, 1986 - pst        | 3,26  | 0,89 | adults   | 41.70 | Comm  | + | No      | 0,77 | pst   | Grp   | 8  | wl     | US     | - | - | sr | - | 1 |
| Nezu, 1989 - apst       | 1,61  | 0,53 | adults   | 41.70 | Comm  | + | No      | 0,77 | pst   | Grp   | 10 | wl     | US     | - | - | +  | - | 1 |
| Nezu, 1989 - pst        | 3,09  | 0,68 | adults   | 41.70 | Comm  | + | No      | 0,77 | pst   | Grp   | 10 | wl     | US     | - | - | +  | - | 1 |
| Ng, 2013                | 1,43  | 0,43 | elderly  |       | Comm  | - | No      |      | lrt   | Ind   | 5  | cau    | East A | - | - | sr | - | 1 |
| Ngai, 2015              | 0,42  | 0,07 | adults   | 30.80 | Other | - | PPD     | 1,00 | cbt   | Other | 5  | cau    | East A | + | + | sr | + | 4 |
| Nobis, 2015             | 0,86  | 0,13 | adults   | 51.00 | Comm  | - | Gen med | 0,63 | other | Gsh   | 6  | othctr | EU     | + | - | sr | + | 3 |
| Nollett, 2016           | -0,07 | 0,31 | elderly  | 70.30 | Other | - | Gen med | 0,59 | pst   | Ind   | 6  | cau    | UK     | + | + | sr | - | 3 |
| Nystrom, 2017 BA-L      | 0,66  | 0,24 | adults   | 42.00 | Comm  | + | No      | 0,76 | bat   | Gsh   | 8  | wl     | EU     | + | + | sr | + | 4 |
| Nystrom, 2017 BA-M      | 1,11  | 0,24 | adults   | 42.00 | Comm  | + | No      | 0,76 | bat   | Gsh   | 8  | wl     | EU     | + | + | sr | + | 4 |
| O'Hara, 2000            | 1,19  | 0,22 | adults   | 29.60 | Other | + | PPD     | 1,00 | ipt   | Ind   | 12 | wl     | US     | + | - | -  | + | 2 |

|                         |       |      |          |       |       |   |         |      |       |       |    |        |        |   |   |    |   |   |
|-------------------------|-------|------|----------|-------|-------|---|---------|------|-------|-------|----|--------|--------|---|---|----|---|---|
| O'Mahen, 2013a          | 1,09  | 0,21 | adults   | 27.10 | Other | + | PPD     | 0,57 | cbt   | Ind   | 8  | cau    | UK     | + | + | sr | + | 2 |
| O'Neil, 2014            | 3,66  | 0,44 | elderly  | 60.00 | Other | - | Gen med | 1,00 | cbt   | Other | 8  | cau    | Aus    | + | + | sr | + | 4 |
| Olukolade, 2017         | 1,61  | 0,35 | adults   |       | Other | - | Gen med | 0,67 | cbt   | Ind   | 9  | wl     | Other  | + | - | sr | - | 1 |
| Omidi, 2013 - cbt       | 1,78  | 0,36 | adults   | 32.30 | Clin  | + | No      | 0,67 | 3rd   | Grp   | 8  | cau    | Other  | - | - | sr | - | 1 |
| Omidi, 2013 - mbct      | 0,12  | 0,18 | adults   | 32.30 | Clin  | + | No      | 0,25 | cbt   | Grp   | 8  | cau    | Other  | - | - | sr | - | 4 |
| Onyechi, 2016           | 12,26 | 1,04 | adults   | 52.80 | Other | - | Gen med | 0,69 | cbt   | Ind   | 18 | othctr | Other  | - | - | sr | - | 1 |
| Pace, 1993              | 0,74  | 0,24 | Young ad | 22.10 | Other | - | No      | 0,78 | cbt   | Ind   | 7  | wl     | US     | - | - | sr | - | 1 |
| Pagoto, 2013            | 0,43  | 0,19 | adults   | 45.90 | Comm  | + | Other   | 1,00 | bat   | Other | 18 | othctr | US     | + | + | +  | + | 4 |
| Patel, 2017             | 0,52  | 0,09 | adults   | 42.50 | Clin  | - | No      | 0,77 | bat   | Ind   | 6  | cau    | Other  | + | + | sr | + | 4 |
| Pecheur, 1984- rcbm     | 1,85  | 0,70 | Young ad | 24.00 | Comm  | + | No      | 0,90 | cbt   | Ind   | 8  | wl     | US     | - | - | +  | - | 1 |
| Pecheur, 1984- scbm     | 2,18  | 0,74 | Young ad | 24.00 | Comm  | + | No      | 0,90 | cbt   | Ind   | 8  | wl     | US     | - | - | +  | - | 1 |
| Peden, 2000             | 1,13  | 0,32 | Young ad | 19.30 | Comm  | - | No      | 1,00 | cbt   | Grp   | 6  | cau    | US     | - | - | sr | - | 1 |
| Penckofer, 2012         | 0,78  | 0,26 | adults   | 54.40 | Comm  | - | Gen med | 1,00 | cbt   | Grp   | 8  | cau    | US     | + | - | sr | + | 3 |
| Perini, 2009            | 0,56  | 0,31 | adults   | 49.30 | Comm  | + | No      | 0,78 | cbt   | Gsh   | 6  | wl     | Aus    | + | - | sr | - | 2 |
| Petersen, 2014          | 0,92  | 0,35 | adults   | 36.50 | Other | + | Gen med | 0,74 | ipt   | Grp   | 8  | cau    | Other  | + | - | sr | - | 2 |
| Pibernik, 2009          | 0,17  | 0,28 | elderly  | 56.50 | Other | - | Gen med | 0,74 | cbt   | Grp   | 4  | cau    | EU     | - | + | sr | - | 2 |
| Pibernik, 2015          | 0,08  | 0,18 | elderly  | 58.10 | Other | - | Gen med | 0,54 | cbt   | Grp   | 6  | cau    | EU     | + | + | sr | + | 4 |
| Poleshuck, 2014         | 0,17  | 0,28 | adults   | 36.70 | Other | + | Gen med | 1,00 | ipt   | Ind   | 4  | cau    | US     | + | - | -  | + | 2 |
| Pot, 2010               | 0,39  | 0,15 | elderly  | 64.30 | Comm  | - | No      | 0,73 | lrt   | Grp   | 12 | othctr | EU     | - | + | sr | + | 3 |
| Pots, 2014              | 0,49  | 0,16 | adults   | 47.90 | Comm  | - | No      | 0,78 | 3rd   | Grp   | 11 | wl     | EU     | + | + | sr | + | 4 |
| Pots, 2016              | 0,56  | 0,16 | adults   | 46.90 | Comm  | - | No      | 0,76 | 3rd   | Gsh   | 9  | wl     | EU     | + | + | sr | + | 4 |
| Power, 2012 - cbt       | 0,36  | 0,48 | adults   | 36.10 | Clin  | + | No      | 0,62 | cbt   | Ind   | 16 | cau    | UK     | - | - | sr | + | 2 |
| Power, 2012 - ipt       | 0,66  | 0,47 | adults   | 36.10 | Clin  | + | No      | 0,62 | ipt   | Ind   | 16 | cau    | UK     | - | - | sr | + | 2 |
| Prendergast, 2001       | 0,10  | 0,33 | adults   | 32.20 | Other | + | PPD     | 1,00 | cbt   | Ind   | 6  | othctr | Aus    | + | - | -  | - | 1 |
| Preschl, 2012           | 0,71  | 0,34 | elderly  | 70.00 | Comm  | - | No      | 0,67 | lrt   | Ind   | 6  | wl     | EU     | + | - | sr | + | 3 |
| Propst, 1992 - nrcbt-nt | -0,37 | 0,62 | adults   | 40.00 | Comm  | - | Other   | 0,83 | cbt   | Ind   | 19 | cau    | US     | - | - | +  | - | 1 |
| Propst, 1992 - nrcbt-rt | 0,22  | 0,62 | adults   | 40.00 | Comm  | - | Other   | 0,83 | cbt   | Ind   | 19 | cau    | US     | - | - | +  | - | 1 |
| Propst, 1992 - rcbt-nt  | 0,48  | 0,63 | adults   | 40.00 | Comm  | - | Other   | 0,83 | cbt   | Ind   | 19 | cau    | US     | - | - | +  | - | 1 |
| Propst, 1992 - rcbt-rt  | -0,01 | 0,61 | adults   | 40.00 | Comm  | - | Other   | 0,83 | cbt   | Ind   | 19 | cau    | US     | - | - | +  | - | 1 |
| Puckering, 2010         | 0,82  | 0,58 | adults   |       | Other | - | PPD     | 1,00 | other | Grp   | 14 | wl     | UK     | + | - | sr | - | 2 |
| Pugh, 2016              | 0,97  | 0,32 | adults   | 30.80 | Comm  | - | PPD     | 1,00 | cbt   | Gsh   | 6  | wl     | Can    | + | + | sr | - | 3 |
| Qiu, 2013               | 2,17  | 0,32 | adults   | 50.60 | Other | + | Gen med | 1,00 | cbt   | Grp   | 10 | wl     | East A | + | + | +  | + | 4 |
| Rahman, 2008            | 0,72  | 0,07 | adults   | 26.70 | Other | + | PPD     | 1,00 | cbt   | Grp   | 16 | othctr | Other  | + | + | +  | - | 3 |
| Ransom, 2008            | 0,16  | 0,22 | adults   | 44.40 | Comm  | + | Gen med | 0,16 | ipt   | Other | 6  | cau    | US     | - | - | sr | + | 2 |
| Rehm, 1981 - sc         | 0,84  | 0,62 | adults   | 39.20 | Comm  | - | No      | 1,00 | other | Grp   | 7  | wl     | US     | - | - | +  | - | 1 |
| Rehm, 1981 - sm+se      | 0,39  | 0,55 | adults   | 39.20 | Comm  | - | No      | 1,00 | other | Grp   | 7  | wl     | US     | - | - | +  | - | 1 |
| Rehm, 1981 - sm+se+sr   | 0,35  | 0,59 | adults   | 39.20 | Comm  | - | No      | 1,00 | other | Grp   | 7  | wl     | US     | - | - | +  | - | 1 |
| Rehm, 1981 - sm+sr      | 0,36  | 0,55 | adults   | 39.20 | Comm  | - | No      | 1,00 | other | Grp   | 7  | wl     | US     | - | - | +  | - | 1 |
| Reynolds, 1986          | 1,57  | 0,57 | adol     | 15.70 | Other | - | No      | 0,63 | cbt   | Grp   | 10 | wl     | US     | - | - | -  | - | 0 |
| Richards, 2015          | 0,65  | 0,15 | adults   | 39.90 | Comm  | - | No      | 0,73 | cbt   | Gsh   | 7  | wl     | EU     | - | + | sr | + | 3 |
| Richards, 2018          | -0,43 | 0,39 | elderly  | 65.30 | Other | - | Gen med | 0,48 | bat   | Ind   | 8  | cau    | UK     | + | + | sr | + | 4 |
| Rief, 2018 - cbasp      | 0,55  | 0,31 | adults   | 39.60 | Clin  | + | No      | 0,58 | other | Ind   | 16 | wl     | EU     | + | + | sr | + | 4 |
| Rief, 2018 - cbt-e      | 0,77  | 0,31 | adults   | 37.30 | Clin  | + | No      | 0,52 | cbt   | Ind   | 16 | wl     | EU     | + | + | sr | + | 4 |
| Rief, 2018 - cbt-m      | 0,68  | 0,31 | adults   | 37.50 | Clin  | + | No      | 0,51 | cbt   | Ind   | 16 | wl     | EU     | + | + | sr | + | 4 |

|                        |       |      |           |       |       |   |         |      |       |       |    |        |     |   |   |    |   |   |
|------------------------|-------|------|-----------|-------|-------|---|---------|------|-------|-------|----|--------|-----|---|---|----|---|---|
| Rizvi, 2015            | 0,15  | 0,36 | adults    | 42.40 | Clin  | + | No      | 0,74 | cbt   | Ind   | 14 | wl     | Can | - | - | sr | - | 0 |
| Rohan, 2007            | 0,96  | 0,38 | adults    | 45.00 | Comm  | + | No      | 0,90 | cbt   | Grp   | 10 | wl     | US  | + | - | +  | + | 3 |
| Rohde, 2004            | 0,28  | 0,21 | adol      | 15.10 | Other | + | Other   | 0,48 | cbt   | Grp   | 16 | othctr | US  | + | - | +  | + | 3 |
| Rohde, 2016            | 0,71  | 0,27 | Young ad  | 21.80 | Comm  | - | No      | 0,68 | cbt   | Grp   | 6  | othctr | US  | + | - | +  | + | 3 |
| Rohricht, 2013         | 0,92  | 0,42 | adults    | 47.70 | Clin  | + | No      | 0,42 | other | Grp   | 8  | wl     | UK  | + | + | +  | + | 4 |
| Rosello, 1999 - CBT    | 0,34  | 0,32 | adol      | 14.70 | Other | + | No      | 0,54 | cbt   | Other | 12 | wl     | US  | - | - | sr | - | 2 |
| Rosello, 1999 - IPT    | 0,74  | 0,33 | adol      | 14.70 | Other | + | No      | 0,54 | ipt   | Other | 12 | wl     | US  | - | - | sr | - | 2 |
| Ross, 1985             | 1,48  | 0,35 | adults    | 33.00 | Clin  | + | No      | 0,63 | cbt   | Other | 12 | wl     | UK  | - | - | 2  | - | 1 |
| Rosso, 2017            | 0,83  | 0,24 | adults    | 29.00 | Comm  | + | No      | 0,69 | cbt   | Gsh   | 6  | othctr | US  | - | - | +  | + | 2 |
| Rude, 1986             | 1,03  | 0,33 | adults    | 40.00 | Comm  | - | No      | 1,00 | other | Grp   | 12 | wl     | US  | - | - | sr | - | 1 |
| Ruwaard, 2009          | 0,73  | 0,29 | adults    | 42.00 | Comm  | - | No      | 0,69 | cbt   | Gsh   | 8  | wl     | EU  | + | - | sr | + | 3 |
| Sadler, 2018           | 2,63  | 0,39 | older old | 75.00 | Clin  | + | No      | 0,56 | cbt   | Grp   | 8  | othctr | Aus | + | - | sr | + | 3 |
| Safren, 2009           | 0,65  | 0,30 | adults    |       | Comm  | + | Gen med | 0,16 | cbt   | Ind   | 10 | cau    | US  | - | - | +  | + | 2 |
| Safren, 2014           | 0,65  | 0,22 | elderly   | 56.80 | Other | + | Gen med | 0,49 | cbt   | Ind   | 10 | cau    | US  | + | + | +  | - | 3 |
| Safren, 2016 cbt       | 0,42  | 0,23 | adults    | 47.50 | Comm  | + | Gen med | 0,31 | cbt   | Ind   | 11 | cau    | US  | + | - | +  | + | 3 |
| Safren, 2016 sup       | 0,34  | 0,22 | adults    | 47.50 | Comm  | + | Gen med | 0,31 | sup   | Ind   | 11 | cau    | US  | + | - | +  | + | 3 |
| Saloheimo, 2016 cwd    | 0,41  | 0,29 | adults    | 41.70 | Clin  | + | No      | 0,72 | ipt   | Ind   | 13 | cau    | EU  | + | + | +  | - | 3 |
| Saloheimo, 2016 ipt    | -0,05 | 0,28 | adults    | 41.70 | Clin  | + | No      | 0,72 | cbt   | Grp   | 11 | cau    | EU  | + | + | +  | - | 3 |
| Sanford, 2006          | 0,23  | 0,35 | adol      | 15.90 | Clin  | + | No      | 0,65 | other | Other | 12 | cau    | Can | + | + | sr | + | 3 |
| Santomauro, 2016       | 0,62  | 0,44 | adol      | 15.70 | Comm  | - | Other   | 0,40 | cbt   | Grp   | 11 | wl     | Aus | + | - | sr | + | 3 |
| Savard, 2006           | 0,67  | 0,34 | adults    | 51.60 | Comm  | - | Gen med | 1,00 | cbt   | Ind   | 8  | wl     | Can | + | + | +  | - | 3 |
| Schmidt, 1983 - bibl   | 1,53  | 0,67 | adults    | 42.00 | Comm  | - | No      | 0,84 | cbt   | Ind   | 7  | wl     | US  | - | - | sr | - | 1 |
| Schmidt, 1983 - ind    | 1,67  | 0,68 | adults    | 42.00 | Comm  | - | No      | 0,84 | cbt   | Grp   | 7  | wl     | US  | - | - | sr | - | 1 |
| Schmidt, 1983 - lgrp   | 0,60  | 0,62 | adults    | 42.00 | Comm  | - | No      | 0,84 | cbt   | Grp   | 7  | wl     | US  | - | - | sr | - | 1 |
| Schmidt, 1983 - sm grp | 1,39  | 0,67 | adults    | 42.00 | Comm  | - | No      | 0,84 | cbt   | Gsh   | 6  | wl     | US  | - | - | sr | - | 1 |
| Schulberg, 1996        | 0,44  | 0,15 | adults    | 38.10 | Clin  | + | No      | 0,83 | ipt   | Ind   | 16 | cau    | US  | - | - | +  | + | 2 |
| Schuster, 2017         | 0,85  | 0,30 | adults    | 45.90 | Comm  | - | No      | 0,68 | other | Grp   | 8  | wl     | EU  | + | - | sr | + | 3 |
| Scogin, 1987           | 0,83  | 0,48 | elderly   | 70.50 | Comm  | - | No      | 0,79 | cbt   | Gsh   | 4  | othctr | US  | - | - | -  | - | 0 |
| Scogin, 1989 - beh     | 0,36  | 0,38 | elderly   | 68.30 | Comm  | - | No      | 0,85 | cbt   | Gsh   | 4  | wl     | US  | - | - | -  | - | 0 |
| Scogin, 1989 - cogn    | 1,14  | 0,40 | elderly   | 68.30 | Comm  | - | No      | 0,85 | cbt   | Gsh   | 4  | wl     | US  | - | - | -  | - | 0 |
| Scogin, 2014           | 0,40  | 0,17 | older old | 75.40 | Comm  | - | No      | 0,83 | cbt   | Ind   | 12 | othctr | US  | + | + | sr | + | 4 |
| Scogin, 2018           | 1,48  | 0,47 | elderly   | 59.00 | Other | - | No      | 0,90 | cbt   | Other | 10 | cau    | US  | - | - | +  | + | 2 |
| Scott, 1990 - cgt      | 0,82  | 0,38 | adults    | 33.00 | Clin  | + | No      | 0,70 | cbt   | Grp   | 12 | wl     | UK  | - | - | sr | + | 2 |
| Scott, 1990 - ict      | 0,55  | 0,35 | adults    | 33.00 | Clin  | + | No      | 0,70 | cbt   | Ind   | 12 | wl     | UK  | - | - | sr | + | 2 |
| Scott, 1992 - cbt      | 0,25  | 0,31 | adults    | 31.80 | Clin  | + | No      | 0,75 | cbt   | Ind   | 16 | cau    | UK  | - | + | +  | + | 3 |
| Scott, 1992 - sup      | 0,55  | 0,32 | adults    | 31.80 | Clin  | + | No      | 0,75 | sup   | Ind   | 16 | cau    | UK  | - | + | +  | + | 3 |
| Scott, 1997            | 0,47  | 0,34 | adults    | 41.00 | Clin  | + | No      | 0,67 | cbt   | Ind   | 6  | cau    | UK  | - | - | +  | - | 1 |
| Segre, 2015            | 0,25  | 0,27 | adults    | 26.30 | Other | - | Other   | 1,00 | other | Ind   | 5  | wl     | US  | + | - | +  | + | 3 |
| Selmi, 1990 - ccbt     | 1,36  | 0,54 | adults    | 28.20 | Comm  | + | No      | 0,64 | cbt   | Gsh   | 6  | wl     | US  | - | - | +  | + | 2 |
| Selmi, 1990 - icbt     | 1,06  | 0,51 | adults    | 28.20 | Comm  | + | No      | 0,64 | cbt   | Ind   | 6  | wl     | US  | - | - | +  | + | 2 |
| Serfaty, 2009          | 0,17  | 0,18 | elderly   | 74.10 | Comm  | + | No      | 0,79 | cbt   | Ind   | 7  | cau    | UK  | + | + | sr | + | 4 |
| Serrano, 2004          | 0,95  | 0,32 | older old | 77.20 | Other | - | No      | 0,77 | lrt   | Ind   | 4  | cau    | EU  | - | - | sr | - | 1 |
| Serrano, 2012          | 0,39  | 0,47 | elderly   | 73.90 | Clin  | + | No      | 0,84 | lrt   | Ind   | 4  | othctr | EU  | - | - | +  | + | 2 |
| Shaw, 1977 - ba        | 1,29  | 0,68 | Young ad  | 20.10 | Comm  | - | No      | 0,69 | cbt   | Grp   | 8  | othctr | Can | - | - | sr | - | 1 |

|                            |       |      |          |       |       |   |         |      |       |       |    |        |        |   |   |    |   |   |
|----------------------------|-------|------|----------|-------|-------|---|---------|------|-------|-------|----|--------|--------|---|---|----|---|---|
| Shaw, 1977 - cbt           | 2,77  | 0,86 | Young ad | 20.10 | Comm  | - | No      | 0,69 | bat   | Grp   | 8  | othctr | Can    | - | - | sr | - | 1 |
| Shaw, 1977 - sup           | 1,60  | 0,71 | Young ad | 20.10 | Comm  | - | No      | 0,69 | sup   | Grp   | 8  | othctr | Can    | - | - | sr | - | 1 |
| Sheeber, 2012              | 0,84  | 0,25 | adults   | 31.00 | Other | - | PPD     | 1,00 | cbt   | Gsh   | 6  | wl     | US     | + | + | sr | + | 4 |
| Sheeber, 2017              | 0,31  | 0,12 | adults   | 31.80 | Comm  | - | PPD     | 1,00 | cbt   | Gsh   | 7  | othctr | US     | - | + | sr | + | 3 |
| Simoni, 2013               | -0,16 | 0,31 | adults   | 46.00 | Comm  | - | Gen med | 0,28 | cbt   | Ind   | 11 | cau    | US     | + | + | +  | + | 4 |
| Simpson, 2003              | -0,06 | 0,17 | adults   | 43.00 | Clin  | + | No      | 0,80 | dyn   | Ind   | 5  | cau    | UK     | + | + | sr | + | 4 |
| Simson, 2008               | 0,23  | 0,36 | elderly  | 60.50 | Other | - | Gen med | 0,43 | sup   | Ind   | 5  | cau    | EU     | - | - | sr | + | 2 |
| Sinniah, 2017              | 0,71  | 0,25 | adults   | 43.10 | Clin  | + | Other   | 0,70 | cbt   | Ind   | 16 | cau    | East A | - | - | sr | + | 2 |
| Sloane, 1985               | 0,09  | 0,34 | elderly  | 64.40 | Other | + | No      | 0,53 | ipt   | Ind   | 6  | othctr | US     | - | - | -  | - | 0 |
| Smit, 2006                 | -0,15 | 0,27 | adults   | 42.80 | Clin  | + | No      | 0,64 | cbt   | Ind   | 14 | cau    | EU     | + | + | -  | - | 4 |
| Smith, 2017 I              | 0,88  | 0,23 | adults   | 39.90 | Comm  | + | No      | 0,82 | cbt   | Gsh   | 6  | othctr | Aus    | + | + | sr | + | 4 |
| Songprakun, 2012           | 0,60  | 0,27 | adults   | 42.10 | Clin  | + | No      | 0,73 | cbt   | Gsh   | 8  | cau    | East A | + | + | sr | - | 3 |
| Spek, 2007                 | 0,30  | 0,14 | elderly  | 55.00 | Comm  | - | No      | 0,63 | cbt   | Grp   | 9  | wl     | EU     | + | + | sr | + | 4 |
| Spinelli, 2003             | 0,78  | 0,55 | adults   | 28.80 | Comm  | + | PPD     | 1,00 | ipt   | Ind   | 16 | othctr | US     | - | - | -  | + | 1 |
| Spinelli, 2012             | -0,15 | 0,25 | adults   | 29.50 | Other | + | PPD     | 1,00 | ipt   | Other | 12 | othctr | US     | + | - | -  | - | 1 |
| Sreevani, 2013             | 0,92  | 0,37 | adults   | 28.00 | Clin  | + | No      | 0,60 | other | Grp   | 4  | cau    | Other  | + | - | sr | - | 2 |
| Stallard, 2012             | 0,05  | 0,08 | adol     | 14.30 | Other | - | No      | 0,65 | cbt   | Other | 11 | cau    | UK     | + | + | sr | + | 4 |
| Stark, 1987 - pst          | 0,67  | 0,45 | children | 11.20 | Other | - | No      | 0,43 | other | Grp   | 12 | wl     | US     | - | - | +  | - | 1 |
| Stark, 1987 - selfcontrol  | 0,58  | 0,46 | children | 11.20 | Other | - | No      | 0,43 | pst   | Grp   | 12 | wl     | US     | - | - | +  | - | 1 |
| Stice, 2007 - cbt          | 0,71  | 0,19 | Young ad | 18.40 | Comm  | - | No      | 0,70 | cbt   | Grp   | 4  | wl     | US     | - | - | sr | + | 2 |
| Stice, 2007 - supp-expr    | 1,07  | 0,27 | Young ad | 18.40 | Comm  | - | No      | 0,70 | sup   | Grp   | 4  | wl     | US     | - | - | sr | + | 2 |
| Stice, 2008 - cbt          | 0,56  | 0,15 | adol     | 15.60 | Comm  | - | No      | 0,56 | cbt   | Grp   | 4  | cau    | US     | + | + | +  | + | 4 |
| Stice, 2008 - supp-expr    | 0,21  | 0,15 | adol     | 15.60 | Comm  | - | No      | 0,56 | sup   | Grp   | 4  | cau    | US     | + | + | +  | + | 4 |
| Stiles-Shields, 2018 - bat | 0,98  | 0,55 | adults   |       | Comm  | - | No      |      | bat   | Gsh   | 6  | wl     | US     | + | + | sr | - | 3 |
| Stiles-Shields, 2018 - cbt | 1,58  | 0,63 | adults   |       | Comm  | - | No      |      | cbt   | Gsh   | 6  | wl     | US     | + | + | sr | - | 3 |
| Strauss, 2012              | 1,83  | 0,44 | adults   | 43.00 | Clin  | + | No      | 0,71 | cbt   | Grp   | 9  | cau    | UK     | - | - | sr | + | 2 |
| Strong, 2008               | 0,37  | 0,14 | elderly  | 56.60 | Other | + | Gen med | 0,71 | pst   | Ind   | 10 | cau    | UK     | + | + | sr | + | 4 |
| Sugg, 2018                 | 0,64  | 0,26 | adults   | 49.20 | Comm  | + | No      | 0,61 | other | Ind   | 8  | cau    | UK     | + | + | sr | + | 4 |
| Swartz, 2008               | 0,85  | 0,32 | adults   | 42.70 | Comm  | + | Other   | 1,00 | ipt   | Ind   | 9  | cau    | US     | - | - | -  | - | 0 |
| Szigethy, 2007             | 0,68  | 0,32 | adol     | 15.00 | Other | - | Gen med | 0,51 | cbt   | Ind   | 10 | cau    | US     | - | - | +  | + | 2 |
| TADS, 2004                 | -0,07 | 0,13 | adol     | 14.60 | Comm  | + | No      | 0,54 | cbt   | Ind   | 15 | othctr | US     | + | + | +  | + | 4 |
| Takagaki, 2016             | 0,89  | 0,19 | Young ad | 18.20 | Other | - | No      | 0,38 | bat   | Grp   | 5  | cau    | East A | + | + | sr | + | 4 |
| Talbot, 2011               | 0,31  | 0,28 | adults   | 36.00 | Clin  | + | Other   | 1,00 | ipt   | Ind   | 13 | cau    | US     | - | - | -  | + | 1 |
| Taylor, 1977 - ba          | 1,20  | 0,77 | Young ad | 22.40 | Comm  | - | No      | 0,71 | cbt   | Ind   | 6  | wl     | Can    | - | - | sr | - | 1 |
| Taylor, 1977 - cbt         | 1,91  | 0,86 | Young ad | 22.40 | Comm  | - | No      | 0,71 | bat   | Ind   | 6  | wl     | Can    | - | - | sr | - | 1 |
| Taylor, 1977 - ct          | 1,76  | 0,85 | Young ad | 22.40 | Comm  | - | No      | 0,71 | cbt   | Ind   | 6  | wl     | Can    | - | - | sr | - | 1 |
| Taylor, 2009               | 1,58  | 0,36 | elderly  | 62.20 | Comm  | - | No      | 0,67 | cbt   | Ind   | 15 | wl     | US     | - | - | +  | + | 2 |
| Teasdale, 1984             | 1,46  | 0,46 | adults   | 37.50 | Clin  | + | No      | 0,94 | cbt   | Ind   | 15 | cau    | UK     | - | - | sr | - | 1 |
| Teichman, 1995 - ind       | 0,26  | 0,42 | adults   | 47.90 | Clin  | + | No      | 0,53 | cbt   | Ind   | 13 | wl     | Other  | - | - | sr | - | 1 |
| Teichman, 1995 - mar       | 1,24  | 0,46 | adults   | 47.90 | Clin  | + | No      | 0,53 | cbt   | Other | 13 | wl     | Other  | - | - | sr | - | 1 |
| Teri, 1997 - ba            | 0,88  | 0,49 | adults   | 76.40 | Other | + | Gen med | 0,47 | bat   | Other | 9  | cau    | US     | - | - | +  | - | 1 |
| Teri, 1997 - pst           | 1,16  | 0,51 | adults   | 76.40 | Other | + | Gen med | 0,47 | pst   | Other | 9  | cau    | US     | - | - | +  | - | 1 |
| Titov, 2010 - icbt-clin    | 0,98  | 0,28 | adults   | 43.00 | Comm  | + | No      | 0,74 | cbt   | Gsh   | 6  | wl     | Aus    | + | - | sr | - | 2 |
| Titov, 2010 - icbt-techn   | 0,96  | 0,28 | adults   | 43.00 | Comm  | + | No      | 0,74 | cbt   | Gsh   | 6  | wl     | Aus    | + | - | sr | - | 2 |

|                           |       |      |          |       |       |   |         |      |       |       |    |        |       |   |   |    |   |   |
|---------------------------|-------|------|----------|-------|-------|---|---------|------|-------|-------|----|--------|-------|---|---|----|---|---|
| Titov, 2015               | 2,25  | 0,35 | elderly  | 65.30 | Comm  | - | No      | 0,73 | cbt   | Gsh   | 5  | wl     | Aus   | + | + | sr | + | 4 |
| Tobin, 2017               | 0,05  | 0,11 | adults   | 43.60 | Comm  | - | Gen med | 0,43 | cbt   | Other | 10 | othctr | US    | + | + | sr | + | 4 |
| Tomasino, 2017 - icbt     | 0,70  | 0,51 | elderly  | 69.60 | Comm  | - | No      | 0,68 | cbt   | Gsh   | 12 | wl     | US    | - | - | sr | - | 1 |
| Tomasino, 2017 - icbt+sup | 0,38  | 0,46 | elderly  | 69.60 | Comm  | - | No      | 0,68 | cbt   | Gsh   | 11 | wl     | US    | - | - | sr | - | 1 |
| Tovote, 2014 - cbt        | 0,61  | 0,31 | adults   | 53.10 | Other | - | Gen med | 0,49 | 3rd   | Ind   | 8  | wl     | EU    | + | - | -  | + | 2 |
| Tovote, 2014 - mbct       | 0,56  | 0,31 | adults   | 53.10 | Other | - | Gen med | 0,49 | cbt   | Ind   | 8  | wl     | EU    | + | - | -  | + | 2 |
| Town, 2017                | 1,50  | 0,59 | adults   | 41.60 | Clin  | + | No      | 0,63 | dyn   | Ind   | 16 | cau    | Can   | + | + | +  | + | 4 |
| Tulbure, 2018 - nr-cbt    | 0,84  | 0,37 | adults   | 32.10 | Comm  | + | No      | 0,82 | cbt   | Gsh   | 9  | wl     | EU    | - | - | sr | + | 2 |
| Tulbure, 2018 - r-cbt     | 0,74  | 0,33 | adults   | 32.10 | Comm  | + | No      | 0,82 | cbt   | Gsh   | 9  | wl     | EU    | - | - | sr | + | 2 |
| Turner, 1979 - ba         | 1,45  | 0,52 | adults   | 24.50 | Comm  | - | No      | 0,50 | bat   | Ind   | 5  | othctr | US    | - | - | sr | - | 1 |
| Turner, 2013              | -0,10 | 0,28 | elderly  | 62.00 | Comm  | - | Gen med | 0,26 | cbt   | Grp   | 6  | othctr | Aus   | + | + | sr | - | 3 |
| Tyson, 1987 - ae          | -0,07 | 0,55 | adults   | 24.60 | Comm  | - | No      |      | other | Grp   | 4  | othctr | US    | - | - | sr | - | 1 |
| Tyson, 1987 - in          | -0,19 | 0,55 | adults   | 24.60 | Comm  | - | No      |      | other | Grp   | 4  | othctr | US    | - | - | sr | - | 1 |
| Tyson, 1987 - tu          | -0,17 | 0,55 | adults   | 24.60 | Comm  | - | No      |      | other | Grp   | 4  | othctr | US    | - | - | sr | - | 1 |
| Unlu, 2013                | 0,90  | 0,33 | adults   | 35.20 | Comm  | - | Other   | 0,61 | pst   | Gsh   | 5  | wl     | EU    | + | - | sr | + | 3 |
| Van Bastelaar, 2011       | 0,49  | 0,16 | adults   | 50.00 | Comm  | - | Gen med | 0,61 | cbt   | Gsh   | 8  | wl     | EU    | + | + | sr | + | 4 |
| Van der Zanden, 2013      | 0,84  | 0,13 | Young ad | 20.90 | Comm  | - | No      | 0,84 | cbt   | Grp   | 6  | wl     | EU    | + | + | sr | + | 4 |
| Van Schaik, 2006          | 0,07  | 0,17 | elderly  | 67.90 | Clin  | + | No      | 0,69 | ipt   | Ind   | 8  | cau    | EU    | + | - | -  | + | 2 |
| Vazquez, 2013             | 1,54  | 0,17 | adults   | 53.90 | Other | - | Other   | 1,00 | pst   | Grp   | 5  | cau    | EU    | - | + | sr | + | 3 |
| Vazquez, 2017 - bat       | 2,09  | 0,45 | elderly  | 58.40 | Other | - | Other   | 0,93 | cbt   | Other | 5  | cau    | EU    | + | + | sr | + | 4 |
| Vazquez, 2017 - cbt       | 2,20  | 0,47 | elderly  | 58.40 | Other | - | Other   | 0,93 | bat   | Other | 4  | cau    | EU    | + | + | sr | + | 4 |
| Verduyn, 2003 - cbt       | 0,20  | 0,42 | adults   | 29.80 | Other | - | Other   | 1,00 | cbt   | Grp   | 16 | cau    | UK    | - | + | +  | - | 2 |
| Verduyn, 2003 - sup       | 0,14  | 0,43 | adults   | 29.80 | Other | - | Other   | 1,00 | sup   | Grp   | 16 | cau    | UK    | - | + | +  | - | 2 |
| Vernmark, 2010 - email    | 0,91  | 0,33 | adults   | 36.80 | Comm  | + | No      | 0,68 | cbt   | Gsh   | 6  | wl     | EU    | + | + | sr | + | 4 |
| Vernmark, 2010 - selfh    | 0,46  | 0,32 | adults   | 36.80 | Comm  | + | No      | 0,68 | cbt   | Gsh   | 8  | wl     | EU    | + | + | sr | + | 4 |
| Vitriol, 2009             | 0,57  | 0,22 | adults   | 38.90 | Clin  | + | Other   | 1,00 | dyn   | Ind   | 12 | cau    | Other | - | - | +  | + | 2 |
| Vostanis, 1996a           | 0,29  | 0,27 | children | 12.70 | Clin  | + | No      | 0,56 | cbt   | Ind   | 9  | othctr | UK    | - | - | sr | - | 1 |
| Warmerdam,2008 - cbt      | 0,53  | 0,19 | adults   | 45.00 | Comm  | - | No      | 0,71 | cbt   | Gsh   | 8  | wl     | EU    | + | + | sr | + | 4 |
| Warmerdam,2008 - pst      | 0,42  | 0,19 | adults   | 45.00 | Comm  | - | No      | 0,71 | pst   | Gsh   | 5  | wl     | EU    | + | + | sr | + | 4 |
| Watkins, 2012             | 0,72  | 0,24 | adults   | 46.30 | Clin  | + | No      | 0,64 | other | Other | 7  | cau    | UK    | + | + | +  | + | 4 |
| Watt, 2000 - instr        | 1,55  | 0,61 | elderly  | 66.80 | Comm  | - | No      | 0,54 | lrt   | Grp   | 6  | othctr | Can   | - | - | +  | - | 1 |
| Watt, 2000 - integr       | 1,90  | 0,66 | elderly  | 66.80 | Comm  | - | No      | 0,54 | lrt   | Grp   | 6  | othctr | Can   | - | - | +  | - | 1 |
| Weissman, 1979            | 0,88  | 0,42 | adults   |       | Clin  | + | No      |      | ipt   | Ind   | 16 | othctr | US    | - | - | sr | - | 1 |
| Weisz, 1997               | 0,34  | 0,30 | children | 9.60  | Other | - | No      | 0,46 | cbt   | Grp   | 8  | cau    | US    | - | - | +  | - | 1 |
| Weisz, 2009               | 0,11  | 0,30 | children | 11.80 | Clin  | + | No      | 0,56 | cbt   | Ind   | 15 | cau    | US    | - | - | +  | + | 2 |
| Wickberg, 1996            | 1,33  | 0,47 | adults   | 28.40 | Other | + | PPD     | 1,00 | sup   | Ind   | 6  | cau    | EU    | - | - | +  | - | 1 |
| Wiersma, 2014             | 0,55  | 0,20 | adults   | 41.60 | Clin  | + | No      | 0,60 | other | Ind   | 24 | cau    | EU    | + | + | sr | + | 4 |
| Wiklund, 2010             | 0,82  | 0,29 | adults   |       | Other | - | PPD     | 1,00 | cbt   | Ind   | 21 | cau    | EU    | - | - | sr | - | 1 |
| Williams, 2000            | 0,07  | 0,14 | elderly  | 71.00 | Comm  | + | No      | 0,41 | pst   | Ind   | 6  | othctr | US    | + | + | +  | + | 4 |
| Williams, 2013 I          | 0,23  | 0,12 | adults   | 41.80 | Comm  | + | No      | 0,68 | cbt   | Gsh   | 2  | cau    | Aus   | - | + | sr | + | 3 |
| Williams, 2013 II cbm     | 0,95  | 0,32 | adults   | 44.80 | Clin  | - | No      | 0,76 | cbt   | Gsh   | 13 | wl     | UK    | + | + | sr | + | 4 |
| Williams, 2018            | 0,66  | 0,20 | adults   | 46.60 | Comm  | - | No      | 0,68 | cbt   | Grp   | 8  | wl     | UK    | + | + | sr | + | 4 |
| Wilson, 1983 - beh        | 2,29  | 0,70 | adults   | 39.50 | Comm  | - | No      | 0,80 | bat   | Ind   | 8  | wl     | Aus   | - | - | -  | - | 0 |
| Wilson, 1983 - cogn       | 1,68  | 0,62 | adults   | 39.50 | Comm  | - | No      | 0,80 | cbt   | Ind   | 8  | wl     | Aus   | - | - | -  | - | 0 |

|                         |       |      |          |       |       |   |    |      |       |       |    |        |        |   |   |    |   |   |
|-------------------------|-------|------|----------|-------|-------|---|----|------|-------|-------|----|--------|--------|---|---|----|---|---|
| Wollersheim, 1991 - cop | -0,09 | 0,62 | adults   | 39.40 | Comm  | + | No | 0,72 | cbt   | Grp   | 10 | wl     | US     | - | - | sr | - | 1 |
| Wollersheim, 1991 - gsh | 0,31  | 0,62 | adults   | 39.40 | Comm  | + | No | 0,72 | sup   | Grp   | 10 | wl     | US     | - | - | sr | - | 1 |
| Wollersheim, 1991 - sup | 0,08  | 0,62 | adults   | 39.40 | Comm  | + | No | 0,72 | cbt   | Gsh   | 10 | wl     | US     | - | - | sr | - | 1 |
| Wong I, 2008            | 0,74  | 0,11 | adults   | 42.70 | Comm  | - | No | 0,78 | cbt   | Grp   | 10 | wl     | East A | - | + | sr | + | 3 |
| Wong II, 2008           | 0,76  | 0,22 | adults   | 37.40 | Comm  | + | No | 0,78 | cbt   | Grp   | 10 | wl     | East A | - | + | sr | - | 2 |
| Wong, 2018              | 0,19  | 0,13 | adults   | 54.00 | Clin  | - | No | 0,93 | 3rd   | Grp   | 8  | cau    | East A | + | + | sr | + | 4 |
| Wright, 2005 - cbt      | 1,06  | 0,45 | adults   | 40.20 | Comm  | + | No | 0,76 | cbt   | Ind   | 9  | wl     | US     | - | - | +  | + | 2 |
| Wright, 2005 - ccbt     | 1,03  | 0,45 | adults   | 40.20 | Comm  | + | No | 0,76 | cbt   | Gsh   | 9  | wl     | US     | - | - | +  | + | 2 |
| Wuthrich, 2013          | 0,74  | 0,26 | elderly  | 67.40 | Comm  | + | No | 0,65 | cbt   | Grp   | 9  | wl     | Aus    | + | - | +  | + | 3 |
| Wuthrich, 2016          | 0,55  | 0,18 | elderly  | 67.40 | Comm  | + | No | 0,56 | cbt   | Grp   | 11 | othctr | Aus    | + | + | sr | + | 4 |
| Yang, 2018              | 0,80  | 0,25 | Young ad | 18.50 | Other | + | No | 0,60 | other | Grp   | 11 | cau    | East A | + | - | sr | - | 2 |
| Yeung, 2017             | 0,61  | 0,26 | adults   | 33.00 | Clin  | - | No | 0,77 | cbt   | Gsh   | 5  | wl     | East A | + | + | sr | - | 3 |
| Young, 2006             | 1,49  | 0,36 | adol     | 13.40 | Other | - | No | 0,85 | ipt   | Other | 10 | othctr | US     | + | - | sr | + | 3 |
| Young, 2010             | 0,69  | 0,28 | adol     | 14.60 | Other | - | No | 0,60 | ipt   | Other | 10 | othctr | US     | + | - | sr | + | 3 |
| Yu, 2002                | 0,25  | 0,14 | children | 11.80 | Other | - | No | 0,45 | cbt   | Grp   | 10 | cau    | East A | - | - | sr | - | 1 |
| Zemestani, 2016 bat     | 5,78  | 0,95 | adults   | 24.20 | Other | + | No | 0,61 | 3rd   | Grp   | 8  | wl     | Other  | + | - | sr | + | 3 |
| Zemestani, 2016 mct     | 5,22  | 0,88 | adults   | 24.20 | Other | + | No | 0,61 | bat   | Grp   | 8  | wl     | Other  | + | - | sr | + | 3 |
| Zu, 2014                | 0,58  | 0,38 | adults   | 38.50 | Clin  | + | No | 0,51 | cbt   | Ind   | 20 | cau    | East A | - | - | -  | - | 0 |

**Abbreviations:** 3rd: third wave therapy; AC: Allocation concealment; Aus: Australia; BA: Blinded assessment; Bat: behavioral activation therapy; Can: Canada; Cau: usual care; Cbt: cognitive behavior therapy; Clin: recruitment from clinical samples only; Comm: recruitment from the community (at least partly); Ctr: Control group; Dx: Diagnosis; Dyn: psychodynamic therapy; East A: East Asia; EU: Europe; G: Hedges' g; Gen med: patients with comorbid general medical disorders; Grp: group; Gsh: guided self-help; Ind: individual; Ipt: interpersonal psychotherapy; ITT: intention-to-treat; Lrt: life review therapy; N sess: number of sessions; Othctr: other control condition; PPD: perinatal depression; Pr women: proportion women; Pst: problem-solving therapy; Recr: recruitment; RoB: risk of bias total score; Se: standard error; SG: sequence generation; Spec pop: specific population; Sr: self-report; Sup: non-directive supportive therapy; UK: United Kingdom; US: United States; Wl: waiting list; Young ad: young adults.



## Appendix E. References of the included studies

- Aagaard, J., Foldager, L., Makki, A., Hansen, V., & Møller-Nielsen, K. (2017). The efficacy of psychoeducation on recurrent depression: a randomized trial with a 2-year follow-up. *Nord J Psychiatry*, 71(3), 223-229. Retrieved from <http://onlinelibrary.wiley.com/doi/10.1111/nps.12345>
- Abas, M., Nyamayaro, P., Bere, T., Saruchera, E., Mothobi, N., Simms, V., . . . O'Cleirigh, C. (2018). Feasibility and acceptability of a task-shifted intervention to enhance adherence to HIV medication and improve depression in people living with HIV in Zimbabwe, a low income country in sub-Saharan Africa. *AIDS Behav*, 22(1), 86-101. doi:10.1007/s10461-016-1659-4
- Ackerson J, Scogin F, McKendree-Smith N, Lyman RD. Cognitive bibliotherapy for mild and moderate adolescent depressive symptomatology. *J Consult Clin Psychol*. 1998;66:685-690.
- Ahmadpanah, M., Paghale, S. J., Bakhtyari, A., Kaikhavani, S., Aghaei, E., Nazaribadie, M., . . . Brand, S. (2016). Effects of psychotherapy in combination with pharmacotherapy, when compared to pharmacotherapy only on blood pressure, depression, and anxiety in female patients with hypertension. *Journal of Health Psychology*, 21(7), 1216-1227. doi:10.1177/1359105314550350
- Alexopoulos, G., Raue, P., McCulloch, C., Kanellopoulos, D., Seirup, J., Sirey, J., . . . Are-n, P. (2016). Clinical Case Management versus Case Management with Problem-Solving Therapy in Low-Income, Disabled Elders with Major Depression: A Randomized Clinical Trial. *Am J Geriatr Psychiatry*, 24(1), 50-59. Retrieved from <http://onlinelibrary.wiley.com/doi/10.1111/ajgp.12345>
- Allart-Van Dam, E., Hosman, C. M. H., Hoogduin, C. A. L., & Schaap, C. P. D. R. (2003). The coping with depression course: Short-term outcomes and mediating effects of a randomized controlled trial in the treatment of subclinical depression. *Behavior Therapy*, 34(3), 381-396.
- Ammerman, R. T., Putnam, F. W., Altaye, M., Stevens, J., Teeters, A. R., & Van Ginkel, J. B. (2013). A clinical trial of in-home CBT for depressed mothers in home visitation. *Behav Ther*, 44(3), 359-372. doi:10.1016/j.beth.2013.01.002
- Andersson, G., Bergström, J., Hollnandare, F., Carlbring, P., Kaldø, V., & Ekselius, L. (2005). Internet-based self-help for depression: randomised controlled trial. *British Journal of Psychiatry*, 187, 456-461. Retrieved from <http://onlinelibrary.wiley.com/doi/10.1111/bjp.12345>
- Arean, P. A., Perri, M. G., Nezu, A. M., Schein, R. L., Christopher, F., & Joseph, T. X. (1993). Comparative effectiveness of social problem-solving therapy and reminiscence therapy as treatments for depression in older adults. *J Consult Clin Psychol*, 61(6), 1003-1010.
- Arjadi, R., Nauta, M. H., Scholte, W. F., Hollon, S. D., Chowdhary, N., Suryani, A. O., . . . Bockting, C. L. H. (2018). Internet-based behavioural activation with lay counsellor support versus online minimal psychoeducation without support for treatment of depression: a randomised controlled trial in Indonesia. *The Lancet Psychiatry*, 5(9), 707-716. doi:10.1016/S2215-0366(18)30223-2
- Asarnow JR, Scott CV, Mintz J. A combined cognitive-behavioral family education intervention for depression in children: A treatment development study. *Cognit Ther Res*. 2002;26:221-229.

- Ayen, I., & Hautzinger, M. (2004). Cognitive behavior therapy for depression in menopausal women. A controlled, randomized treatment study. *Zeitschrift für Klinische Psychologie und Psychotherapie*, 33(4), 290-299.
- Barber, J. P., Barrett, M. S., Gallop, R., Rynn, M. A., & Rickels, K. (2012). Short-term dynamic psychotherapy versus pharmacotherapy for major depressive disorder: a randomized, placebo-controlled trial. *J Clin Psychiatry*, 73(1), 66-73. doi:10.4088/JCP.11m06831
- Barnhofer, T., Crane, C., Hargus, E., Amarasinghe, M., Winder, R., & Williams, J. M. (2009). Mindfulness-based cognitive therapy as a treatment for chronic depression: A preliminary study. *Behav Res Ther*, 47(5), 366-373. doi:10.1016/j.brat.2009.01.019
- Barrera, M. (1979). An evaluation of a brief group therapy for depression. *Journal of Consulting and Clinical Psychology*, 47(2), 413.
- Barrett, J. E., Williams Jr, J. W., Oxman, T. E., Frank, E., Katon, W., Sullivan, M., . . . Sengupta, A. S. (2001). Treatment of dysthymia and minor depression in primary care: A randomized trial in patients aged 18 to 59 years. *Journal of Family Practice*, 50(5), 405-412.
- Beach, S. R. H., & O'Leary, K. D. (1992). Treating depression in the context of marital discord: Outcome and predictors of response of marital therapy versus cognitive therapy. *Behavior Therapy*, 23(4), 507-528.
- Bedard, M., Felteau, M., Marshall, S., Cullen, N., Gibbons, C., Dubois, S., . . . Moustgaard, A. (2014). Mindfulness-based cognitive therapy reduces symptoms of depression in people with a traumatic brain injury: Results from a randomized controlled trial. *Journal of Head Trauma Rehabilitation*, 29(4), E13-E22.
- Beeber, L. S., Holditch-Davis, D., Ferreira, K., Schwartz, T. A., Lewis, V., Blanchard, H., . . . Goldman, B. D. (2010). Short-term in-home intervention reduces depressive symptoms in Early Head Start Latina mothers of infants and toddlers. *Res Nurs Health*, 33(1), 60-76. doi:10.1002/nur.20363
- Berger, T., Himmerli, K., Gubser, N., Andersson, G., & Caspar, F. (2011). Internet-based treatment of depression: a randomized controlled trial comparing guided with unguided self-help. *Cognitive Behaviour Therapy*, 40(4), 251-266. Retrieved from <http://onlinelibrary.wiley.com/doi/10.1111/j.1469-7610.2011.02481.x>
- Berger, T., Krieger, T., Sude, K., Meyer, B., & Maercker, A. (2017). Evaluating an e-mental health program ("deprexis") as adjunctive treatment tool in psychotherapy for depression: results of a pragmatic randomized controlled trial. *Journal of Affective Disorders*, 227, 455-462. Retrieved from <http://onlinelibrary.wiley.com/doi/10.1111/jad.14322> doi:10.1111/jad.14322
- Beutel, M. E., Weissflog, G., Leuteritz, K., Wiltink, J., Haselbacher, A., Ruckes, C., . . . Braehler, E. (2014). Efficacy of short-term psychodynamic psychotherapy (STPP) with depressed breast cancer patients: Results of a randomized controlled multicenter trial. *Annals of oncology*, 25(2), 378-384. Retrieved from <http://onlinelibrary.wiley.com/doi/10.1093/annonc/mdt482>
- Boele, F. W., Klein, M., Verdonck-de Leeuw, I. M., Cuijpers, P., Heimans, J. J., Snijders, T. J., . . . Reijneveld, J. C. (2018). Internet-based guided self-help for glioma patients with depressive symptoms: a randomized controlled trial. *Journal of neuro-oncology*, 137(1), 191-203. doi:10.1007/s11060-017-2712-5
- Boeschoten, R. E., Dekker, J., Uitdehaag, B. M. J., Beekman, A. T. F., Hoogendoorn, A. W., Collette, E. H., . . . Van Oppen, P. (2017). Internet-based treatment for depression in

- multiple sclerosis: A randomized controlled trial. *Multiple Sclerosis*, 23(8), 1112-1122. doi:10.1177/1352458516671820
- Bohlmeijer, E. T., Fledderus, M., Rokx, T. A., & Pieterse, M. E. (2011). Efficacy of an early intervention based on acceptance and commitment therapy for adults with depressive symptomatology: Evaluation in a randomized controlled trial. *Behav Res Ther*, 49(1), 62-67. doi:10.1016/j.brat.2010.10.003
- Bolton, P., Bass, J., Neugebauer, R., Verdelli, H., Clougherty, K. F., Wickramaratne, P., . . . Weissman, M. (2003). Group interpersonal psychotherapy for depression in rural Uganda: a randomized controlled trial. *Jama*, 289(23), 3117-3124. doi:10.1001/jama.289.23.3117
- Bolton P, Bass J, Betancourt T, et al. Interventions for depression symptoms among adolescent survivors of war and displacement in Northern Uganda: A randomized controlled trial. *JAMA*. 2007;298:519-527.
- Bowman, D., Scogin, F., & Lyrene, B. (1995). The efficacy of self-examination therapy and cognitive bibliotherapy in the treatment of mild to moderate depression. *Psychotherapy Research*, 5(2), 131-140.
- Brown, R. A., & Lewinsohn, P. M. (1984). A psychoeducational approach to the treatment of depression: comparison of group, individual, and minimal contact procedures. *Journal of Consulting and Clinical Psychology*, 52(5), 774.
- Buhrman, M., Syk, M., Burvall, O., Hartig, T., Gordh, T., & Andersson, G. (2015). Individualized guided internet-delivered cognitive-behavior therapy for chronic pain patients with comorbid depression and anxiety: A randomized controlled trial. *Clinical Journal of Pain*, 31(6), 504-516.
- Buntrock, C., Ebert, D., Lehr, D., Riper, H., Smit, F., Cuijpers, P., & Berking, M. (2015). Effectiveness of a Web-Based Cognitive Behavioural Intervention for Subthreshold Depression: Pragmatic Randomised Controlled Trial. *Psychotherapy and psychosomatics*, 84(6), 348-358.
- Burns, A., Banerjee, S., Morris, J., Woodward, Y., Baldwin, R., Proctor, R., . . . Andrew, G. (2007). Treatment and prevention of depression after surgery for hip fracture in older people: randomized, controlled trials. *J Am Geriatr Soc*, 55(1), 75-80.
- Burns, A., O'Mahen, H., Baxter, H., Bennert, K., Wiles, N., Ramchandani, P., . . . Evans, J. (2013). A pilot randomised controlled trial of cognitive behavioural therapy for antenatal depression. *BMC Psychiatry*, 13, 33. doi:10.1186/1471-244x-13-33
- Carlbring, P., Hagglund, M., Luthstrom, A., Dahlin, M., Kadowaki, A., Vernmark, K., & Andersson, G. (2013). Internet-based behavioral activation and acceptance-based treatment for depression: a randomized controlled trial. *J Affect Disord*, 148(2-3), 331-337. doi:10.1016/j.jad.2012.12.020
- Carr, A., Finnegan, L., Griffin, E., Cotter, P., & Hyland, A. (2017). A Randomized Controlled Trial of the Say Yes to Life (SYTL) Positive Psychology Group Psychotherapy Program for Depression: An Interim Report. *Journal of Contemporary Psychotherapy*, 47(3), 153-161. doi:10.1007/s10879-016-9343-6
- Carta, M. G., Petretto, D., Adamo, S., Bhat, K. M., Lecca, M. E., Mura, G., . . . Moro, M. F. (2012). Counseling in primary care improves depression and quality of life. *Clinical Practice and Epidemiology in Mental Health*, 8.
- Casanas, R., Catalan, R., del Val, J. L., Real, J., Valero, S., & Casas, M. (2012). Effectiveness of a psycho-educational group program for major depression in primary care: a randomized controlled trial. *BMC Psychiatry*, 12, 230. doi:10.1186/1471-244x-12-230
- Castonguay, L. G., Schut, A. J., Aikens, D. E., Constantino, M. J., Laurenceau, J.-P., Bologh, L., & Burns, D. D. (2004). Integrative Cognitive Therapy for Depression: A Preliminary

- Investigation. *Journal of Psychotherapy Integration*, 14(1), 4-20. doi:10.1037/1053-0479.14.1.4
- Chan, A. S., Wong, Q. Y., Sze, S. L., Kwong, P. P., Han, Y. M., & Cheung, M. C. (2012). A Chinese Chan-based mind-body intervention for patients with depression. *J Affect Disord*, 142(1-3), 283-289. doi:10.1016/j.jad.2012.05.018
- Chan, M. F., Ng, S. E., Tien, A., Man Ho, R. C., & Thayala, J. (2013). A randomised controlled study to explore the effect of life story review on depression in older Chinese in Singapore. *Health Soc Care Community*, 21(5), 545-553. doi:10.1111/hsc.12043
- Charkhandeh M, Talib MA, Hunt CJ. The clinical effectiveness of cognitive behavior therapy and an alternative medicine approach in reducing symptoms of depression in adolescents. *Psychiatry Res*. 2016;239:325-330.
- Chen, C. H., Tseng, Y. F., Chou, F. H., & Wang, S. Y. (2000). Effects of support group intervention in postnatally distressed women. A controlled study in Taiwan. *J Psychosom Res*, 49(6), 395-399.
- Chesney, M. A., Chambers, D. B., Taylor, J. M., Johnson, L. M., & Folkman, S. (2003). Coping effectiveness training for men living with HIV: results from a randomized clinical trial testing a group-based intervention. *Psychosom Med*, 65(6), 1038-1046.
- Chiang, K. J., Chen, T. H., Hsieh, H. T., Tsai, J. C., Ou, K. L., & Chou, K. R. (2015). One-Year Follow-Up of the Effectiveness of Cognitive Behavioral Group Therapy for Patients' Depression: A Randomized, Single-Blinded, Controlled Study. *Scientific World Journal*, 2015.
- Cho, H. J., Kwon, J. H., & Lee, J. J. (2008). Antenatal cognitive-behavioral therapy for prevention of postpartum depression: a pilot study. *Yonsei Med J*, 49(4), 553-562. doi:10.3349/ymj.2008.49.4.553
- Choi, I., Zou, J., Titov, N., Dear, B. F., Li, S., Johnston, L., . . . Hunt, C. (2012). Culturally attuned Internet treatment for depression amongst Chinese Australians: a randomised controlled trial. *Journal of Affective Disorders*, 136(3), 459-468. Retrieved from <http://onlinelibrary.wiley.com/o/cochrane/clcentral/articles/547/CN-00851547/frame.html>
- Choi, N. G., Marti, C. N., Bruce, M. L., & Hegel, M. T. (2013). Depression in homebound older adults: problem-solving therapy and personal and social resourcefulness. *Behav Ther*, 44(3), 489-500. doi:10.1016/j.beth.2013.04.002
- Chowdhary, N., Anand, A., Dimidjian, S., Shinde, S., Weobong, B., Balaji, M., . . . Patel, V. (2016). The healthy activity program lay counsellor delivered treatment for severe depression in India: Systematic development and randomised evaluation. *British Journal of Psychiatry*, 208(4), 381-388.
- Choy, J., & Lou, V. (2016). Effectiveness of the Modified Instrumental Reminiscence Intervention on Psychological Well-Being Among Community-Dwelling Chinese Older Adults: A Randomized Controlled Trial. *Am J Geriatr Psychiatry*, 24(1), 60-69. Retrieved from <http://onlinelibrary.wiley.com/o/cochrane/clcentral/articles/926/CN-01140926/frame.html>
- Clark, R., Tluczek, A., & Brown, R. (2008). A mother–infant therapy group model for postpartum depression. *Infant Mental Health Journal*, 29(5), 514-536.
- Clark, R., Tluczek, A., & Wenzel, A. (2003). Psychotherapy for Postpartum Depression: A Preliminary Report. *American Journal of Orthopsychiatry*, 73(4), 441-454. doi:10.1037/0002-9432.73.4.441
- Clarke GN, Hawkins W, Murphy M, Sheeber LB, Lewinsohn PM, Seeley JR. Targeted prevention of unipolar depressive disorder in an at-risk sample of high school adolescents: A randomized trial of group cognitive intervention. *J Am Acad Child Adolesc Psychiatry*. 1995;34:312-321.

- Clarke GN, Hornbrook M, Lynch F, et al. A randomized trial of a group cognitive intervention for preventing depression in adolescent offspring of depressed parents. *Arch Gen Psychiatry*. 2001;58:1127-1134.
- Clarke GN, Hornbrook M, Lynch F, et al. Group cognitive-behavioral treatment for depressed adolescent offspring of depressed parents in a health maintenance organization. *J Am Acad Child Adolesc Psychiatry*. 2002;41:305-313.
- Clarke GN, Rohde P, Lewinsohn PM, Hops H, Seeley JR. Cognitive-behavioral treatment of adolescent depression: Efficacy of acute group treatment and booster sessions. *J Am Acad Child Adolesc Psychiatry*. 1999;38:272-279.
- Cohen, S., O'Leary, K. D., & Foran, H. (2010). A randomized clinical trial of a brief, problem-focused couple therapy for depression. *Behavior Therapy*, 41(4), 433-446. Retrieved from <http://onlinelibrary.wiley.com/o/cochrane/clcentral/articles/274/CN-00772274/frame.html>
- Cooper, P. J., Murray, L., Wilson, A., & Romaniuk, H. (2003). Controlled trial of the short- and long-term effect of psychological treatment of post-partum depression. I. Impact on maternal mood. *Br J Psychiatry*, 182, 412-419.
- Cramer, H., Salisbury, C., Conrad, J., Eldred, J., & Araya, R. (2011). Group cognitive behavioural therapy for women with depression: pilot and feasibility study for a randomised controlled trial using mixed methods. *BMC Psychiatry*, 11, 82. doi:10.1186/1471-244x-11-82
- De Cuyper S, Timbremont B, Braet C, De Backer V, Wullaert T. Treating depressive symptoms in schoolchildren: A pilot study. *Eur Child Adolesc Psychiatry*. 2004;13:105-114.
- De Jong, M., Peeters, F., Gard, T., Ashih, H., Doorley, J., Walker, R., . . . et al. (2018). A randomized controlled pilot study on mindfulness-based cognitive therapy for unipolar depression in patients with chronic pain. *Journal of clinical psychiatry*, 79(1), 26-34. doi:10.4088/JCP.15m10160
- Dekker, R. L., Moser, D. K., Peden, A. R., & Lennie, T. A. (2012). Cognitive therapy improves three-month outcomes in hospitalized patients with heart failure. *J Card Fail*, 18(1), 10-20. doi:10.1016/j.cardfail.2011.09.008
- DeRubeis, R. J., Hollon, S. D., Amsterdam, J. D., Shelton, R. C., Young, P. R., Salomon, R. M., . . . Gallop, R. (2005). Cognitive therapy vs medications in the treatment of moderate to severe depression. *Arch Gen Psychiatry*, 62(4), 409-416. doi:10.1001/archpsyc.62.4.409
- Desautels, C., Savard, J., Ivers, H., Savard, M. H., & Caplette-Gingras, A. (2017). Treatment of Depressive Symptoms in Patients with Breast Cancer: A Randomized Controlled Trial Comparing Cognitive Therapy and Bright Light Therapy. *Health Psychology*. doi:10.1037/hea0000539
- Diamond GS, Reis BF, Diamond GM, Siqueland L, Isaacs L. Attachment-based family therapy for depressed adolescents: A treatment development study. *J Am Acad Child Adolesc Psychiatry*. 2002;41:1190-1196.
- Dimidjian, S., Goodman, S., Sherwood, N., Simon, G., Ludman, E., Gallop, R., . . . Beck, A. (2017). A Pragmatic Randomized Clinical Trial of Behavioral Activation for Depressed Pregnant Women. *Journal of Consulting and Clinical Psychology*, 85(1), 26-36. Retrieved from <http://onlinelibrary.wiley.com/o/cochrane/clcentral/articles/565/CN-01300565/frame.html> doi:10.1037/ccp0000151
- Dimidjian, S., Hollon, S. D., Dobson, K. S., Schmaling, K. B., Kohlenberg, R. J., Addis, M. E., . . . Jacobson, N. S. (2006). Randomized trial of behavioral activation, cognitive therapy, and antidepressant medication in the acute treatment of adults with major depression. *J Consult Clin Psychol*, 74(4), 658-670. doi:10.1037/0022-006x.74.4.658

- Dindo, L., Recober, A., Marchman, J. N., Turvey, C., & O'Hara, M. W. (2012). One-day behavioral treatment for patients with comorbid depression and migraine: A pilot study. *Behaviour Research and Therapy*, 50(9), 537-543. doi:10.1016/j.brat.2012.05.007
- Dobkin, R. D., Menza, M., Allen, L. A., Gara, M. A., Mark, M. H., Tiu, J., . . . Friedman, J. (2011). Cognitive-behavioral therapy for depression in Parkinson's disease: a randomized, controlled trial. *Am J Psychiatry*, 168(10), 1066-1074. doi:10.1176/appi.ajp.2011.10111669
- Doering, L. V., Chen, B., Cross Bodan, R., Magsarili, M. C., Nyamathi, A., & Irwin, M. R. (2013). Early cognitive behavioral therapy for depression after cardiac surgery. *J Cardiovasc Nurs*, 28(4), 370-379. doi:10.1097/JCN.0b013e31824d967d
- Dowrick, C., Dunn, G., Ayuso-Mateos, J. L., Dalgard, O. S., Page, H., & Lehtinen, V. (2000). Problem solving treatment and group psychoeducation for depression: multicentre randomised controlled trial Outcomes of Depression International Network [ODIN] Group. *Bmj*, 321(7274), 1450-1454. Retrieved from <http://onlinelibrary.wiley.com/o/cochrane/clcentral/articles/836/CN-00623836/frame.html>
- Duarte, P. S., Miyazaki, M. C., Blay, S. L., & Sesso, R. (2009). Cognitive-behavioral group therapy is an effective treatment for major depression in hemodialysis patients. *Kidney Int*, 76(4), 414-421. doi:10.1038/ki.2009.156
- Dwight-Johnson, M., Aisenberg, E., Golinelli, D., Hong, S., O'Brien, M., & Ludman, E. (2011). Telephone-based cognitive-behavioral therapy for Latino patients living in rural areas: a randomized pilot study. *Psychiatr Serv*, 62(8), 936-942. doi:10.1176/appi.ps.62.8.936
- Ebert, D. D., Buntrock, C., Lehr, D., Smit, F., Riper, H., Baumeister, H., . . . Berking, M. (2017). Effectiveness of Web- and Mobile-Based Treatment of Subthreshold Depression With Adherence-Focused Guidance: A Single-Blind Randomized Controlled Trial. *Behav. Ther.* doi:10.1016/j.beth.2017.05.004
- Ebert, D. D., Lehr, D., Baumeister, H., Boss, L., Riper, H., Cuijpers, P., . . . Berking, M. (2014). GET.ON Mood Enhancer: efficacy of Internet-based guided self-help compared to psychoeducation for depression: an investigator-blinded randomised controlled trial. *Trials*, 15, 39. doi:10.1186/1745-6215-15-39
- Ekers, D., Richards, D., McMillan, D., Bland, J. M., & Gilbody, S. (2011). Behavioural activation delivered by the non-specialist: phase II randomised controlled trial. *Br J Psychiatry*, 198(1), 66-72. doi:10.1192/bjp.bp.110.079111
- Ekkers, W., Korrelboom, K., Huijbrechts, I., Smits, N., Cuijpers, P., & Gaag, M. (2011). Competitive Memory Training for treating depression and rumination in depressed older adults: a randomized controlled trial. *Behaviour Research and Therapy*, 49(10), 588-596. Retrieved from <http://onlinelibrary.wiley.com/o/cochrane/clcentral/articles/518/CN-00810518/frame.html>
- Elkin, I., Shea, M. T., Watkins, J. T., Imber, S. D., Sotsky, S. M., Collins, J. F., . . . et al. (1989). National Institute of Mental Health Treatment of Depression Collaborative Research Program. General effectiveness of treatments. *Arch Gen Psychiatry*, 46(11), 971-982; discussion 983.
- Embling, S. (2002). The effectiveness of cognitive behavioural therapy in depression. *Nurs Stand*, 17(14-15), 33-41. doi:10.7748/ns2002.12.17.14.33.c3318
- Eseadi, C., Obidoa, M. A., Ogbuabor, S. E., & Ikechukwu-Ilomuanya, A. B. (2018). Effects of Group-Focused Cognitive-Behavioral Coaching Program on Depressive Symptoms in a Sample of Inmates in a Nigerian Prison. *International journal of offender therapy and comparative criminology*, 62(6), 1589-1602. doi:10.1177/0306624X16687046

- Euteneuer, F., Dannehl, K., Del Rey, A., Engler, H., Schedlowski, M., & Rief, W. (2017). Immunological effects of behavioral activation with exercise in major depression: An exploratory randomized controlled trial. *Translational Psychiatry*, 7(5). doi:10.1038/tp.2017.76
- Evans, R. L., & Connis, R. T. (1995). Comparison of brief group therapies for depressed cancer patients receiving radiation treatment. *Public Health Rep*, 110(3), 306-311.
- Fann, J. R., Bombardier, C. H., Vannoy, S., Dyer, J., Ludman, E., Dikmen, S., . . . Temkin, N. (2015). Telephone and in-person cognitive behavioral therapy for major depression after traumatic brain injury: a randomized controlled trial. *J Neurotrauma*, 32(1), 45-57. doi:10.1089/neu.2014.3423
- Faramarzi, M., Alipor, A., Esmaelzadeh, S., Kheirkhah, F., Poladi, K., & Pash, H. (2008). Treatment of depression and anxiety in infertile women: cognitive behavioral therapy versus fluoxetine. *J Affect Disord*, 108(1-2), 159-164. doi:10.1016/j.jad.2007.09.002
- Fledderus, M., Bohlmeijer, E. T., Pieterse, M. E., & Schreurs, K. M. (2012). Acceptance and commitment therapy as guided self-help for psychological distress and positive mental health: a randomized controlled trial. *Psychol Med*, 42(3), 485-495. doi:10.1017/s0033291711001206
- Floyd, M., Scogin, F., McKendree-Smith, N. L., Floyd, D. L., & Rokke, P. D. (2004). Cognitive therapy for depression: a comparison of individual psychotherapy and bibliotherapy for depressed older adults. *Behav Modif*, 28(2), 297-318. doi:10.1177/0145445503259284
- Folke, F., Parling, T., & Melin, L. (2012). Acceptance and commitment therapy for depression: A preliminary randomized clinical trial for unemployed on long-term sick leave. *Cognitive and Behavioral Practice*, 19(4), 583-594.
- Fonagy, P., Rost, F., Carlyle, J. A., McPherson, S., Thomas, R., Pasco Fearon, R. M., . . . Taylor, D. (2015). Pragmatic randomized controlled trial of long-term psychoanalytic psychotherapy for treatment-resistant depression: The Tavistock Adult Depression Study (TADS). *World Psychiatry*, 14(3), 312-321.
- Forand, N. R., Barnett, J. G., Strunk, D. R., Hindiyeh, M. U., Feinberg, J. E., & Keefe, J. R. (2018). Efficacy of Guided iCBT for Depression and Mediation of Change by Cognitive Skill Acquisition. *Behavior Therapy*, 49(2), 295-307. doi:10.1016/j.beth.2017.04.004
- Forsell, E., Bendix, M., Holländare, F., Szymanska von Schultz, B., Nasiell, J., Blomdahl-Wetterholm, M., . . . Kaldo, V. (2017). Internet delivered cognitive behavior therapy for antenatal depression: A randomised controlled trial. *Journal of Affective Disorders*, 221, 56-64. doi:10.1016/j.jad.2017.06.013
- Freedland, K. E., Carney, R. M., Rich, M. W., Steinmeyer, B. C., & Rubin, E. H. (2015). Cognitive behavior therapy for depression and self-care in heart failure patients a randomized clinical trial. *JAMA Internal Medicine*, 175(11), 1773-1782.
- Freedland, K. E., Skala, J. A., Carney, R. M., Rubin, E. H., Lustman, P. J., D-vila-Rom-n, V. G., . . . Hogue, C. W. (2009). Treatment of depression after coronary artery bypass surgery: a randomized controlled trial. *Archives of general psychiatry*, 66(4), 387-396. Retrieved from <http://onlinelibrary.wiley.com/o/cochrane/clcentral/articles/578/CN-00687578/frame.html>
- Fry, P. (1983). Structured and unstructured reminiscence training and depression among the elderly. *Clinical Gerontologist*, 1(3), 15-37.
- Furukawa, T. A., Horikoshi, M., Kawakami, N., Kadota, M., Sasaki, M., Sekiya, Y., . . . Grothaus, L. C. (2012). Telephone cognitive-behavioral therapy for subthreshold depression and presenteeism in workplace: a randomized controlled trial. *PLoS ONE*, 7(4), e35330. doi:10.1371/journal.pone.0035330

- García-Peña, C., Vázquez-Estupiñan, F., Avalos-Pérez, F., Jiménez, L. V. R., Sánchez-García, S., & Juárez-Cedillo, T. (2015). Clinical effectiveness of group cognitive-behavioural therapy for depressed older people in primary care: A randomised controlled trial. *Salud Mental*, 38(1), 33-39.
- Gawrysiak, M., Nicholas, C., & Hopko, D. R. (2009). Behavioral activation for moderately depressed university students: Randomized controlled trial. *Journal of counseling psychology*, 56(3), 468-475. Retrieved from <http://onlinelibrary.wiley.com/o/cochrane/clcentral/articles/589/CN-00738589/frame.html>
- Gellis, Z. D., & Bruce, M. L. (2010). Problem solving therapy for subthreshold depression in home healthcare patients with cardiovascular disease. *Am J Geriatr Psychiatry*, 18(6), 464-474.
- Gellis, Z. D., McGinty, J., Tierney, L., Jordan, C., Burton, J., & Misener, E. (2008). Randomized controlled trial of problem-solving therapy for minor depression in home care. [References]. *Research on social work practice*, 18(6), 596-606. Retrieved from <http://onlinelibrary.wiley.com/o/cochrane/clcentral/articles/563/CN-00738563/frame.html>
- Geraedts, A. S., Kleiboer, A. M., Wiezer, N. M., van Mechelen, W., & Cuijpers, P. (2014). Short-term effects of a web-based guided self-help intervention for employees with depressive symptoms: randomized controlled trial. *J Med Internet Res*, 16(5), e121. doi:10.2196/jmir.3185
- Gibbons, M. B., Thompson, S. M., Scott, K., Schauble, L. A., Mooney, T., Thompson, D., . . . Crits-Christoph, P. (2012). Supportive-expressive dynamic psychotherapy in the community mental health system: a pilot effectiveness trial for the treatment of depression. *Psychotherapy (Chic)*, 49(3), 303-316. doi:10.1037/a0027694
- Gillham JE, Hamilton J, Freres DR, Patton K, Gallop R. Preventing depression among early adolescents in the primary care setting: A randomized controlled study of the Penn Resiliency Program. *J Abnorm Child Psychol*. 2006;34:203-219.
- Gitlin, L. N., Harris, L. F., McCoy, M. C., Chernett, N. L., Pizzi, L. T., Jutkowitz, E., . . . Hauck, W. W. (2013). A home-based intervention to reduce depressive symptoms and improve quality of life in older African Americans: a randomized trial. *Ann Intern Med*, 159(4), 243-252.
- Goodman, J. H., Prager, J., Goldstein, R., & Freeman, M. (2015). Perinatal Dyadic Psychotherapy for postpartum depression: a randomized controlled pilot trial. *Arch Womens Ment Health*, 18(3), 493-506. doi:10.1007/s00737-014-0483-y
- Greenberg, J., Datta, T., Shapero, B. G., Sevinc, G., Mischoulon, D., & Lazar, S. W. (2018). Compassionate hearts protect against wandering minds: Self-compassion moderates the effect of mind-wandering on depression. *Spirituality in Clinical Practice*, 5(3), 155-169. doi:10.1037/scp0000168
- Grote, N. K., Swartz, H. A., Geibel, S. L., Zuckoff, A., Houck, P. R., & Frank, E. (2009). A randomized controlled trial of culturally relevant, brief interpersonal psychotherapy for perinatal depression. *Psychiatr Serv*, 60(3), 313-321. doi:10.1176/appi.ps.60.3.313
- Hagen, R., Hjemdal, O., Solem, S., Kennair, L. E. O., Nordahl, H. M., Fisher, P., & Wells, A. (2017). Metacognitive therapy for depression in adults: A waiting list randomized controlled trial with six months follow-up. *Frontiers in Psychology*, 8.
- Hallford, D., & Mellor, D. (2016). Autobiographical memory-based intervention for depressive symptoms in young adults: A randomized controlled trial of cognitive-remembrance therapy. *Psychotherapy and psychosomatics*, 85(4), 246-249. Retrieved from <http://onlinelibrary.wiley.com/o/cochrane/clcentral/articles/662/CN-01165662/frame.html>



- Hallgren, M., Kraepelien, M., Öjehagen, A., Lindefors, N., Zeebari, Z., Kaldo, V., & Forsell, Y. (2015). Physical exercise and internet-based cognitive-behavioural therapy in the treatment of depression: Randomised controlled trial. *British Journal of Psychiatry*, 207(3), 227-234.
- Hamamci, Z. (2006). Integrating psychodrama and cognitive behavioral therapy to treat moderate depression. *Arts in Psychotherapy*, 33(3), 199-207.
- Hamdan-Mansour, A. M., Puskar, K., & Bandak, A. G. (2009). Effectiveness of cognitive-behavioral therapy on depressive symptomatology, stress and coping strategies among Jordanian university students. *Issues Ment Health Nurs*, 30(3), 188-196. doi:10.1080/01612840802694577
- Haringsma, R., Engels, G., Cuijpers, P., & Spinhoven, P. (2006). Effectiveness of the Coping With Depression (CWD) course for older adults provided by the community-based mental health care system in the Netherlands: a randomized controlled field trial. *International Psychogeriatrics*, 18(02), 307-325.
- Harley, R., Sprich, S., Safren, S., Jacobo, M., & Fava, M. (2008). Adaptation of dialectical behavior therapy skills training group for treatment-resistant depression. *J Nerv Ment Dis*, 196(2), 136-143. doi:10.1097/NMD.0b013e318162aa3f
- Hassiotis, A., Serfaty, M., Azam, K., Strydom, A., Blizard, R., Romeo, R., . . . King, M. (2013). Manualised Individual Cognitive Behavioural Therapy for mood disorders in people with mild to moderate intellectual disability: A feasibility randomised controlled trial. *Journal of Affective Disorders*, 151(1), 186-195.
- Hautzinger, M., & Welz, S. (2004). Kognitive Verhaltenstherapie bei Depressionen im Alter: Ergebnisse einer kontrollierten Vergleichsstudie unter ambulanten Bedingungen an Depressionen mittleren Schweregrads. = Cognitive behavioral therapy for depressed older outpatients--A controlled, randomized trial. *Zeitschrift für Gerontologie und Geriatrie*, 37(6), 427-435. doi:10.1007/s00391-004-0262-x
- Hayman, P. M., & Cope, C. S. (1980). Effects of assertion training on depression. *J Clin Psychol*, 36(2), 534-543.
- Heckman, T. G., Heckman, B. D., Anderson, T., Lovejoy, T. I., Markowitz, J. C., Shen, Y., & Sutton, M. (2017). Tele-interpersonal psychotherapy acutely reduces depressive symptoms in depressed HIV-infected rural persons: A randomized clinical trial. *Behavioral Medicine*, 43(4), 285-295. doi:10.1080/08964289.2016.1160025
- Heckman, T. G., Sikkema, K. J., Hansen, N., Kochman, A., Heh, V., Neufeld, S., . . . Group, A. R. (2011). A randomized clinical trial of a coping improvement group intervention for HIV-infected older adults. *J Behav Med*, 34(2), 102-111.
- Hegerl, U., Hautzinger, M., Mergl, R., Kohnen, R., Schütze, M., Scheunemann, W., . . . Henkel, V. (2010). Effects of pharmacotherapy and psychotherapy in depressed primary-care patients: a randomized, controlled trial including a patients' choice arm. *International journal of neuropsychopharmacology*, 13(1), 31-44. Retrieved from <http://onlinelibrary.wiley.com/doi/10.1002/1099-1056.20090100728815/frame.html>
- Hermanns, N., Schmitt, A., Gahr, A., Herder, C., Nowotny, B., Roden, M., . . . Kulzer, B. (2015). The effect of a Diabetes-Specific Cognitive Behavioral Treatment Program (DIAMOS) for patients with diabetes and subclinical depression: results of a randomized controlled trial. *Diabetes Care*, 38(4), 551-560. doi:10.2337/dc14-1416
- Herrmann-Lingen, C., Beutel, M. E., Bosbach, A., Deter, H.-C., Fritzsche, K., Hellmich, M., . . . Albus, C. (2016). A stepwise psychotherapy intervention for reducing risk in coronary artery disease (SPIRR-CAD): Results of an observer-blinded, multicenter, randomized trial in depressed patients with coronary artery disease. *Psychosomatic Medicine*, 78(6), 704-715.

- Holden, J. M., Sagovsky, R., & Cox, J. L. (1989). Counselling in a general practice setting: Controlled study of health visitor intervention in treatment of postnatal depression. *British Medical Journal*, 298(6668), 223-226.
- Honey, K. L., Bennett, P., & Morgan, M. (2002). A brief psycho-educational group intervention for postnatal depression. *British Journal of Clinical Psychology*, 41(4), 405-409.
- Horrell, L., Goldsmith, K. A., Tylee, A. T., Schmidt, U. H., Murphy, C. L., Bonin, E.-M., . . . Brown, J. S. L. (2014). One-day cognitive-behavioural therapy self-confidence workshops for people with depression: Randomised controlled trial. *The British Journal of Psychiatry*, 204(3), 222-233. doi:10.1192/bjp.bp.112.121855
- Hou, Y., Hu, P., Zhang, Y., Lu, Q., Wang, D., Yin, L., . . . Zou, X. (2014). Cognitive behavioral therapy in combination with systemic family therapy improves mild to moderate postpartum depression. *Rev Bras Psiquiatr*, 36(1), 47-52. doi:10.1590/1516-4446-2013-1170
- Huang, C.-Y., Lai, H.-L., Chen, C.-I., Lu, Y.-C., Li, S.-C., Wang, L.-W., & Su, Y. (2016). Effects of motivational enhancement therapy plus cognitive behaviour therapy on depressive symptoms and health-related quality of life in adults with type II diabetes mellitus: A randomised controlled trial. *Quality of Life Research: An International Journal of Quality of Life Aspects of Treatment, Care & Rehabilitation*, 25(5), 1275-1283. doi:10.1007/s11136-015-1165-6
- Hummel, J., Weisbrod, C., Boesch, L., Himpler, K., Hauer, K., Hautzinger, M., . . . Kopf, D. (2017). AIDE—Acute Illness and Depression in Elderly Patients. Cognitive Behavioral Group Psychotherapy in Geriatric Patients With Comorbid Depression: A Randomized, Controlled Trial. *Journal of the American Medical Association*, 18(4), 341-349. doi:10.1016/j.jamda.2016.10.009
- Hunter, S. B., Watkins, K. E., Hepner, K. A., Paddock, S. M., Ewing, B. A., Osilla, K. C., & Perry, S. (2012). Treating depression and substance use: a randomized controlled trial. *J Subst Abuse Treat*, 43(2), 137-151. doi:10.1016/j.jsat.2011.12.004
- Husain, N., Zulqernain, F., Carter, L.-A., Chaudhry, I., Fatima, B., Kiran, T., . . . Rahman, A. (2017). Treatment of maternal depression in urban slums of Karachi, Pakistan: a randomized controlled trial (RCT) of an integrated maternal psychological and early child development intervention. *Asian journal of psychiatry*, 29, 63-70. Retrieved from <http://onlinelibrary.wiley.com/o/cochrane/clcentral/articles/264/CN-01374264/frame.html> doi:10.1016/j.ajp.2017.03.010
- Israel P, Diamond GS. Feasibility of attachment based family therapy for depressed clinic-referred Norwegian adolescents. *Clin Child Psychol Psychiatry*. 2013;18:334-350.
- Jamison, C., & Scogin, F. (1995). The outcome of cognitive bibliotherapy with depressed adults. *J Consult Clin Psychol*, 63(4), 644-650.
- Jarrett, R. B., Schaffer, M., McIntire, D., Witt-Browder, A., Kraft, D., & Risser, R. C. (1999). Treatment of atypical depression with cognitive therapy or phenelzine: a double-blind, placebo-controlled trial. *Arch Gen Psychiatry*, 56(5), 431-437.
- Jelinek, L., Hauschildt, M., Wittekind, C., Schneider, B., Kriston, L., & Moritz, S. (2016). Efficacy of metacognitive training for depression: A randomized controlled trial. *Psychotherapy and psychosomatics*, 85(4), 231-234. Retrieved from <http://onlinelibrary.wiley.com/o/cochrane/clcentral/articles/637/CN-01165637/frame.html>
- Jeong Y, Hong S, Lee MS, Park M, Kim Y, Suh C. Dance movement therapy improves emotional responses and modulates neurohormones in adolescents with mild depression. *Int J Neurosci*. 2005;115:1711-1720.

- Jesse, D. E., Gaynes, B. N., Feldhousen, E. B., Newton, E. R., Bunch, S., & Hollon, S. D. (2015). Performance of a Culturally Tailored Cognitive-Behavioral Intervention Integrated in a Public Health Setting to Reduce Risk of Antepartum Depression: A Randomized Controlled Trial. *Journal of Midwifery and Women's Health*, 60(5), 578-592.
- Jiang, L., Wang, Z. Z., Qiu, L. R., Wan, G. B., Lin, Y., & Wei, Z. (2014). Psychological intervention for postpartum depression. *J Huazhong Univ Sci Technolog Med Sci*, 34(3), 437-442. doi:10.1007/s11596-014-1297-x
- Johansson, R., Ekbladh, S., Hebert, A., Lindström, M., Møller, S., Petitt, E., . . . Andersson, G. (2012). Psychodynamic guided self-help for adult depression through the internet: a randomised controlled trial. *PLoS ONE*, 7(5), e38021. Retrieved from <http://onlinelibrary.wiley.com/o/cochrane/clcentral/articles/104/CN-00842104/frame.html>
- Johansson, R., Sjöberg, E., Sjögren, M., Johnsson, E., Carlbring, P., Andersson, T., . . . Andersson, G. (2012). Tailored vs. standardized internet-based cognitive behavior therapy for depression and comorbid symptoms: a randomized controlled trial. *PLoS ONE*, 7(5), e36905. Retrieved from <http://onlinelibrary.wiley.com/o/cochrane/clcentral/articles/787/CN-00852787/frame.html>
- Johnson, J. E., & Zlotnick, C. (2012). Pilot study of treatment for major depression among women prisoners with substance use disorder. *J Psychiatr Res*, 46(9), 1174-1183. doi:10.1016/j.jpsychires.2012.05.007
- Joling, K. J., Hout, H. P., van't Veer-Tazelaar, P. J., Horst, H. E., Cuijpers, P., Ven, P. M., & Marwijk, H. W. (2011). How effective is bibliotherapy for very old adults with subthreshold depression? A randomized controlled trial. *American Journal of Geriatric Psychiatry*, 19(3), 256-265. Retrieved from <http://onlinelibrary.wiley.com/o/cochrane/clcentral/articles/206/CN-00789206/frame.html>
- Kahn JS, Kehle TJ, Jenson WR, Clark E. Comparison of cognitive-behavioral, relaxation, and self-modeling interventions for depression among middle-school students. *School Psych Rev*. 1990;19:196-211.
- Kamga, H., McCusker, J., Yaffe, M., Sewitch, M., Sussman, T., Strumpf, E., . . . Freeman, E. (2017). Self-care tools to treat depressive symptoms in patients with age-related eye disease: a randomized controlled clinical trial. *Clinical & experimental ophthalmology*, 45(4), 371-378. Retrieved from <http://onlinelibrary.wiley.com/o/cochrane/clcentral/articles/617/CN-01413617/frame.html>
- Kanter, J. W., Santiago-Rivera, A. L., Santos, M. M., Nagy, G., López, M., Hurtado, G. D., & West, P. (2015). A Randomized Hybrid Efficacy and Effectiveness Trial of Behavioral Activation for Latinos With Depression. *Behavior Therapy*, 46(2), 177-192.
- Keeley, R. D., Brody, D. S., Engel, M., Burke, B. L., Nordstrom, K., Moralez, E., . . . Emsermann, C. (2016). Motivational interviewing improves depression outcome in primary care: A cluster randomized trial. *Journal of Consulting and Clinical Psychology*, 84(11), 993-1007.
- Kelly, J. A., Murphy, D. A., Bahr, G. R., Kalichman, S. C., Morgan, M. G., Stevenson, L. Y., . . . Bernstein, B. M. (1993). Outcome of cognitive-behavioral and support group brief therapies for depressed, HIV-infected persons. *Am J Psychiatry*, 150(11), 1679-1686.
- Kenter, R. M. F., Cuijpers, P., Beekman, A., & van Straten, A. (2016). Effectiveness of a Web-based guided self-help intervention for outpatients with a depressive disorder:

- Short-term results from a randomized controlled trial. *Journal of medical Internet research*, 18(3).
- Kessler, D., Lewis, G., Kaur, S., Wiles, N., King, M., Weich, S., . . . Peters, T. J. (2009). Therapist-delivered Internet psychotherapy for depression in primary care: a randomised controlled trial. *Lancet*, 374(9690), 628-634. doi:10.1016/s0140-6736(09)61257-5
- Kim, Y. H., Choi, K. S., Han, K., & Kim, H. W. (2018). A psychological intervention programme for patients with breast cancer under chemotherapy and at a high risk of depression: a randomised clinical trial. *Journal of Clinical Nursing*, 27(3-4), 572-581. doi:10.1111/jocn.13910
- King, M., Sibbald, B., Ward, E., Bower, P., Lloyd, M., Gabbay, M., & Byford, S. (2000). Randomised controlled trial of non-directive counselling, cognitive-behaviour therapy and usual general practitioner care in the management of depression as well as mixed anxiety and depression in primary care. *Health Technol Assess*, 4(19), 1-83.
- Kivi, M., Eriksson, M. C. M., Hange, D., Petersson, E.-L., Vernmark, K., Johansson, B., & Björkelund, C. (2014). Internet-based therapy for mild to moderate depression in Swedish primary care: Short term results from the PRIM-NET randomized controlled trial. *Cognitive Behaviour Therapy*, 43(4), 289-298. doi:10.1080/16506073.2014.921834
- Kleiboer, A., Donker, T., Seekles, W., van Straten, A., Riper, H., & Cuijpers, P. (2015). A randomized controlled trial on the role of support in Internet-based problem solving therapy for depression and anxiety. *Behaviour Research and Therapy*, 72, 63-71.
- Korrelboom, K., Maarsingh, M., & Huijbrechts, I. (2012). Competitive memory training (COMET) for treating low self-esteem in patients with depressive disorders: a randomized clinical trial. *Depress Anxiety*, 29(2), 102-110. doi:10.1002/da.20921
- Korte, J., Bohlmeijer, E. T., Cappeliez, P., Smit, F., & Westerhof, G. J. (2012). Life review therapy for older adults with moderate depressive symptomatology: a pragmatic randomized controlled trial. *Psychological Medicine*, 42(6), 1163-1173. Retrieved from <http://onlinelibrary.wiley.com/o/cochrane/clcentral/articles/790/CN-00971790/frame.html>
- Kramer, J., Conijn, B., Oijevaar, P., & Riper, H. (2014). Effectiveness of a web-based solution-focused brief chat treatment for depressed adolescents and young adults: randomized controlled trial. *J Med Internet Res*, 16(5), e141. doi:10.2196/jmir.3261
- Laidlaw, K., Davidson, K., Toner, H., Jackson, G., Clark, S., Law, J., . . . Cross, S. (2008). A randomised controlled trial of cognitive behaviour therapy vs treatment as usual in the treatment of mild to moderate late life depression. *Int J Geriatr Psychiatry*, 23(8), 843-850. doi:10.1002/gps.1993
- Lamers, F., Jonkers, C. C., Bosma, H., Kempen, G. I., Meijer, J. A., Penninx, B. W., . . . van Eijk, J. T. (2010). A minimal psychological intervention in chronically ill elderly patients with depression: a randomized trial. *Psychother Psychosom*, 79(4), 217-226. doi:10.1159/000313690
- Lamers, S. M. A., Bohlmeijer, E. T., Korte, J., & Westerhof, G. J. (2015). The efficacy of life-review as online-guided self-help for adults: A randomized trial. *The Journals of Gerontology: Series B: Psychological Sciences and Social Sciences*, 70B(1), 24-34. doi:10.1093/geronb/gbu030
- Landreville, P., & Bissonnette, L. (1997). Effects of cognitive bibliotherapy for depressed older adults with a disability. *Clinical Gerontologist*, 17(4), 35-55.
- Lappalainen, P., Granlund, A., Siltanen, S., Ahonen, S., Vitikainen, M., Tolvanen, A., & Lappalainen, R. (2014). ACT Internet-based vs face-to-face? A randomized controlled

- trial of two ways to deliver Acceptance and Commitment Therapy for depressive symptoms: An 18-month follow-up. *Behaviour Research and Therapy*, 61, 43-54.
- Larcombe, N. A., & Wilson, P. H. (1984). An evaluation of cognitive-behaviour therapy for depression in patients with multiple sclerosis. *Br J Psychiatry*, 145, 366-371.
- Lemma, A., & Fonagy, P. (2013). Feasibility study of a psychodynamic online group intervention for depression. *Psychoanalytic Psychology*, 30(3), 367-380. doi:10.1037/a0033239
- Lenze, S., & Potts, M. (2017). Brief Interpersonal Psychotherapy for depression during pregnancy in a low-income population: a randomized controlled trial. *Journal of Affective Disorders*, 210, 151-157. Retrieved from <http://onlinelibrary.wiley.com/o/cochrane/clcentral/articles/830/CN-01301830/frame.html> doi:10.1016/j.jad.2016.12.029
- Lerner, D., Adler, D. A., Rogers, W. H., Chang, H., Greenhill, A., Cymerman, E., & Azocar, F. (2015). A randomized clinical trial of a telephone depression intervention to reduce employee presenteeism and absenteeism. *Psychiatric Services*, 66(6), 570-577.
- Leung, S. S., Lee, A. M., Chiang, V. C., Lam, S. K., Kuen, Y. W., & Wong, D. F. (2013). Culturally sensitive, preventive antenatal group cognitive-behavioural therapy for Chinese women with depression. *Int J Nurs Pract*, 19 Suppl 1, 28-37. doi:10.1111/ijn.12021
- Leung, S. S., Lee, A. M., Wong, D. F., Wong, C. M., Leung, K. Y., Chiang, V. C., . . . Chung, K. F. (2016). A brief group intervention using a cognitive-behavioural approach to reduce postnatal depressive symptoms: a randomised controlled trial. *Hong Kong Med J*, 22 Suppl 2, S4-8.
- Lewinsohn PM, Clark GN, Hops H, Andrews J (1990). Cognitive behavioral treatment for depressed adolescents. *Behavior Therapy*, 21, 385-401.
- Lexis, M. A., Jansen, N. W., Huibers, M. J., Amelsvoort, L. G., Berkouwer, A., Tjin, A. T. G., . . . Kant, I. (2011). Prevention of long-term sickness absence and major depression in high-risk employees: a randomised controlled trial. *Occupational and Environmental Medicine*, 68(6), 400-407. Retrieved from <http://onlinelibrary.wiley.com/o/cochrane/clcentral/articles/941/CN-00788941/frame.html>
- Liddle B, Spence SH. Cognitive-behaviour therapy with depressed primary school children: A cautionary note. *Behavioural Psychotherapy*. 1990;18:85-102.
- Linde, J. A., Simon, G. E., Ludman, E. J., Ichikawa, L. E., Operskalski, B. H., Arterburn, D., . . . Jeffery, R. W. (2011). A randomized controlled trial of behavioral weight loss treatment versus combined weight loss/depression treatment among women with comorbid obesity and depression. *Ann Behav Med*, 41(1), 119-130. doi:10.1007/s12160-010-9232-2
- Listug-Lunde L, Vogeltanz-Holm N, Collins J. A cognitive-behavioral treatment for depression in rural American Indian middle school students. *Am Indian Alsk Native Ment Health Res*. 2013;20:16-34.
- Liu, E. T.-H., Chen, W.-L., Li, Y.-H., Wang, C. H., Mok, T. J., & Huang, H. S. (2009). Exploring the efficacy of cognitive bibliotherapy and a potential mechanism of change in the treatment of depressive symptoms among the Chinese: A randomized controlled trial. *Cognitive Therapy and Research*, 33(5), 449-461. doi:10.1007/s10608-008-9228-4
- Lloyd-Williams, M., Shiels, C., Ellis, J., Abba, K., Gaynor, E., Wilson, K., & Dowrick, C. (2018). Pilot randomised controlled trial of focused narrative intervention for moderate to severe depression in palliative care patients: DISCERN trial. *Palliative medicine*, 32(1), 206-215. doi:10.1177/0269216317711322

- Losada, A., Márquez-González, M., Romero-Moreno, R., Mausbach, B. T., López, J., Fernández-Fernández, V., & Nogales-González, C. (2015). Cognitive-behavioral therapy (CBT) versus acceptance and commitment therapy (ACT) for dementia family caregivers with significant depressive symptoms: Results of a randomized clinical trial. *Journal of Consulting and Clinical Psychology*, 83(4), 760-772. doi:10.1037/ccp0000028
- Lovell, K., Bower, P., Richards, D., Barkham, M. i., Sibbald, B., Roberts, C., . . . Hennessy, S. (2008). Developing guided self-help for depression using the medical research council complex interventions framework: A description of the modelling phase and results of an exploratory randomised controlled trial. *BMC Psychiatry*, 8. doi:10.1186/1471-244X-8-91
- Luby J, Lenze S, Tillman R. A novel early intervention for preschool depression: Findings from a pilot randomized controlled trial. *J Child Psychol Psychiatry*. 2012;53:313-322.
- Lundgren, J., Dahlstrom, Ö., Andersson, G., Jaarsma, T., Karner Kohlner, A., & Johansson, P. (2016). The effect of guided web-based cognitive behavioral therapy on patients with depressive symptoms and heart failure-a randomized controlled trial. *European Journal of Heart Failure*, 18, 401.
- Lustman, P. J., Griffith, L. S., Freedland, K. E., Kissel, S. S., & Clouse, R. E. (1998). Cognitive behavior therapy for depression in type 2 diabetes mellitus. A randomized, controlled trial. *Ann Intern Med*, 129(8), 613-621.
- Lynch, D., Tamburrino, M., Nagel, R., & Smith, M. K. (2004). Telephone-based treatment for family practice patients with mild depression. *Psychol Rep*, 94(3 Pt 1), 785-792. doi:10.2466/pr0.94.3.785-792
- Lynch, D. J., Tamburrino, M. B., & Nagel, R. (1997). Telephone counseling for patients with minor depression: preliminary findings in a family practice setting. *J Fam Pract*, 44(3), 293-298.
- MacPherson, H., Richmond, S., Bland, M., Brealey, S., Gabe, R., Hopton, A., . . . Watt, I. (2013). Acupuncture and counselling for depression in primary care: a randomised controlled trial. *PLoS Med*, 10(9), e1001518. doi:10.1371/journal.pmed.1001518
- Maina, G., Forner, F., & Bogetto, F. (2005). Randomized controlled trial comparing brief dynamic and supportive therapy with waiting list condition in minor depressive disorders. *Psychother Psychosom*, 74(1), 43-50. doi:10.1159/000082026
- Malouff, J. M., Lanyon, R. I., & Schutte, N. S. (1988). Effectiveness of a brief group RET treatment for divorce-related dysphoria. *Journal of rational-emotive and cognitive-behavior therapy*, 6(3), 162-171.
- Martin, P. R., Aiello, R., Gilson, K., Meadows, G., Milgrom, J., & Reece, J. (2015). Cognitive behavior therapy for comorbid migraine and/or tension-type headache and major depressive disorder: An exploratory randomized controlled trial. *Behaviour Research and Therapy*, 73, 8-18. Retrieved from <http://onlinelibrary.wiley.com/o/cochrane/clcentral/articles/979/CN-01084979/frame.html>
- Matsuzaka, C., Wainberg, M., Norcini, P. A., Hoffmann, E., Coimbra, B., Braga, R., . . . Mello, M. (2017). Task shifting interpersonal counseling for depression: a pragmatic randomized controlled trial in primary care. *BMC Psychiatry*, 17(1) (no pagination). Retrieved from <http://onlinelibrary.wiley.com/o/cochrane/clcentral/articles/826/CN-01396826/frame.html>
- McCarty CA, Violette HD, Duong MT, Cruz RA, McCauley E. A randomized trial of the positive thoughts and action program for depression among early adolescents. *J Clin Child Adolesc Psychol*. 2013;42:554-563.

- McClay, C.-A., Collins, K., Matthews, L., Haig, C., McConnachie, A., Morrison, J., . . . Williams, C. (2015). A community-based pilot randomised controlled study of life skills classes for individuals with low mood and depression. *BMC Psychiatry*, 15(1), 17. doi:10.1186/s12888-015-0384-2
- McIndoo, C. C., File, A. A., Preddy, T., Clark, C. G., & Hopko, D. R. (2016). Mindfulness-based therapy and behavioral activation: A randomized controlled trial with depressed college students. *Behaviour Research and Therapy*, 77, 118-128.
- McKee, M. D., Zayas, L. H., Fletcher, J., Boyd, R. C., & Nam, S. H. (2006). Results of an Intervention to Reduce Perinatal Depression Among Low-Income Minority Women in Community Primary Care. *Journal of Social Service Research*, 32(4), 63-81. doi:10.1300/J079v32n04\_04
- Michalak, J., Schultze, M., Heidenreich, T., & Schramm, E. (2015). A randomized controlled trial on the efficacy of mindfulness-based cognitive therapy and a group version of cognitive behavioral analysis system of psychotherapy for chronically depressed patients. *Journal of Consulting and Clinical Psychology*, 83(5), 951-963. Retrieved from <http://onlinelibrary.wiley.com/doi/10.1037/ccp0000042>
- Milgrom, J., Danaher, B. G., Gemmill, A. W., Holt, C., Holt, C. J., Seeley, J. R., . . . Ericksen, J. (2016). Internet Cognitive Behavioral Therapy for Women With Postnatal Depression: A Randomized Controlled Trial of MumMoodBooster. *J Med Internet Res*, 18(3), e54. doi:10.2196/jmir.4993
- Milgrom, J., Holt, C., Holt, C. J., Ross, J., Ericksen, J., & Gemmill, A. W. (2015). Feasibility study and pilot randomised trial of an antenatal depression treatment with infant follow-up. *Arch Womens Ment Health*, 18(5), 717-730. doi:10.1007/s00737-015-0512-5
- Milgrom, J., Holt, C. J., Gemmill, A. W., Ericksen, J., Leigh, B., Buist, A., & Schembri, C. (2011). Treating postnatal depressive symptoms in primary care: a randomised controlled trial of GP management, with and without adjunctive counselling. *BMC Psychiatry*, 11, 95. doi:10.1186/1471-244x-11-95
- Milgrom, J., Negri, L. M., Gemmill, A. W., McNeil, M., & Martin, P. R. (2005). A randomized controlled trial of psychological interventions for postnatal depression. *Br J Clin Psychol*, 44(Pt 4), 529-542. doi:10.1348/014466505x34200
- Miller, L., & Weissman, M. (2002). Interpersonal psychotherapy delivered over the telephone to recurrent depressives. A pilot study. *Depress Anxiety*, 16(3), 114-117. doi:10.1002/da.10047
- Miranda, J., Chung, J. Y., Green, B. L., Krupnick, J., Siddique, J., Revicki, D. A., & Belin, T. (2003). Treating depression in predominantly low-income young minority women: a randomized controlled trial. *Jama*, 290(1), 57-65. doi:10.1001/jama.290.1.57
- Mohr, D. C., Carmody, T., Erickson, L., Jin, L., & Leader, J. (2011). Telephone-administered cognitive behavioral therapy for veterans served by community-based outpatient clinics. *J Consult Clin Psychol*, 79(2), 261-265. doi:10.1037/a0022395
- Mohr, D. C., Duffecy, J., Ho, J., Kwasny, M., Cai, X., Burns, M. N., & Begale, M. (2013). A randomized controlled trial evaluating a manualized TeleCoaching protocol for improving adherence to a web-based intervention for the treatment of depression. *PLoS ONE*, 8(8), e70086.
- Mohr, D. C., Likosky, W., Bertagnolli, A., Goodkin, D. E., Van Der Wende, J., Dwyer, P., & Dick, L. P. (2000). Telephone-administered cognitive-behavioral therapy for the treatment of depressive symptoms in multiple sclerosis. *J Consult Clin Psychol*, 68(2), 356-361.

- Moldovan, R., Cobeanu, O., & David, D. (2013). Cognitive bibliotherapy for mild depressive symptomatology: randomized clinical trial of efficacy and mechanisms of change. *Clin Psychol Psychother*, 20(6), 482-493. doi:10.1002/cpp.1814
- Mossey, J. M., Knott, K. A., Higgins, M., & Talerico, K. (1996). Effectiveness of a psychosocial intervention, interpersonal counseling, for subdysthymic depression in medically ill elderly. *J Gerontol A Biol Sci Med Sci*, 51(4), M172-178.
- Mufson L, Weissman MM, Moreau D, Garfinkel R. Efficacy of interpersonal psychotherapy for depressed adolescents. *Arch Gen Psychiatry*. 1999;56:573-579.
- Mufson L, Dorta KP, Wickramaratne P, Nomura Y, Olfson M, Weissman MM (2004). A randomized effectiveness trial of interpersonal psychotherapy for depressed adolescents. *Archives of General Psychiatry*, 61, 577-584.
- Mukhtar, F. (2011). Predictors of Group Cognitive Behaviour Therapy outcomes for the treatment of depression in Malaysia. *Asian journal of psychiatry*, 4(2), 125-128.
- Mulcahy, R., Reay, R. E., Wilkinson, R. B., & Owen, C. (2010). A randomised control trial for the effectiveness of group Interpersonal Psychotherapy for postnatal depression. *Arch Womens Ment Health*, 13(2), 125-139. doi:10.1007/s00737-009-0101-6
- Mynors-Wallis, L., Gath, D., Lloyd-Thomas, A., & Tomlinson, D. (1995). Randomised controlled trial comparing problem solving treatment with amitriptyline and placebo for major depression in primary care. *Bmj*, 310(6977), 441-445.
- Naeem, F., Gul, M., Irfan, M., Munshi, T., Asif, A., Rashid, S., . . . Ayub, M. (2015). Brief Culturally adapted CBT (CaCBT) for depression: A randomized controlled trial from Pakistan. *Journal of Affective Disorders*, 177, 101-107. Retrieved from <http://onlinelibrary.wiley.com/o/cochrane/clcentral/articles/587/CN-01069587/frame.html>
- Naeem, F., Sarhandi, I., Gul, M., Khalid, M., Aslam, M., & Anbrin, A. (2013). A multicentre randomised controlled trial of a carer supervised culturally adapted cbt (cacbt) based self-help for depression in pakistan. *Journal of Affective Disorders*, 156, 224-227. Retrieved from <http://onlinelibrary.wiley.com/o/cochrane/clcentral/articles/623/CN-01038623/frame.html>
- Nakagawa, A., Mitsuda, D., Sado, M., Abe, T., Fujisawa, D., Kikuchi, T., . . . Ono, Y. (2017). Effectiveness of supplementary cognitive-behavioral therapy for pharmacotherapy-resistant depression: A randomized controlled trial. *Journal of clinical psychiatry*, 78(8), 1126-1135. doi:10.4088/JCP.15m10511
- Nakimuli-Mpungu, E., Wamala, K., Okello, J., Alderman, S., Odokonyero, R., Mojtabai, R., . . . Musisi, S. (2015). Group support psychotherapy for depression treatment in people with HIV/AIDS in northern Uganda: a single-centre randomised controlled trial. *Lancet HIV*, 2(5), e190-199. doi:10.1016/s2352-3018(15)00041-7
- Nasrin, F., Rimes, K., Reinecke, A., Rinck, M., & Barnhofer, T. (2017). Effects of Brief Behavioural Activation on Approach and Avoidance Tendencies in Acute Depression: preliminary Findings. *Behavioural and Cognitive Psychotherapy*, 45(1), 58-72. Retrieved from <http://onlinelibrary.wiley.com/o/cochrane/clcentral/articles/905/CN-01331905/frame.html>
- Neugebauer, R., Kline, J., Markowitz, J. C., Bleiberg, K. L., Baxi, L., Rosing, M. A., . . . Keith, J. (2006). Pilot randomized controlled trial of interpersonal counseling for subsyndromal depression following miscarriage. *J Clin Psychiatry*, 67(8), 1299-1304.
- Newby, J. M., Lang, T., Werner-Seidler, A., Holmes, E., & Moulds, M. L. (2014). Alleviating distressing intrusive memories in depression: A comparison between computerised cognitive bias modification and cognitive behavioural education. *Behaviour Research and Therapy*, 56, 60-67.



- Newby, J., Robins, L., Wilhelm, K., Smith, J., Fletcher, T., Gillis, I., . . . Andrews, G. (2017). Web-Based Cognitive Behavior Therapy for Depression in People With Diabetes Mellitus: a Randomized Controlled Trial. *Journal of medical Internet research*, 19(5), e157.
- Nezu, A. M. (1986). Efficacy of a social problem-solving therapy approach for unipolar depression. *J Consult Clin Psychol*, 54(2), 196-202.
- Nezu, A. M., & Perri, M. G. (1989). Social problem-solving therapy for unipolar depression: an initial dismantling investigation. *J Consult Clin Psychol*, 57(3), 408-413.
- Ng, S. E., Tien, A., Thayala, J. N., Ho, R. C., & Chan, M. F. (2013). The effect of life story review on depression of older community-dwelling Chinese adults in Singapore: a preliminary result. *Int J Geriatr Psychiatry*, 28(3), 328-330. doi:10.1002/gps.3851
- Ngai, F. W., Wong, P.-C., Leung, K. Y., Chau, P. H., & Chung, K. F. (2015). The Effect of Telephone-Based Cognitive-Behavioral Therapy on Postnatal Depression: A Randomized Controlled Trial. *Psychotherapy and psychosomatics*, 84(5), 294-303. Retrieved from <http://onlinelibrary.wiley.com/o/cochrane/clcentral/articles/388/CN-01096388/frame.html>
- Nobis, S., Lehr, D., Ebert, D. D., Baumeister, H., Snoek, F., Riper, H., & Berking, M. (2015). Efficacy of a web-based intervention with mobile phone support in treating depressive symptoms in adults with type 1 and type 2 diabetes: a randomized controlled trial. *Diabetes Care*, 38(5), 776-783. doi:10.2337/dc14-1728
- Nollett, C. L., Bray, N., Bunce, C., Casten, R. J., Edwards, R. T., Hegel, M. T., . . . Margrain, T. H. (2016). Depression in visual impairment trial (Depvit): A randomized clinical trial of depression treatments in people with low vision. *Investigative Ophthalmology and Visual Science*, 57(10), 4247-4254.
- Nyström, M., Stenling, A., Sjöström, E., Neely, G., Lindner, P., Hassmén, P., . . . Carlbring, P. (2017). Behavioral activation versus physical activity via the internet: a randomized controlled trial. *Journal of Affective Disorders*, 215, 85-93. Retrieved from <http://onlinelibrary.wiley.com/o/cochrane/clcentral/articles/131/CN-01367131/frame.html> doi:10.1016/j.jad.2017.03.018
- O'Hara, M. W., Stuart, S., Gorman, L. L., & Wenzel, A. (2000). Efficacy of interpersonal psychotherapy for postpartum depression. *Arch Gen Psychiatry*, 57(11), 1039-1045.
- O'Mahen, H., Himle, J. A., Fedock, G., Henshaw, E., & Flynn, H. (2013). A pilot randomized controlled trial of cognitive behavioral therapy for perinatal depression adapted for women with low incomes. *Depress Anxiety*, 30(7), 679-687. doi:10.1002/da.22050
- O'Neil, A., Taylor B Fau - Sanderson, K., Sanderson K Fau - Cyril, S., Cyril S Fau - Chan, B., Chan B Fau - Hawkes, A. L., Hawkes Al Fau - Hare, D. L., . . . Oldenburg, B. (2014). Efficacy and feasibility of a tele-health intervention for acute coronary syndrome patients with depression: results of the "MoodCare" randomized controlled trial. (1532-4796
- Olukolade, O., & Osinowo, H. (2017). Efficacy of Cognitive Rehabilitation Therapy on Poststroke Depression among Survivors of First Stroke Attack in Ibadan, Nigeria. *Behavioural Neurology*, 2017(no pagination). Retrieved from <http://onlinelibrary.wiley.com/o/cochrane/clcentral/articles/043/CN-01394043/frame.html>
- Omid, A., Mohammadkhani, P., Mohammadi, A., & Zargar, F. (2013). Comparing mindfulness based cognitive therapy and traditional cognitive behavior therapy with treatments as usual on reduction of major depressive disorder symptoms. *Iranian Red Crescent Medical Journal*, 15(2), 142-146.
- Onyechi, K. C. N., Eseadi, C., Okere, A. U., Onuigbo, L. N., Umoke, P. C. I., Anyaegbunam, N. J., . . . Ugorji, N. J. (2016). Effects of cognitive behavioral coaching on depressive

- symptoms in a sample of type 2 diabetic inpatients in Nigeria. *Medicine (United States)*, 95(31).
- Pace, T. M., & Dixon, D. N. (1993). Changes in depressive self-schemata and depressive symptoms following cognitive therapy. *Journal of counseling psychology*, 40(3), 288.
- Pagoto, S., Schneider, K. L., Whited, M. C., Oleski, J. L., Merriam, P., Appelhans, B., . . . Crawford, S. (2013). Randomized controlled trial of behavioral treatment for comorbid obesity and depression in women: the Be Active Trial. *Int J Obes (Lond)*, 37(11), 1427-1434. doi:10.1038/ijo.2013.25
- Patel, V., Weobong, B., Weiss, H., Anand, A., Bhat, B., Katti, B., . . . Fairburn, C. (2017). The Healthy Activity Program (HAP), a lay counsellor-delivered brief psychological treatment for severe depression, in primary care in India: a randomised controlled trial. *Lancet (london, england)*, 389(10065), 176-185. Retrieved from <http://onlinelibrary.wiley.com/o/cochrane/clcentral/articles/650/CN-01297650/frame.html> doi:10.1016/S0140-6736(16)31589-6
- Pecheur, D. R., & Edwards, K. J. (1984). A comparison of secular and religious versions of cognitive therapy with depressed Christian college students. *Journal of Psychology and Theology*.
- Peden, A. R., Hall, L. A., Rayens, M. K., & Beebe, L. L. (2000). Reducing negative thinking and depressive symptoms in college women. *J Nurs Scholarsh*, 32(2), 145-151.
- Penckofer, S. M., Ferrans, C., Mumby, P., Byrn, M., Emanuele, M. A., Harrison, P. R., . . . Lustman, P. (2012). A psychoeducational intervention (SWEEP) for depressed women with diabetes. *Ann Behav Med*, 44(2), 192-206. doi:10.1007/s12160-012-9377-2
- Perini, S., Titov, N., & Andrews, G. (2009). Clinician-assisted Internet-based treatment is effective for depression: randomized controlled trial. *Aust N Z J Psychiatry*, 43(6), 571-578. doi:10.1080/00048670902873722
- Petersen, I., Hanass Hancock, J., Bhana, A., & Govender, K. (2014). A group-based counselling intervention for depression comorbid with HIV/AIDS using a task shifting approach in South Africa: a randomized controlled pilot study. *J Affect Disord*, 158, 78-84. doi:10.1016/j.jad.2014.02.013
- Pibernik-Okanovic, M., Begic, D., Ajdukovic, D., Andrijasevic, N., & Metelko, Z. (2009). Psychoeducation versus treatment as usual in diabetic patients with subthreshold depression: preliminary results of a randomized controlled trial. *Trials*, 10, 78. doi:10.1186/1745-6215-10-78
- Pibernik-Okanovic, M., Hermanns, N., Ajdukovic, D., Kos, J., Prasek, M., Sekerija, M., & Lovrencic, M. V. (2015). Does treatment of subsyndromal depression improve depression-related and diabetes-related outcomes? A randomised controlled comparison of psychoeducation, physical exercise and enhanced treatment as usual. *Trials*, 16, 305. doi:10.1186/s13063-015-0833-8
- Poleshuck, E. L., Gamble, S. A., Bellenger, K., Lu, N., Tu, X., Sorensen, S., . . . Talbot, N. L. (2014). Randomized controlled trial of interpersonal psychotherapy versus enhanced treatment as usual for women with co-occurring depression and pelvic pain. *J Psychosom Res*, 77(4), 264-272. doi:10.1016/j.jpsychores.2014.07.016
- Pot, A. M., Bohlmeijer, E. T., Onrust, S., Melenhorst, A.-S., Veerbeek, M., & De Vries, W. (2010). The impact of life review on depression in older adults: A randomized controlled trial. *International Psychogeriatrics*, 22(4), 572-581. doi:10.1017/S104161020999175X
- Pots, W., Fledderus, M., Meulenbeek, P., Klooster, P., Schreurs, K., & Bohlmeijer, E. (2016). Acceptance and commitment therapy as a web-based intervention for depressive symptoms: randomised controlled trial. *Br J Psychiatry*, 208(1), 69-77. Retrieved from

- <http://onlinelibrary.wiley.com/o/cochrane/clcentral/articles/798/CN-01132798/frame.html>
- Pots, W. T. M., Meulenbeek, P. A. M., Veehof, M. M., Klungers, J., & Bohlmeijer, E. T. (2014). The efficacy of mindfulness-based cognitive therapy as a public mental health intervention for adults with mild to moderate depressive symptomatology: A randomized controlled trial. *PLoS ONE*, 9(10).
- Power Michael, J., & Freeman, C. (2012). A randomized controlled trial of IPT versus CBT in primary care: With some cautionary notes about handling missing values in clinical trials. [References]. *Clinical psychology & psychotherapy*, 19(2), 159-169. Retrieved from <http://onlinelibrary.wiley.com/o/cochrane/clcentral/articles/890/CN-00851890/frame.html>
- Prendergast, J., & Austin, M. P. (2001). Early childhood nurse-delivered cognitive behavioural counselling for post-natal depression. *Australasian Psychiatry*, 9(3), 255-259.
- Preschl, B., Maercker, A., Wagner, B., Forstmeier, S., Banos, R. M., Alcaniz, M., . . . Botella, C. (2012). Life-review therapy with computer supplements for depression in the elderly: a randomized controlled trial. *Aging Ment Health*, 16(8), 964-974. doi:10.1080/13607863.2012.702726
- Propst, L. R., Ostrom, R., Watkins, P., Dean, T., & Mashburn, D. (1992). Comparative efficacy of religious and nonreligious cognitive-behavioral therapy for the treatment of clinical depression in religious individuals. *J Consult Clin Psychol*, 60(1), 94-103.
- Puckering, C., McIntosh, E., Hickey, A., & Longford, J. (2010). Mellow Babies: A group intervention for infants and mothers experiencing postnatal depression. *Counselling Psychology Review*, 25(1), 28-38.
- Pugh, N. E., Hadjistavropoulos, H. D., & Dirkse, D. (2016). A Randomised Controlled Trial of Therapist-Assisted, Internet-Delivered Cognitive Behavior Therapy for Women with Maternal Depression. *PLoS ONE*, 11(3), e0149186. doi:10.1371/journal.pone.0149186
- Qiu, J., Chen, W., Gao, X., Xu, Y., Tong, H., Yang, M., . . . Yang, M. (2013). A randomized controlled trial of group cognitive behavioral therapy for Chinese breast cancer patients with major depression. *J Psychosom Obstet Gynaecol*, 34(2), 60-67. doi:10.3109/0167482x.2013.766791
- Rahman, A., Malik, A., Sikander, S., Roberts, C., & Creed, F. (2008). Cognitive behaviour therapy-based intervention by community health workers for mothers with depression and their infants in rural Pakistan: a cluster-randomised controlled trial. *Lancet*, 372(9642), 902-909. doi:10.1016/s0140-6736(08)61400-2
- Ransom, D., Heckman, T. G., Anderson, T., Garske, J., Holroyd, K., & Basta, T. (2008). Telephone-delivered, interpersonal psychotherapy for HIV-infected rural persons with depression: a pilot trial. *Psychiatr Serv*, 59(8), 871-877. doi:10.1176/appi.ps.59.8.871
- Rehm, L. P., Kornblith, S. J., O'Hara, M. W., Lamparski, D. M., Romano, J. M., & Volkin, J. I. (1981). An evaluation of major components in a self-control therapy program for depression. *Behav Modif*, 5(4), 459-489.
- Reynolds WM, Coats KI. A comparison of cognitive-behavioral therapy and relaxation training for the treatment of depression in adolescents. *J Consult Clin Psychol*. 1986;54:653-660.
- Richards, D., Timulak, L., O'Brien, E., Hayes, C., Vigano, N., Sharry, J., & Doherty, G. (2015). A randomized controlled trial of an internet-delivered treatment: Its potential as a low-intensity community intervention for adults with symptoms of depression. *Behaviour Research and Therapy*, 75, 20-31. Retrieved from <http://onlinelibrary.wiley.com/o/cochrane/clcentral/articles/622/CN-01105622/frame.html>

- Richards, S. H., Dickens, C., Anderson, R., Richards, D. A., Taylor, R. S., Ukoumunne, O. C., . . . et al. (2018). Assessing the effectiveness of Enhanced Psychological Care for patients with depressive symptoms attending cardiac rehabilitation compared with treatment as usual (CADENCE): a pilot cluster randomised controlled trial. *Trials*, 19(1). doi:10.1186/s13063-018-2576-9
- Rief, W., Bleichhardt, G., Dannehl, K., Euteneuer, F., & Wambach, K. (2018). Comparing the Efficacy of CBASP with Two Versions of CBT for Depression in a Routine Care Center: a Randomized Clinical Trial. *Psychotherapy and psychosomatics*, (no pagination). doi:10.1159/000487893
- Rizvi, S. J., Zaretsky, A., Schaffer, A., & Levitt, A. (2015). Is immediate adjunctive CBT more beneficial than delayed CBT in treating depression?: A Pilot Study. *J Psychiatr Pract*, 21(2), 107-113. doi:10.1097/01.pra.0000462603.71983.15
- Rohan, K. J., Roecklein, K. A., Lindsey, K. T., Johnson, L. G., Lippy, R. D., Lacy, T. J., & Barton, F. B. (2007). A Randomized Controlled Trial of Cognitive-Behavioral Therapy, Light Therapy, and Their Combination for Seasonal Affective Disorder. *Journal of Consulting and Clinical Psychology*, 75(3), 489-500.
- Rohde P, Clarke GN, Mace DE, Jorgensen JS, Seeley JR. An efficacy/effectiveness study of cognitive-behavioral treatment for adolescents with comorbid major depression and conduct disorder. *J Am Acad Child Adolesc Psychiatry*. 2004;43:660-668.
- Rohde, P., Stice, E., Shaw, H., & Gau, J. M. (2016). Pilot trial of a dissonance-based cognitive-behavioral group depression prevention with college students. *Behaviour Research and Therapy*, 82, 21-27.
- Rohricht, F., Papadopoulos, N., & Priebe, S. (2013). An exploratory randomized controlled trial of body psychotherapy for patients with chronic depression. *J Affect Disord*, 151(1), 85-91. doi:10.1016/j.jad.2013.05.056
- Rosselló J, Bernal G. The efficacy of cognitive-behavioral and interpersonal treatments for depression in Puerto Rican adolescents. *J Consult Clin Psychol*. 1999;67:734-745.
- Ross, M., & Scott, M. (1985). An evaluation of the effectiveness of individual and group cognitive therapy in the treatment of depressed patients in an inner city health centre. *J R Coll Gen Pract*, 35(274), 239-242.
- Rosso, I., Killgore, W., Olson, E., Webb, C., Fukunaga, R., Auerbach, R., . . . Rauch, S. (2017). Internet-based cognitive behavior therapy for major depressive disorder: a randomized controlled trial. *Depress Anxiety*, 34(3), 236-245. Retrieved from <http://onlinelibrary.wiley.com/o/cochrane/clcentral/articles/893/CN-01443893/frame.html>
- Rude, S. S. (1986). Relative benefits of assertion or cognitive self-control treatment for depression as a function of proficiency in each domain. *J Consult Clin Psychol*, 54(3), 390-394.
- Ruwaard, J., Schrieken, B., Schrijver, M., Broeksteeg, J., Dekker, J., Vermeulen, H., & Lange, A. (2009). Standardized web-based cognitive behavioural therapy of mild to moderate depression: a randomized controlled trial with a long-term follow-up. *Cogn Behav Ther*, 38(4), 206-221. doi:10.1080/16506070802408086
- Sadler, P., McLaren, S., Klein, B., Harvey, J., & Jenkins, M. (2018). Cognitive behavior therapy for older adults with insomnia and depression: a randomized controlled trial in community mental health services. *Sleep*, 41(8) (no pagination). doi:10.1093/sleep/zsy104
- Safren, S. A., Bedoya, C. A., O'Cleirigh, C., Biello, K. B., Pinkston, M. M., Stein, M. D., . . . Mayer, K. H. (2016). Cognitive behavioural therapy for adherence and depression in patients with HIV: a three-arm randomised controlled trial. *The Lancet HIV*, 3(11), e529-e538.

- Safren, S. A., Gonzalez, J. S., Wexler, D. J., Psaros, C., Delahanty, L. M., Blashill, A. J., . . . Cagliero, E. (2014). A randomized controlled trial of cognitive behavioral therapy for adherence and depression (CBT-AD) in patients with uncontrolled type 2 diabetes. *Diabetes Care*, 37(3), 625-633.
- Safren, S. A., Bedoya, C. A., O'Cleirigh, C., Biello, K. B., Pinkston, M. M., Stein, M. D., . . . Mayer, K. H. (2016). Cognitive behavioural therapy for adherence and depression in patients with HIV: a three-arm randomised controlled trial. *The Lancet HIV*, 3(11), e529-e538.
- Saloheimo, H. P., Markowitz, J., Saloheimo, T. H., Laitinen, J. J., Sundell, J., Huttunen, M. O., . . . H, O. K. (2016). Psychotherapy effectiveness for major depression: a randomized trial in a Finnish community. *BMC Psychiatry*, 16, 131. doi:10.1186/s12888-016-0838-1
- Sanford M, Boyle M, McCleary L, et al. A pilot study of adjunctive family psychoeducation in adolescent major depression: Feasibility and treatment effect. *J Am Acad Child Adolesc Psychiatry*. 2006;45:386-395.
- Santomauro D, Sheffield J, Sofronoff K. Depression in adolescents with ASD: A pilot RCT of a group intervention. *J Autism Dev Disord*. 2016;46:572-588.
- Savard, J., Simard, S., Giguere, I., Ivers, H., Morin, C. M., Maunsell, E., . . . Marceau, D. (2006). Randomized clinical trial on cognitive therapy for depression in women with metastatic breast cancer: psychological and immunological effects. *Palliat Support Care*, 4(3), 219-237.
- Schmidt, M. M., & Miller, W. R. (1983). Amount of therapist contact and outcome in a multidimensional depression treatment program. *Acta Psychiatrica Scandinavica*, 67(5), 319-332.
- Schulberg, H. C., Block, M. R., Madonia, M. J., Scott, C. P., Rodriguez, E., Imber, S. D., . . . Coulehan, J. L. (1996). Treating major depression in primary care practice. Eight-month clinical outcomes. *Arch Gen Psychiatry*, 53(10), 913-919.
- Schuster, R., Leitner, I., Carlbring, P., & Laireiter, A.-R. (2017). Exploring blended group interventions for depression: randomised controlled feasibility study of a blended computer- and multimedia-supported psychoeducational group intervention for adults with depressive symptoms. *Internet Interventions*, 8, 63-71. Retrieved from <http://onlinelibrary.wiley.com/doi/10.1016/j.invent.2017.04.001>
- Scogin, F., Hamblin, D., & Beutler, L. (1987). Bibliotherapy for depressed older adults: A self-help alternative. *The Gerontologist*, 27(3), 383-387.
- Scogin, F., Jamison, C., & Gochneaur, K. (1989). Comparative efficacy of cognitive and behavioral bibliotherapy for mildly and moderately depressed older adults. *J Consult Clin Psychol*, 57(3), 403-407.
- Scogin, F., Lichstein, K., DiNapoli, E. A., Woosley, J., Thomas, S. J., Larocca, M. A., . . . et al. (2018). Effects of integrated telehealth-delivered cognitive-behavioral therapy for depression and insomnia in rural older adults. *Journal of Psychotherapy Integration*, 28(3), 292-309. doi:10.1037/int0000121
- Scogin, F. R., Moss, K., Harris, G. M., & Presnell, A. H. (2014). Treatment of depressive symptoms in diverse, rural, and vulnerable older adults. *Int J Geriatr Psychiatry*, 29(3), 310-316. doi:10.1002/gps.4009
- Scott, A. I., & Freeman, C. P. (1992). Edinburgh primary care depression study: treatment outcome, patient satisfaction, and cost after 16 weeks. *Bmj*, 304(6831), 883-887.
- Scott, C., Tacchi, M. J., Jones, R., & Scott, J. (1997). Acute and one-year outcome of a randomised controlled trial of brief cognitive therapy for major depressive disorder in primary care. *Br J Psychiatry*, 171, 131-134.

- Scott, M. J., & Stradling, S. G. (1990). Group cognitive therapy for depression produces clinically significant reliable change in community-based settings. *Behavioural Psychotherapy*, 18(01), 1-19.
- Segre, L. S., Brock, R. L., & O'Hara, M. W. (2015). Depression treatment for impoverished mothers by point-of-care providers: A randomized controlled trial. *Journal of Consulting and Clinical Psychology*, 83(2), 314-324.
- Selmi, P. M., Klein, M. H., Greist, J. H., Sorrell, S. P., & Erdman, H. P. (1990). Computer-administered cognitive-behavioral therapy for depression. *Am J Psychiatry*, 147(1), 51-56.
- Serfaty, M. A., Haworth, D., Blanchard, M., Buszewicz, M., Murad, S., & King, M. (2009). Clinical effectiveness of individual cognitive behavioral therapy for depressed older people in primary care: a randomized controlled trial. *Arch Gen Psychiatry*, 66(12), 1332-1340. doi:10.1001/archgenpsychiatry.2009.165
- Serrano, J. P., Latorre, J. M., Gatz, M., & Montanes, J. (2004). Life review therapy using autobiographical retrieval practice for older adults with depressive symptomatology. *Psychol Aging*, 19(2), 270-277. doi:10.1037/0882-7974.19.2.270
- Serrano Selva, J. P., Latorre Postigo, J. M., Ros Segura, L., Navarro Bravo, B., Aguilar Corcoles, M. J., Nieto Lopez, M., . . . Gatz, M. (2012). Life review therapy using autobiographical retrieval practice for older adults with clinical depression. *Psicothema*, 24(2), 224-229.
- Shaw, B. F. (1977). Comparison of cognitive therapy and behavior therapy in the treatment of depression. *Journal of Consulting and Clinical Psychology*, 45(4), 543.
- Sheeber, L. B., Seeley, J. R., Feil, E. G., Davis, B., Sorensen, E., Kosty, D. B., & Lewinsohn, P. M. (2012). Development and pilot evaluation of an Internet-facilitated cognitive-behavioral intervention for maternal depression. *J Consult Clin Psychol*, 80(5), 739-749. doi:10.1037/a0028820
- Sheeber, L., Feil, E., Seeley, J., Leve, C., Gau, J., Davis, B., . . . Allan, S. (2017). Mom-net: evaluation of an internet-facilitated cognitive behavioral intervention for low-income depressed mothers. *Journal of Consulting and Clinical Psychology*, 85(4), 355-366.
- Simoni, J. M., Wiebe, J. S., Saucedo, J. A., Huh, D., Sanchez, G., Longoria, V., . . . Safren, S. A. (2013). A preliminary RCT of CBT-AD for adherence and depression among HIV-positive Latinos on the U.S.-Mexico border: the Nuevo Dia study. *AIDS Behav*, 17(8), 2816-2829. doi:10.1007/s10461-013-0538-5
- Simpson, S., Corney, R., & Beecham, J. (2003). A randomized controlled trial to evaluate the effectiveness and cost-effectiveness of psychodynamic counselling for general practice patients with chronic depression. *Psychological Medicine*, 33(2), 229-239.
- Simson, U., Nawarotzky, U., Friese, G., Porck, W., Schottenfeld-Naor, Y., Hahn, S., . . . Kruse, J. (2008). Psychotherapy intervention to reduce depressive symptoms in patients with diabetic foot syndrome. *Diabet Med*, 25(2), 206-212. doi:10.1111/j.1464-5491.2007.02370.x
- Sinniah, A., Oei, T., Maniam, T., & Subramaniam, P. (2017). Positive effects of Individual Cognitive Behavior Therapy for patients with unipolar mood disorders with suicidal ideation in Malaysia: a randomised controlled trial. *Psychiatry research*, 254, 179-189. Retrieved from <http://onlinelibrary.wiley.com/o/cochrane/clcentral/articles/317/CN-01372317/frame.html> doi:10.1016/j.psychres.2017.04.026
- Sloane, R., Staples, F., & Schneider, L. (1985). Interpersonal therapy versus nortriptyline for depression in the elderly. *Clinical and pharmacological studies in psychiatric disorders*, 344-346.
- Smit, A., Kluiters, H., Conradi, H. J., Meer, K., Tiemens, B. G., Jenner, J. A., . . . Ormel, J. (2006). Short-term effects of enhanced treatment for depression in primary care: results

- from a randomized controlled trial. *Psychological Medicine*, 36(1), 15-26. Retrieved from <http://onlinelibrary.wiley.com/doi/10.1111/j.1365-2850.2011.01861.x>
- Smith, J., Newby, J. M., Burston, N., Murphy, M. J., Michael, S., Mackenzie, A., . . . Andrews, G. (2017). Help from home for depression: A randomised controlled trial comparing internet-delivered cognitive behaviour therapy with bibliotherapy for depression. *Internet Interventions*, 9, 25-37. doi:10.1016/j.invent.2017.05.001
- Songprakun, W., & McCann, T. V. (2012). Evaluation of a cognitive behavioural self-help manual for reducing depression: a randomized controlled trial. *J Psychiatr Ment Health Nurs*, 19(7), 647-653. doi:10.1111/j.1365-2850.2011.01861.x
- Spek, V., Nyklicek, I., Smits, N., Cuijpers, P., Riper, H., Keyzer, J., & Pop, V. (2007). Internet-based cognitive behavioural therapy for subthreshold depression in people over 50 years old: a randomized controlled clinical trial. *Psychol Med*, 37(12), 1797-1806.
- Spinelli, M. G., & Endicott, J. (2003). Controlled clinical trial of interpersonal psychotherapy versus parenting education program for depressed pregnant women. *Am J Psychiatry*, 160(3), 555-562.
- Spinelli, M. G., Endicott, J., Leon, A. C., Goetz, R. R., Kalish, R. B., Brustman, L. E., . . . Schulick, J. L. (2013). A controlled clinical treatment trial of interpersonal psychotherapy for depressed pregnant women at 3 New York City sites. *J Clin Psychiatry*, 74(4), 393-399. doi:10.4088/JCP.12m07909
- Sreevani, R., Reddemma, K., Chan, C. L., Leung, P. P., Wong, V., & Chan, C. H. (2013). Effectiveness of integrated body-mind-spirit group intervention on the well-being of Indian patients with depression: a pilot study. *J Nurs Res*, 21(3), 179-186. doi:10.1097/jnr.0b013e3182a0b041
- Stallard P, Sayal K, Phillips R, Taylor JA, Spears M, Anderson R, Araya R, Lewis G, Millings A, Montgomery AA (2012). Classroom based cognitive behavioural therapy in reducing symptoms of depression in high risk adolescents: pragmatic cluster randomised controlled trial. *BMJ*, 345, e6058.
- Stark KD, Reynolds WM, Kaslow NJ. A comparison of the relative efficacy of self-control therapy and a behavioral problem-solving therapy for depression in children. *J Abnorm Child Psychol*. 1987;15:91-113.
- Stice E, Burton E, Bearman SK, Rohde P. Randomized trial of a brief depression prevention program: An elusive search for a psychosocial placebo control condition. *Behav Res Ther*. 2007;45:863-876.
- Stice E, Rohde P, Gau JM, Wade E. Efficacy trial of a brief cognitive-behavioral depression prevention program for high-risk adolescents: Effects at 1- and 2-year follow-up. *J Consult Clin Psychol*. 2010;78:856-867.
- Stiles-Shields, C., Montague, E., Kwasny, M. J., & Mohr, D. C. (2018). Behavioral and cognitive intervention strategies delivered via coached apps for depression: Pilot trial. *Psychol Serv*. doi:10.1037/ser0000261
- Strauss, C., Hayward, M., & Chadwick, P. (2012). Group person-based cognitive therapy for chronic depression: a pilot randomized controlled trial. *Br J Clin Psychol*, 51(3), 345-350. doi:10.1111/j.2044-8260.2012.02036.x
- Strong, V., Waters, R., Hibberd, C., Murray, G., Wall, L., Walker, J., . . . Sharpe, M. (2008). Management of depression for people with cancer (SMaRT oncology 1): a randomised trial. *Lancet*, 372(9632), 40-48. doi:10.1016/s0140-6736(08)60991-5
- Sugg, H. V. R., Richards, D. A., & Frost, J. (2018). Morita Therapy for depression (Morita Trial): a pilot randomised controlled trial. *BMJ Open*, 8(8). doi:10.1136/bmjopen-2018-021605

- Swartz, H. A., Frank, E., Zuckoff, A., Cyranowski, J. M., Houck, P. R., Cheng, Y., . . . Shear, M. K. (2008). Brief interpersonal psychotherapy for depressed mothers whose children are receiving psychiatric treatment. *Am J Psychiatry*, 165(9), 1155-1162. doi:10.1176/appi.ajp.2008.07081339
- Szigethy E, Kenney E, Carpenter J, et al. Cognitive-behavioral therapy for adolescents with inflammatory bowel disease and subsyndromal depression. *J Am Acad Child Adolesc Psychiatry*. 2007;46:1290-1298.
- TADS Team. Fluoxetine, cognitive-behavioral therapy, and their combination for adolescents with depression: Treatment for Adolescents with Depression Study (TADS) randomized controlled trial. *JAMA*. 2004;292:807-820.
- Takagaki, K., Okamoto, Y., Jinnin, R., Mori, A., Nishiyama, Y., Yamamura, T., . . . Yamawaki, S. (2016). Behavioral activation for late adolescents with subthreshold depression: a randomized controlled trial. *European Child and Adolescent Psychiatry*, 25(11), 1171-1182.
- Talbot, N. L., Chaudron, L. H., Ward, E. A., Duberstein, P. R., Conwell, Y., O'Hara, M. W., . . . Stuart, S. (2011). A randomized effectiveness trial of interpersonal psychotherapy for depressed women with sexual abuse histories. *Psychiatr Serv*, 62(4), 374-380. doi:10.1176/appi.ps.62.4.374
- Taylor, C. B., Conrad, A., Wilhelm, F. H., Strachowski, D., Khaylis, A., Neri, E., . . . Spiegel, D. (2009). Does improving mood in depressed patients alter factors that may affect cardiovascular disease risk? *J Psychiatr Res*, 43(16), 1246-1252. doi:10.1016/j.jpsychires.2009.05.006
- Taylor, F. G., & Marshall, W. L. (1977). Experimental analysis of a cognitive-behavioral therapy for depression. *Cognitive Therapy and Research*, 1(1), 59-72.
- Teasdale, J. D., Fennell, M. J., Hibbert, G. A., & Amies, P. L. (1984). Cognitive therapy for major depressive disorder in primary care. *Br J Psychiatry*, 144, 400-406.
- Teichman, Y., Bar-el, Z., Shor, H., Sirota, P., & Elizur, A. (1995). A comparison of two modalities of cognitive therapy (individual and marital) in treating depression. *Psychiatry*, 58(2), 136-148.
- Teri, L., Logsdon, R. G., Uomoto, J., & McCurry, S. M. (1997). Behavioral treatment of depression in dementia patients: a controlled clinical trial. *J Gerontol B Psychol Sci Soc Sci*, 52(4), P159-166.
- Titov, N., Andrews, G., Davies, M., McIntyre, K., Robinson, E., & Solley, K. (2010). Internet treatment for depression: a randomized controlled trial comparing clinician vs. technician assistance. *PLoS ONE*, 5(6), e10939. doi:10.1371/journal.pone.0010939
- Titov, N., Dear, B. F., Ali, S., Zou, J. B., Lorian, C. N., Johnston, L., . . . Fogliati, V. J. (2015). Clinical and cost-effectiveness of therapist-guided internet-delivered cognitive behavior therapy for older adults with symptoms of depression: a randomized controlled trial. *Behav Ther*, 46(2), 193-205. doi:10.1016/j.beth.2014.09.008
- Tobin, K., Davey-Rothwell, M. A., Nonyane, B. A. S., Knowlton, A., Wissow, L., & Latkin, C. A. (2017). RCT of an integrated CBT-HIV intervention on depressive symptoms and HIV risk. *PLoS ONE*, 12(12), e0187180. doi:10.1371/journal.pone.0187180
- Tomasino, K., Lattie, E., Ho, J., Palac, H., Kaiser, S., & Mohr, D. (2017). Harnessing Peer Support in an Online Intervention for Older Adults with Depression. *American Journal of Geriatric Psychiatry*, 25(10), 1109-1119. Retrieved from <http://onlinelibrary.wiley.com/doi/10.1111/ajgp.12119>
- Tovote, K. A., Fleeer, J., Snippe, E., Peeters, A., Emmelkamp, P. M. G., Sanderman, R., . . . Schroevers, M. J. (2014). Individual mindfulness-based cognitive therapy and cognitive behavior therapy for treating depressive symptoms in patients with diabetes: Results of



- a randomized controlled trial. *Diabetes Care*, 37(9), 2427-2434. Retrieved from <http://onlinelibrary.wiley.com/o/cochrane/clcentral/articles/152/CN-01002152/frame.html>
- Town, J., Abbass, A., Stride, C., & Bernier, D. (2017). A randomised controlled trial of Intensive Short-Term Dynamic Psychotherapy for treatment resistant depression: the Halifax Depression Study. *Journal of Affective Disorders*, 214, 15-25. Retrieved from <http://onlinelibrary.wiley.com/o/cochrane/clcentral/articles/608/CN-01339608/frame.html> doi:10.1016/j.jad.2017.02.035
- Tulbure, B. T., Andersson, G., Salagean, N., Pearce, M., & Koenig, H. G. (2018). Religious versus Conventional Internet-based Cognitive Behavioral Therapy for Depression. *J Relig Health*, 57(5), 1634-1648. doi:10.1007/s10943-017-0503-0
- Turner, A., Hambridge, J., Baker, A., Bowman, J., & McElduff, P. (2013). Randomised controlled trial of group cognitive behaviour therapy versus brief intervention for depression in cardiac patients. *Aust N Z J Psychiatry*, 47(3), 235-243. doi:10.1177/0004867412460592
- Turner, R. W., Ward, M. F., & Turner, D. J. (1979). Behavioral treatment for depression: An evaluation of therapeutic components. *J Clin Psychol*, 35(1), 166-175.
- Tyson, G. M., & Range, L. M. (1987). Gestalt dialogues as a treatment for mild depression: time works just as well. *J Clin Psychol*, 43(2), 227-231.
- Unlu Ince, B., Cuijpers, P., Hof, E., Ballegooijen, W., Christensen, H., & Riper, H. (2013). Internet-based, culturally sensitive, problem-solving therapy for Turkish migrants with depression: randomized controlled trial. *Journal of medical Internet research*, 15(10), e227. Retrieved from <http://onlinelibrary.wiley.com/o/cochrane/clcentral/articles/866/CN-01038866/frame.html> doi:http://dx.doi.org/10.2196/jmir.2853
- van Bastelaar, K. M., Pouwer, F., Cuijpers, P., Riper, H., & Snoek, F. J. (2011). Web-based depression treatment for type 1 and type 2 diabetic patients: a randomized, controlled trial. *Diabetes Care*, 34(2), 320-325. doi:10.2337/dc10-1248
- Van der Zanden R, Kramer J, Gerrits R, Cuijpers P (2012). Effectiveness of an online group course for adolescents and young adults: A randomized trial. *Journal of Medical Internet Research*, 14, e86.
- van Schaik, A., van Marwijk, H., Adèr, H., van Dyck, R., de Haan, M., Penninx, B., . . . Beekman, A. (2006). Interpersonal Psychotherapy for Elderly Patients in Primary Care. *The American Journal of Geriatric Psychiatry*, 14(9), 777-786. doi:10.1097/01.JGP.0000199341.25431.4b
- Vázquez, F. L., Torres, Á., Otero, P., Blanco, V., Díaz, O., & Estévez, L. E. (2017). Analysis of the components of a cognitive-behavioral intervention administered via conference call for preventing depression among non-professional caregivers: A pilot study. *Aging Ment Health*, 21(9), 938-946. doi:10.1080/13607863.2016.1181714
- Vazquez Gonzalez, F. L., Otero Otero, P., Torres Iglesias, A., Hermida García, E., Blanco Seoane, V., & Díaz Fernández, O. (2013). A brief problem-solving indicated-prevention intervention for prevention of depression in nonprofessional caregivers. *Psicothema*, 25(1), 87-92. Retrieved from <http://onlinelibrary.wiley.com/o/cochrane/clcentral/articles/513/CN-00959513/frame.html> doi:10.7334/psicothema2012.89
- Verduyn, C., Barrowclough, C., Roberts, J., Tarrier, N., & Harrington, R. (2003). Maternal depression and child behaviour problems Randomised placebo-controlled trial of a cognitive-behavioural group intervention. *British Journal of Psychiatry*, 183(OCT.), 342-348.

- Vernmark, K., Lenndin, J., Björhed, J., Carlsson, M., Karlsson, J., Oberg, J., . . . Andersson, G. (2010). Internet administered guided self-help versus individualized e-mail therapy: A randomized trial of two versions of CBT for major depression. *Behaviour Research and Therapy*, 48(5), 368-376. Retrieved from <http://onlinelibrary.wiley.com/o/cochrane/clcentral/articles/971/CN-00749971/frame.html>
- Vitriol, V. G., Ballesteros, S. T., Florenzano, R. U., Weil, K. P., & Benadof, D. F. (2009). Evaluation of an outpatient intervention for women with severe depression and a history of childhood trauma. *Psychiatr Serv*, 60(7), 936-942. doi:10.1176/appi.ps.60.7.936
- Vostanis P, Feehan C, Grattan E, Bickerton W. Treatment for children and adolescents with depression: Lessons from a controlled trial. *Clin Child Psychol Psychiatry*. 1996a;1:199-212.
- Warmerdam, L., Straten, A., Twisk, J., Riper, H., & Cuijpers, P. (2008). Internet-based treatment for adults with depressive symptoms: randomized controlled trial. *Journal of medical Internet research*, 10(4), e44. Retrieved from <http://onlinelibrary.wiley.com/o/cochrane/clcentral/articles/612/CN-00667612/frame.html> doi:10.2196/jmir.1094
- Watkins, E. R., Taylor, R. S., Byng, R., Baeyens, C., Read, R., Pearson, K., & Watson, L. (2012). Guided self-help concreteness training as an intervention for major depression in primary care: a Phase II randomized controlled trial. *Psychol Med*, 42(7), 1359-1371. doi:10.1017/s0033291711002480
- Watt, L. M., & Cappeliez, P. (2000). Integrative and instrumental reminiscence therapies for depression in older adults: Intervention strategies and treatment effectiveness. *Aging Ment Health*, 4(2), 166-177.
- Weissman, M. M., Prusoff, B. A., Dimascio, A., Neu, C., Goklaney, M., & Klerman, G. L. (1979). The efficacy of drugs and psychotherapy in the treatment of acute depressive episodes. *Am J Psychiatry*, 136(4b), 555-558.
- Weisz JR, Southam-Gerow M, Gordis EB, et al. Cognitive-behavioral therapy versus usual clinical care for youth depression: An initial test of transportability to community clinics and clinicians. *J Consult Clin Psychol*. 2009;77:383-396.
- Weisz JR, Thurber CA, Sweeney L, Proffitt VD, LeGagnoux GL. Brief treatment of mild-to-moderate child depression using primary and secondary control enhancement training. *J Consult Clin Psychol*. 1997;65:703-707.
- Wickberg, B., & Hwang, C. P. (1996). Counselling of postnatal depression: a controlled study on a population based Swedish sample. *J Affect Disord*, 39(3), 209-216.
- Wiersma, J. E., Schaik, D. J. F., Hoogendorn, A. W., Dekker, J. J., Van, H. L., Schoevers, R. A., . . . Oppen, P. (2014). The effectiveness of the cognitive behavioral analysis system of psychotherapy for chronic depression: A randomized controlled trial. *Psychotherapy and psychosomatics*, 83(5), 263-269. Retrieved from <http://onlinelibrary.wiley.com/o/cochrane/clcentral/articles/826/CN-01001826/frame.html> doi:http://dx.doi.org/10.1159/000360795
- Wiklund, I., Mohlkert, P., & Edman, G. (2010). Evaluation of a brief cognitive intervention in patients with signs of postnatal depression: a randomized controlled trial. *Acta Obstet Gynecol Scand*, 89(8), 1100-1104. doi:10.3109/00016349.2010.500369
- Williams, A. D., Blackwell, S. E., Mackenzie, A., Holmes, E. A., & Andrews, G. (2013). Combining imagination and reason in the treatment of depression: A randomized controlled trial of internet-based cognitive-bias modification and internet-CBT for depression. *Journal of Consulting and Clinical Psychology*, 81(5), 793-799. Retrieved from <http://onlinelibrary.wiley.com/o/cochrane/clcentral/articles/389/CN-00974389/frame.html>

- Williams, C., McClay, C. A., Matthews, L., McConnachie, A., Haig, C., Walker, A., & Morrison, J. (2018). Community-based group guided self-help intervention for low mood and stress: Randomised controlled trial. *British Journal of Psychiatry*, 212(2), 88-95. doi:10.1192/bjp.2017.18
- Williams, C., Wilson, P., Morrison, J., McMahon, A., Andrew, W., Allan, L., . . . Tansey, L. (2013). Guided Self-Help Cognitive Behavioural Therapy for Depression in Primary Care: A Randomised Controlled Trial. *PLoS ONE*, 8(1).
- Williams, J. W., Barrett, J., Oxman, T., Frank, E., Katon, W., Sullivan, M., . . . Sengupta, A. (2000). Treatment of dysthymia and minor depression in primary care: A randomized controlled trial in older adults. *Jama*, 284(12), 1519-1526. Retrieved from <http://onlinelibrary.wiley.com/o/cochrane/clcentral/articles/681/CN-00299681/frame.html>
- Wilson, P. H., Goldin, J. C., & Charbonneau-Powis, M. (1983). Comparative efficacy of behavioral and cognitive treatments of depression. *Cognitive Therapy and Research*, 7(2), 111-124.
- Wollersheim, J. P., & Wilson, G. L. (1991). Group treatment of unipolar depression: A comparison of coping, supportive, bibliotherapy, and delayed treatment groups. *Professional Psychology: Research and Practice*, 22(6), 496.
- Wong, D. F. (2008). Cognitive and health-related outcomes of group cognitive behavioural treatment for people with depressive symptoms in Hong Kong: randomized wait-list control study. *Aust N Z J Psychiatry*, 42(8), 702-711. doi:10.1080/00048670802203418
- Wong, D. F. (2008). Cognitive behavioral treatment groups for people with chronic depression in Hong Kong: a randomized wait-list control design. *Depress Anxiety*, 25(2), 142-148. doi:10.1002/da.20286
- Wong, S. Y. S., Sun, Y. Y., Chan, A. T. Y., Leung, M. K. W., Chao, D. V. K., Li, C. C. K., . . . et al. (2018). Treating Subthreshold Depression in Primary Care: a Randomized Controlled Trial of Behavioral Activation With Mindfulness. *Annals of family medicine*, 16(2), 111-119. doi:10.1370/afm.2206
- Wright, J. H., Wright, A. S., Albano, A. M., Basco, M. R., Goldsmith, L. J., Raffield, T., & Otto, M. W. (2005). Computer-assisted cognitive therapy for depression: maintaining efficacy while reducing therapist time. *Am J Psychiatry*, 162(6), 1158-1164. doi:10.1176/appi.ajp.162.6.1158
- Wuthrich, V. M., & Rapee, R. M. (2013). Randomised controlled trial of group cognitive behavioural therapy for comorbid anxiety and depression in older adults. *Behaviour Research and Therapy*, 51(12), 779-786. Retrieved from <http://onlinelibrary.wiley.com/o/cochrane/clcentral/articles/045/CN-00915045/frame.html>
- Wuthrich, V. M., Rapee, R. M., Kangas, M., & Perini, S. (2016). Randomized controlled trial of group cognitive behavioral therapy compared to a discussion group for co-morbid anxiety and depression in older adults. *Psychol Med*, 46(4), 785-795. doi:10.1017/s0033291715002251
- Yang, X., Zhao, J., Chen, Y., Zu, S., & Zhao, J. (2018). Comprehensive self-control training benefits depressed college students: a six-month randomized controlled intervention trial. *Journal of Affective Disorders*, 226, 251-260. doi:10.1016/j.jad.2017.10.014
- Yeung, A., Wang, F., Feng, F., Zhang, J., Cooper, A., Hong, L., . . . Fava, M. (2017). Outcomes of an online computerized cognitive behavioral treatment program for treating chinese patients with depression: A pilot study. *Asian journal of psychiatry*. doi:10.1016/j.ajp.2017.11.007

- Young JF, Mufson L, Davies M. Efficacy of interpersonal psychotherapy adolescent skills training: An indicated preventive intervention for depression. *J Child Psychol Psychiatry*. 2006;47:1254-1262.
- Young JF, Mufson L, Gallop R. Preventing depression: A randomized trial of interpersonal psychotherapy-adolescent skills training. *Depress Anxiety*. 2010;27:426-433.
- Yu DL, Seligman MEP. Preventing depressive symptoms in Chinese children. *Prevention & Treatment*. 2002;5.
- Zemestani, M., Davoodi, I., Honarmand, M. M., Zargar, Y., & Ottaviani, C. (2016). Comparative effects of group metacognitive therapy versus behavioural activation in moderately depressed students. *Journal of Mental Health*, 25(6), 479-485.
- Zu, S., Xiang, Y.-T., Liu, J., Zhang, L., Wang, G., Ma, X., . . . Li, Z.-J. (2014). A comparison of cognitive-behavioral therapy, antidepressants, their combination and standard treatment for Chinese patients with moderate–severe major depressive disorders. *Journal of Affective Disorders*, 152-154, 262-267. doi:10.1016/j.jad.2013.09.022

Companion papers (used for calculation of long-term effects)

- Allart-van Dam, E., Hosman, C. M., Hoogduin, C. A., & Schaap, C. P. (2007). Prevention of depression in subclinically depressed adults: follow-up effects on the 'Coping with Depression' course. *J Affect Disord*, 97(1-3), 219-228. doi:10.1016/j.jad.2006.06.020
- Bass, J., Neugebauer, R., Clougherty, K. F., Verdelli, H., Wickramaratne, P., Ndogoni, L., . . . Bolton, P. (2006). Group interpersonal psychotherapy for depression in rural Uganda: 6-month outcomes: randomised controlled trial. *Br J Psychiatry*, 188, 567-573. doi:10.1192/bjp.188.6.567
- Buntrock, C., Ebert, D. D., Lehr, D., Smit, F., Riper, H., Berking, M., & Cuijpers, P. (2016). Effect of a Web-Based Guided Self-help Intervention for Prevention of Major Depression in Adults With Subthreshold Depression: A Randomized Clinical Trial. *Jama*, 315(17), 1854-1863. doi:10.1001/jama.2016.4326
- Conradi, H., Bos, E., Kamphuis, J., & Jonge, P. (2017). The ten-year course of depression in primary care and long-term effects of psychoeducation, psychiatric consultation and cognitive behavioral therapy. *Journal of Affective Disorders*, 217, 60-66.
- Conradi, H. J., de Jonge, P., Kluiters, H., Smit, A., van der Meer, K., Jennifer, J. A., . . . Ormel, J. (2007). Enhanced treatment for depression in primary care: Long-term outcomes of a psycho-educational prevention program alone and enriched with psychiatric consultation or cognitive behavioral therapy. *Psychological Medicine*, 37(6), 849-862.
- Corney, R., & Simpson, S. (2005). Thirty-six month outcome data from a trial of counselling with chronically depressed patients in a general practice setting. *Psychol Psychother*, 78(Pt 1), 127-138.
- Ebert, D., Nobis, S., Lehr, D., Baumeister, H., Riper, H., Auerbach, R., . . . Berking, M. (2017). The 6-month effectiveness of Internet-based guided self-help for depression in adults with Type 1 and 2 diabetes mellitus. *Diabetic medicine*, 34(1), 99-107.
- Green, B. L., Krupnick, J. L., Chung, J., Siddique, J., Krause, E. D., Revicki, D., . . . Miranda, J. (2006). Impact of PTSD comorbidity on one-year outcomes in a depression trial. *J Clin Psychol*, 62(7), 815-835. doi:10.1002/jclp.20279
- Hallgren, M., Helgadóttir, B., Herring, M. P., Zeebari, Z., Lindfors, N., Kalso, V., . . . Forsell, Y. (2016). Exercise and internet-based cognitive-behavioural therapy for depression: Multicentre randomized controlled trial with 12-month follow-up. *British Journal of Psychiatry*, 209(5), 414-420.

- Miranda, J., Green, B. L., Krupnick, J. L., Chung, J., Siddique, J., Belin, T., & Revicki, D. (2006). One-year outcomes of a randomized clinical trial treating depression in low-income minority women. *J Consult Clin Psychol*, 74(1), 99-111. doi:10.1037/0022-006x.74.1.99
- Otero, P., Smit, F., Cuijpers, P., Torres, A., Blanco, V., & Vázquez, F. L. (2015). Long-term efficacy of indicated prevention of depression in non-professional caregivers: Randomized controlled trial. *Psychological Medicine*, 45(7), 1401-1412.
- López L, Smit F, Cuijpers P, Otero P, Blanco V, Torres Á, Vázquez FL (2019). Problem-solving intervention to prevent depression in non-professional caregivers: a randomized controlled trial with 8 years of follow-up. *Psychol Med*. 2019 Apr 24:1-8.
- Reay, R. E., Owen, C., Shadbolt, B., Raphael, B., Mulcahy, R., & Wilkinson, R. B. (2012). Trajectories of long-term outcomes for postnatally depressed mothers treated with group interpersonal psychotherapy. *Arch Womens Ment Health*, 15(3), 217-228. doi:10.1007/s00737-012-0280-4
- Spek, V., Cuijpers, P., Nyklicek, I., Smits, N., Riper, H., Keyzer, J., & Pop, V. (2008). One-year follow-up results of a randomized controlled clinical trial on internet-based cognitive behavioural therapy for subthreshold depression in people over 50 years. *Psychol Med*, 38(5), 635-639. doi:10.1017/s0033291707002590
- Vázquez, F. L., Torres, Á., Blanco, V., Otero, P., Díaz, O., & Ferraces, M. J. (2016). Long-term Follow-up of a Randomized Clinical Trial Assessing the Efficacy of a Brief Cognitive-Behavioral Depression Prevention Intervention for Caregivers with Elevated Depressive Symptoms. *American Journal of Geriatric Psychiatry*, 24(6), 421-432.
- Weobong, B., Weiss, H. A., McDaid, D., Singla, D. R., Hollon, S. D., Nadkarni, A., . . . Patel, V. (2017). Sustained effectiveness and cost-effectiveness of the Healthy Activity Programme, a brief psychological treatment for depression delivered by lay counsellors in primary care: 12-month follow-up of a randomised controlled trial. *PLoS Med*, 14(9), e1002385. doi:10.1371/journal.pmed.1002385

Appendix F. Characteristics of trials of psychotherapies on depression in different age groups (N=366) and interventions tested in these trials (N=453)

|                                             |                        | <i>Children &amp; adolescents</i> |          | <i>Early-middle aged adults</i> |          | <i>Late adults</i> |          | <i>Total</i> |          | <i>p</i>         |
|---------------------------------------------|------------------------|-----------------------------------|----------|---------------------------------|----------|--------------------|----------|--------------|----------|------------------|
|                                             |                        | <i>N</i>                          | <i>%</i> | <i>N</i>                        | <i>%</i> | <i>N</i>           | <i>%</i> | <i>N</i>     | <i>%</i> |                  |
| <b>Study characteristics (N=366)</b>        |                        |                                   |          |                                 |          |                    |          |              |          |                  |
| Recruitment                                 | Community              | 8                                 | 21.6     | 120                             | 46.0     | 26                 | 38.2     | 154          | 42.1     | <u>&lt;0.001</u> |
|                                             | Clinical               | 7                                 | 18.9     | 69                              | 26.4     | 8                  | 11.8     | 84           | 23.0     |                  |
|                                             | Other                  | 22                                | 59.5     | 72                              | 27.6     | 34                 | 50.0     | 128          | 35.0     |                  |
| Diagnosis                                   | Depressive disorder    | 16                                | 43.2     | 143                             | 54.8     | 22                 | 32.4     | 181          | 49.5     | <u>0.003</u>     |
|                                             | Cut-off                | 21                                | 56.8     | 118                             | 45.2     | 46                 | 67.6     | 185          | 50.5     |                  |
| Target group                                | General population     | 31                                | 83.8     | 149                             | 57.1     | 36                 | 52.9     | 216          | 59.0     | <u>0.004</u>     |
|                                             | Specific group         | 6                                 | 16.2     | 112                             | 42.9     | 32                 | 47.1     | 150          | 41.0     |                  |
| Women <sup>a)</sup>                         | <50%                   | 8                                 | 21.6     | 29                              | 11.3     | 15                 | 22.7     | 52           | 14.4     | <u>&lt;0.001</u> |
|                                             | 50-75%                 | 25                                | 67.6     | 108                             | 42.0     | 26                 | 39.4     | 159          | 44.2     |                  |
|                                             | >75%                   | 4                                 | 10.8     | 120                             | 46.7     | 25                 | 37.9     | 149          | 41.4     |                  |
| Control group                               | Waiting list           | 14                                | 37.8     | 100                             | 38.3     | 19                 | 27.9     | 133          | 36.3     | 0.24             |
|                                             | Usual care             | 14                                | 37.8     | 123                             | 47.1     | 34                 | 50.0     | 171          | 46.7     |                  |
|                                             | Other                  | 9                                 | 24.3     | 38                              | 14.6     | 15                 | 22.1     | 62           | 16.9     |                  |
| Country                                     | North America          | 27                                | 73.0     | 98                              | 37.5     | 29                 | 42.6     | 154          | 42.1     | <u>0.003</u>     |
|                                             | Europe                 | 4                                 | 10.8     | 97                              | 37.2     | 28                 | 41.2     | 129          | 35.2     |                  |
|                                             | Australia              | 2                                 | 5.4      | 17                              | 6.5      | 6                  | 8.8      | 25           | 6.8      |                  |
|                                             | East Asia              | 2                                 | 5.4      | 24                              | 9.2      | 4                  | 5.9      | 30           | 8.2      |                  |
|                                             | Other                  | 2                                 | 5.4      | 25                              | 9.6      | 1                  | 1.5      | 28           | 7.7      |                  |
| Risk of bias                                | Sequence generation    | 17                                | 45.9     | 141                             | 54.0     | 41                 | 60.3     | 199          | 54.4     | 0.36             |
|                                             | Allocation concealment | 8                                 | 21.6     | 124                             | 47.5     | 32                 | 47.1     | 164          | 44.8     | <u>0.01</u>      |
|                                             | Blinded assessment     | 31                                | 83.8     | 242                             | 92.7     | 62                 | 91.5     | 335          | 91.5     | 0.19             |
|                                             | Intention-to-treat     | 21                                | 56.8     | 156                             | 59.8     | 45                 | 66.2     | 222          | 60.7     | 0.55             |
| RoB total score                             | 0 or 1                 | 14                                | 37.8     | 69                              | 26.4     | 15                 | 22.1     | 98           | 26.8     | 0.20             |
|                                             | 2 or 3                 | 18                                | 48.6     | 113                             | 43.3     | 31                 | 45.6     | 162          | 44.3     |                  |
|                                             | 4                      | 5                                 | 13.5     | 79                              | 30.3     | 22                 | 32.4     | 106          | 29.0     |                  |
| <b>Intervention characteristics (N=453)</b> |                        |                                   |          |                                 |          |                    |          |              |          |                  |
| Type                                        | CBT                    | 28                                | 65.1     | 176                             | 53.2     | 42                 | 53.2     | 246          | 54.3     | 0.33             |
|                                             | Other                  | 15                                | 34.9     | 155                             | 46.8     | 37                 | 46.8     | 207          | 45.7     |                  |
| Format                                      | Individual             | 13                                | 30.2     | 121                             | 36.6     | 38                 | 48.1     | 172          | 38.0     | <u>0.01</u>      |
|                                             | Group                  | 23                                | 53.5     | 107                             | 32.3     | 22                 | 27.8     | 152          | 33.6     |                  |
|                                             | Guided self-help       | 1                                 | 2.3      | 67                              | 20.2     | 12                 | 15.2     | 80           | 17.8     |                  |
|                                             | Mixed/other            | 6                                 | 14.0     | 36                              | 10.9     | 7                  | 8.9      | 49           | 10.8     |                  |
| Number of sessions                          | ≤ 6                    | 3                                 | 7.0      | 104                             | 31.4     | 33                 | 41.8     | 140          | 30.9     | <u>&lt;0.001</u> |
|                                             | 7-12                   | 24                                | 55.8     | 168                             | 50.8     | 41                 | 51.9     | 233          | 51.4     |                  |
|                                             | > 13                   | 16                                | 37.2     | 59                              | 17.8     | 5                  | 6.3      | 80           | 17.7     |                  |

Abbreviations: CBT: cognitive behavior therapy; RoB: Risk of Bias.

<sup>a)</sup> 6 studies did not report the proportion of women and were not included in these data

## AppendixG. Description of sample of included studies

As can be seen in the table, most studies recruited participants from the community (42.1%), whereas 23% of the studies focused on clinical samples only (the other 35% used other recruitment methods). About half of the studies included only participants who met criteria for a depressive disorder according to a diagnostic interview (49.5%). A total of 41.0% of the studies (N=150) were focused on specific subgroups of depressed populations (18.9% with both depression and comorbid general medical disorders; 10.7% were women with postpartum depression; and 11.5 belonged to another specific population), whereas the majority (59%) focused on general populations of depressed persons not otherwise specified. In most studies the majority of participants were women (44.2% had between 50 and 75% women, and 41.4% had more than 75% women). CBT was the most often-used type of therapy (54.3%), followed by interpersonal psychotherapy (7.3%), problem-solving therapy (7.1%) and behavioral activation therapy (5.3%). Most therapies used an individual (38%) or group format (33.6%). The majority of studies had seven to twelve sessions (51.4%), whereas the rest had fewer (30.9%) or more sessions (17.7%). Most studies used a usual care (46.7%) or a waiting list control group (36.3%), and most studies were conducted in North America (42.1%) or in Europe (35.2%).

## Appendix H. Sensitivity analyses: Only low risk of bias <sup>a)</sup>

|                                    | <i>Only low risk of bias</i> |          |               |                      |               |                       |
|------------------------------------|------------------------------|----------|---------------|----------------------|---------------|-----------------------|
|                                    | <i>N<sub>st</sub></i>        | <i>g</i> | <i>95% CI</i> | <i>I<sup>2</sup></i> | <i>95% CI</i> | <i>p<sup>b)</sup></i> |
| <u>All studies</u>                 |                              |          |               |                      |               |                       |
| All comparisons                    | 120                          | 0.51     | 0.42~0.60     | 76                   | 72~80         |                       |
| Outliers excluded ( $g \geq 1.5$ ) | 115                          | 0.46     | 0.39~0.54     | 72                   | 67~77         |                       |
| Adjusted for publication bias      | 153                          | 0.32     | 0.21~0.42     | 82                   | 79~84         |                       |
|                                    |                              |          |               |                      |               |                       |
| <u>Specific age categories</u>     |                              |          |               |                      |               | 0.06                  |
| • Children                         | 1                            | 0.28     | -0.09~0.65    | 0                    |               |                       |
| • Adolescents                      | 5                            | 0.24     | -0.18~0.65    | 73                   | 32~89         |                       |
| • Young adults                     | 4                            | 0.65     | 0.20~1.10     | 73                   | 24~90         |                       |
| • Middle aged adults               | 86                           | 0.52     | 0.42~0.63     | 76                   | 71~80         |                       |
| • Older adults                     | 20                           | 0.57     | 0.25~0.89     | 77                   | 65~85         |                       |
| • Older old adults                 | 4                            | 0.30     | 0.03~0.57     | 0                    | 0~82          |                       |
| •                                  |                              |          |               |                      |               |                       |
| <u>Main age categories</u>         |                              |          |               |                      |               | 0.08                  |
| • Children & adolescents           | 6                            | 0.24     | -0.07~0.54    | 67                   | 22~86         |                       |
| • Early-middle aged adults         | 90                           | 0.53     | 0.43~0.63     | 76                   | 71~80         |                       |
| • Late adults                      | 24                           | 0.52     | 0.26~0.78     | 74                   | 61~82         |                       |
|                                    |                              |          |               |                      |               |                       |

Abbreviations: CBT: cognitive behavior therapy; CI: confidence interval; g: Hedges' g; Nst: number of studies

<sup>a)</sup> according to the random effects model.

<sup>b)</sup> the p-value indicates the significance of the difference between subgroups.



## Appendix I. Sensitivity analyses: Only CBT <sup>a)</sup>

|                                    | <i>Only CBT</i>       |          |               |                      |               |                       |
|------------------------------------|-----------------------|----------|---------------|----------------------|---------------|-----------------------|
|                                    | <i>N<sub>st</sub></i> | <i>g</i> | <i>95% CI</i> | <i>I<sup>2</sup></i> | <i>95% CI</i> | <i>p<sup>b)</sup></i> |
| <u>All studies</u>                 |                       |          |               |                      |               |                       |
| All comparisons                    | 247                   | 0.78     | 0.67~0.90     | 81                   | 79~83         |                       |
| Outliers excluded ( $g \geq 1.5$ ) | 216                   | 0.56     | 51~0.62       | 61                   | 55~67         |                       |
| Adjusted for publication bias      | 311                   | 0.45     | 0.30~0.60     | 87                   | 86~88         |                       |
|                                    |                       |          |               |                      |               |                       |
| <u>Specific age categories</u>     |                       |          |               |                      |               | <0.001                |
| • Children                         | 11                    | 0.28     | 0.05~0.50     | 23                   | 0~61          |                       |
| • Adolescents                      | 17                    | 0.54     | 0.23~0.85     | 85                   | 77~90         |                       |
| • Young adults                     | 15                    | 0.93     | 0.72~1.14     | 0                    | 0~49          |                       |
| • Middle aged adults               | 162                   | 0.83     | 0.66~1.00     | 82                   | 79~84         |                       |
| • Older adults                     | 37                    | 0.72     | 0.54~0.91     | 73                   | 63~81         |                       |
| • Older old adults                 | 5                     | 0.96     | -0.30~2.22    | 93                   | 87~96         |                       |
| •                                  |                       |          |               |                      |               |                       |
| <u>Main age categories</u>         |                       |          |               |                      |               |                       |
| • Children & adolescents           | 28                    | 0.44     | 0.23~0.65     | 78                   | 68~84         | <u>0.01</u>           |
| • Early-middle aged adults         | 177                   | 0.85     | 0.69~1.01     | 81                   | 78~83         |                       |
| • Late adults                      | 42                    | 0.75     | 0.56~0.95     | 79                   | 72~84         |                       |
|                                    |                       |          |               |                      |               |                       |

Abbreviations: CBT: cognitive behavior therapy; CI: confidence interval; g: Hedges' g; Nst: number of studies

<sup>a)</sup> according to the random effects model.

<sup>b)</sup> the p-value indicates the significance of the difference between subgroups.

## Appendix J. Sensitivity analyses: Specific target populations excluded <sup>a)</sup>

|                                 | <i>Only CBT</i>       |          |               |                      |               |                       |
|---------------------------------|-----------------------|----------|---------------|----------------------|---------------|-----------------------|
|                                 | <i>N<sub>st</sub></i> | <i>g</i> | <i>95% CI</i> | <i>I<sup>2</sup></i> | <i>95% CI</i> | <i>p<sup>b)</sup></i> |
| <u>All studies</u>              |                       |          |               |                      |               |                       |
| All comparisons                 | 280                   | 0.76     | 0.68~0.84     | 78                   | 75~80         |                       |
| Outliers excluded ( $g > 1.5$ ) | 243                   | 0.56     | 0.51~0.61     | 61                   | 56~66         |                       |
| Adjusted for publication bias   | 368                   | 0.43     | 0.33~0.54     | 84                   | 83~86         |                       |
|                                 |                       |          |               |                      |               |                       |
| <u>Specific age categories</u>  |                       |          |               |                      |               | <u>&lt;0.001</u>      |
| • Children                      | 15                    | 0.35     | 0.15~0.55     | 29                   | 0~62          |                       |
| • Adolescents                   | 22                    | 0.61     | 0.35~0.86     | 83                   | 75~88         |                       |
| • Young adults                  | 25                    | 0.98     | 0.78~1.18     | 45                   | 13~66         |                       |
| • Middle aged adults            | 175                   | 0.76     | 0.65~0.88     | 79                   | 75~81         |                       |
| • Older adults                  | 38                    | 0.81     | 0.59~1.03     | 79                   | 72~84         |                       |
| • Older old adults              | 5                     | 0.97     | -0.22~2.16    | 91                   | 82~95         |                       |
| •                               |                       |          |               |                      |               |                       |
| <u>Main age categories</u>      |                       |          |               |                      |               | <u>0.01</u>           |
| • Children & adolescents        | 37                    | 0.51     | 0.34~0.68     | 75                   | 66~82         |                       |
| • Early-middle aged adults      | 200                   | 0.79     | 0.69~0.90     | 77                   | 74~80         |                       |
| • Late adults                   | 43                    | 0.83     | 0.62~1.04     | 81                   | 75~85         |                       |
|                                 |                       |          |               |                      |               |                       |

Abbreviations: CBT: cognitive behavior therapy; CI: confidence interval; g: Hedges' g; Nst: number of studies

<sup>a)</sup> according to the random effects model.

<sup>b)</sup> the p-value indicates the significance of the difference between subgroups.

## Appendix K. Sensitivity analyses: Only diagnosed mood disorders <sup>a)</sup>

|                                    | <i>N<sub>st</sub></i> | <i>g</i> | 95% <i>CI</i> | <i>I</i> <sup>2</sup> | 95% <i>CI</i> | <i>p</i> <sup>b)</sup> |
|------------------------------------|-----------------------|----------|---------------|-----------------------|---------------|------------------------|
| <u>All studies</u>                 |                       |          |               |                       |               |                        |
| All comparisons                    | 217                   | 0.78     | 0.68~0.89     | 82                    | 80~84         |                        |
| Outliers excluded ( $g \geq 1.5$ ) | 194                   | 0.58     | 0.52~0.64     | 68                    | 63~72         |                        |
| Adjusted for publication bias      | 281                   | 0.44     | 0.30~0.57     | 88                    | 87~89         |                        |
| <u>Specific age categories</u>     |                       |          |               |                       |               |                        |
| • Children                         | 5                     | 0.58     | -0.10~1.25    | 62                    | 0~86          |                        |
| • Adolescents                      | 15                    | 0.56     | 0.24~0.88     | 83                    | 74~89         |                        |
| • Young adults                     | 4                     | 1.18     | 0.18~2.17     | 39                    | 0~79          |                        |
| • Middle aged adults               | 168                   | 0.83     | 0.70~0.96     | 83                    | 81~85         |                        |
| • Older adults                     | 24                    | 0.54     | 0.36~0.71     | 68                    | 52~79         |                        |
| • Older old adults                 | 1                     | 2.63     | 1.87~3.39     | 0                     | -             |                        |
| •                                  |                       |          |               |                       |               |                        |
| <u>Main age categories</u>         |                       |          |               |                       |               |                        |
| • Children & adolescents           | 20                    | 0.56     | 0.30~0.82     | 80                    | 70~87         | 0.07                   |
| • Early-middle aged adults         | 172                   | 0.84     | 0.71~0.97     | 83                    | 81~85         |                        |
| • Late adults                      | 25                    | 0.62     | 0.39~0.86     | 77                    | 66~84         |                        |
|                                    |                       |          |               |                       |               |                        |

Abbreviations: CBT: cognitive behavior therapy; CI: confidence interval; *g*: Hedges' *g*; *N<sub>st</sub>*: number of studies

<sup>a)</sup> according to the random effects model.

<sup>b)</sup> the *p*-value indicates the significance of the difference between subgroups.

## Appendix L. Sensitivity analyses using the multilevel meta-analysis model

|                                    | $N_{st}$ | $g^{a)}$ | 95% CI    | $\tau_B^2$ | $\tau_W^2$ | $P^{b)}$         |
|------------------------------------|----------|----------|-----------|------------|------------|------------------|
| All comparisons                    | 366      | 0.71     | 0.64~0.78 | 0.34       | 0.00       |                  |
| Outliers excluded ( $g \geq 1.5$ ) | 329      | 0.52     | 0.48~0.56 | 0.08       | 0.00       |                  |
| Only low RoB                       | 106      | 0.49     | 0.41~0.58 | 0.15       | 0.00       |                  |
| <u>Specific age categories</u>     |          |          |           |            |            |                  |
| • Children                         | 13       | 0.31     | 0.12~0.50 | 0.05       | 0.00       | <u>&lt;0.001</u> |
| • Adolescents                      | 24       | 0.55     | 0.34~0.76 | 0.17       | 0.04       |                  |
| • Young adults                     | 19       | 0.89     | 0.73~1.06 | 0.06       | 0.00       |                  |
| • Middle aged adults               | 242      | 0.74     | 0.65~0.83 | 0.43       | 0.00       |                  |
| • Older adults                     | 58       | 0.62     | 0.46~0.77 | 0.23       | 0.04       |                  |
| • Older old adults                 | 10       | 0.97     | 0.50~1.44 | 0.25       | 0.25       |                  |
| <u>Main age categories</u>         |          |          |           |            |            |                  |
| • Children & adolescents           | 37       | 0.47     | 0.32~0.62 | 0.13       | 0.02       | <u>0.003</u>     |
| • Early-middle aged adults         | 261      | 0.76     | 0.67~0.84 | 0.39       | 0.00       |                  |
| • Late adults                      | 68       | 0.66     | 0.52~0.82 | 0.26       | 0.05       |                  |

Abbreviations: CI: confidence interval;  $N_{st}$ : number of studies.

a) sensitivity analyses using a multilevel meta-analysis model that addresses within-studies correlations for multiple outcomes from a single trial: a three-level random-effects model for  $j$ th outcome of  $i$ th trial  $y_{ij}$ ;  $y_{ij} \sim N(\theta_{wij}, \sigma_{ij}^2)$ ,  $\theta_{wij} \sim N(\theta_{Bi}, \tau_W^2)$ ,  $\theta_{Bi} \sim N(g, \tau_B^2)$ .

b) the p-value indicates the significance of the difference between subgroups.

## Appendix M. Long-term effects of psychotherapies for depression across different age groups

|                                     |                          | <i>N<sub>st</sub></i> | <i>g</i> | 95% <i>CI</i> | <i>I</i> <sup>2</sup> | 95% <i>CI</i> | <i>p</i> <sup>b)</sup> |
|-------------------------------------|--------------------------|-----------------------|----------|---------------|-----------------------|---------------|------------------------|
| <u>6 – 8 months FU</u>              |                          |                       |          |               |                       |               |                        |
| All comparisons                     |                          | 93                    | 0.53     | 0.20~0.86     | 86                    | 83~88         |                        |
| Outliers excluded ( <i>g</i> ≥1.5)  |                          | 87                    | 0.31     | 0.24~0.38     | 63                    | 53~70         |                        |
| Only low RoB                        |                          | 29                    | 0.24     | 0.10~0.37     | 62                    | 43~74         |                        |
| Adjusted for publication bias       |                          | 93                    | 0.53     | 0.20~0.86     | 86                    | 83~88         |                        |
|                                     |                          |                       |          |               |                       |               |                        |
| <u>Age categories</u>               | – Children & adolescents | 9                     | 0.27     | -0.17~0.70    | 56                    | 6~79          | 0.21                   |
|                                     | – Early-middle adults    | 62                    | 0.71     | 0.19~1.23     | 89                    | 86~91         |                        |
|                                     | – Late adults            | 22                    | 0.22     | 0.01~0.43     | 70                    | 53~80         |                        |
| <u>9-12 months FU</u>               |                          |                       |          |               |                       |               |                        |
| All comparisons                     |                          | 69                    | 0.39     | 0.19~0.59     | 82                    | 77~85         |                        |
| Outliers excluded ( <i>g</i> ≥1.5)  |                          | 67                    | 0.25     | 0.19~0.32     | 59                    | 46~69         |                        |
| Only low RoB                        |                          | 31                    | 0.45     | 0.11~0.78     | 86                    | 81~90         |                        |
| Adjusted for publication bias       |                          | 80                    | 0.19     | -0.07~0.44    | 88                    | 86~90         |                        |
|                                     |                          |                       |          |               |                       |               |                        |
| <u>Age categories</u>               | – Children & adolescents | 8                     | 0.09     | -0.10~0.28    | 63                    | 19~83         | 0.03                   |
|                                     | – Early-middle adults    | 44                    | 0.51     | 0.19~0.82     | 86                    | 83~89         |                        |
|                                     | – Late adults            | 17                    | 0.27     | 0.18~0.37     | 25                    | 0~58          |                        |
| <u>13-24 months FU</u>              |                          |                       |          |               |                       |               |                        |
| All comparisons                     |                          | 25                    | 0.17     | 0.02~0.32     | 76                    | 65~84         |                        |
| Outliers excluded ( <i>g</i> ≥1.5)  |                          | 25                    | 0.17     | 0.02~0.32     | 76                    | 65~84         |                        |
| Only low RoB                        |                          | 7                     | 0.20     | 0.07~0.33     | 0                     | 0~42          |                        |
| Adjusted for publication bias       |                          | 30                    | 0.25     | 0.10~0.39     | 76                    | 65~83         |                        |
|                                     |                          |                       |          |               |                       |               |                        |
| <u>Age categories</u>               | – Children & adolescents | 9                     | 0.04     | -0.11~0.19    | 0                     | 0~63          | 0.09                   |
|                                     | – Early-middle adults    | 14                    | 0.30     | 0.05~0.55     | 81                    | 69~88         |                        |
|                                     | – Late adults            | 2                     | 0.05     | 0.04~0.06     | 0                     | -             |                        |
| <u>&gt;24 months FU</u>             |                          |                       |          |               |                       |               |                        |
| All comparisons                     |                          | 13                    | 0.20     | 0.07~0.33     | 4                     | 0~58          |                        |
| Outliers excluded ( <i>g</i> ≥1.5)  |                          | 13                    | 0.20     | 0.07~0.33     | 4                     | 0~58          |                        |
| Only low RoB                        |                          | 7                     | 0.22     | 0.01~0.42     | 23                    | 0~66          |                        |
| Adjusted for publication bias       |                          | 18                    | 0.31     | 0.17~0.44     | 36                    | 0~64          |                        |
|                                     |                          |                       |          |               |                       |               |                        |
| <u>Age categories</u> <sup>c)</sup> | – Children & adolescents | 3                     | 0.08     | -0.47~0.63    | 18                    | 0~92          | 0.26                   |
|                                     | – Early-middle adults    | 10                    | 0.24     | 0.09~0.39     | 0                     | 0~61          |                        |

Abbreviations: CI: confidence interval; FU: follow-up; *g*: Hedges' *g*; *N<sub>st</sub>*: number of studies; RoB: risk of bias.

a) according to the random effects model.

b) the *p*-value indicates the significance of the difference between subgroups.

c) There were no studies in older adults with more than 24 months follow-up
